# Supplementary material for: Acai Berry (Euterpe sp.) Extracts Are Neuroprotective against L-Glutamate-Induced Toxicity by Limiting Mitochondrial Dysfunction and Cellular Redox Stress
Source: MDPI journal article supplement (doi:10.3390/life13041019), 2023-04-15

Supplementary Figure S1: LC-MS profiling for phytochemicals from acai berry aqueous and ethanolic extracts.

Acai berry aqueous and ethanolic extractions were resolved by high performance liquid chromatography coupled to mass spectrometer (LC-MS). Compounds were identified by comparing the retention time, parent ion, and mass fragments with authentic standards and MS<sup>2</sup> fragmentation patterns.

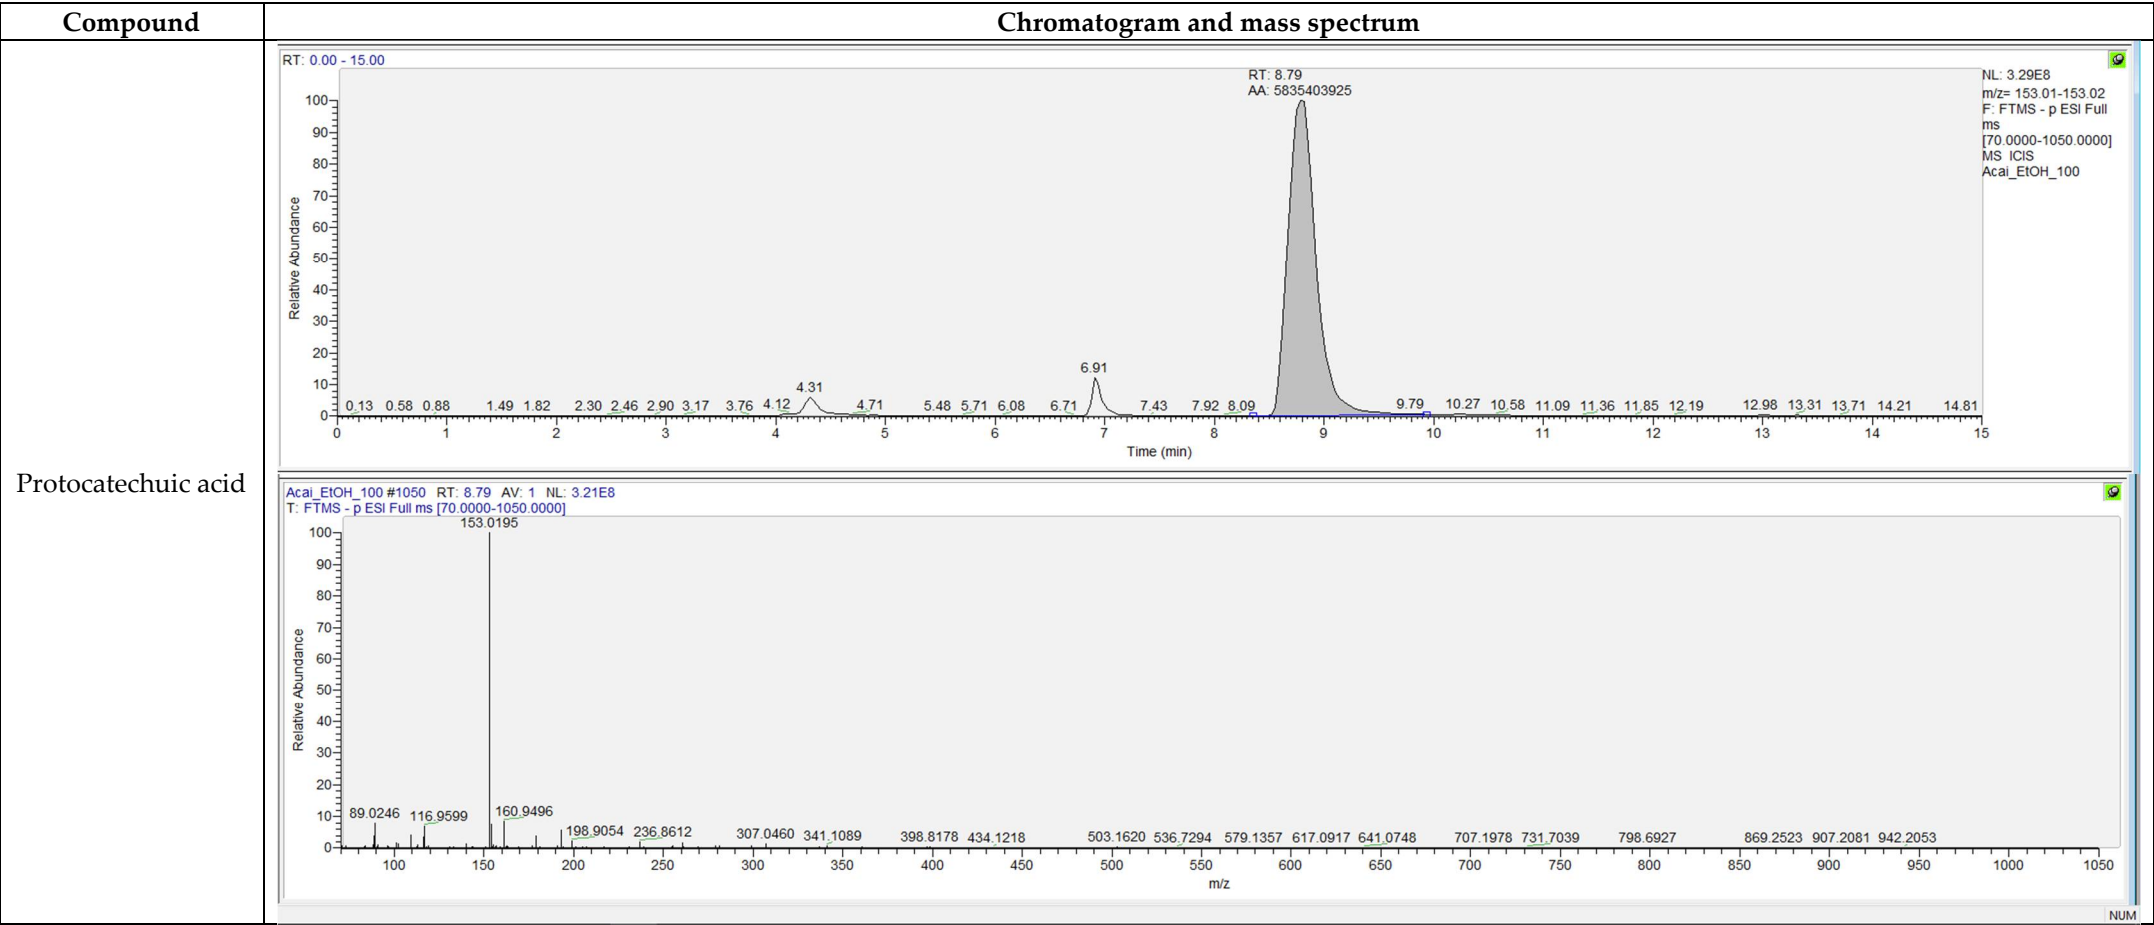

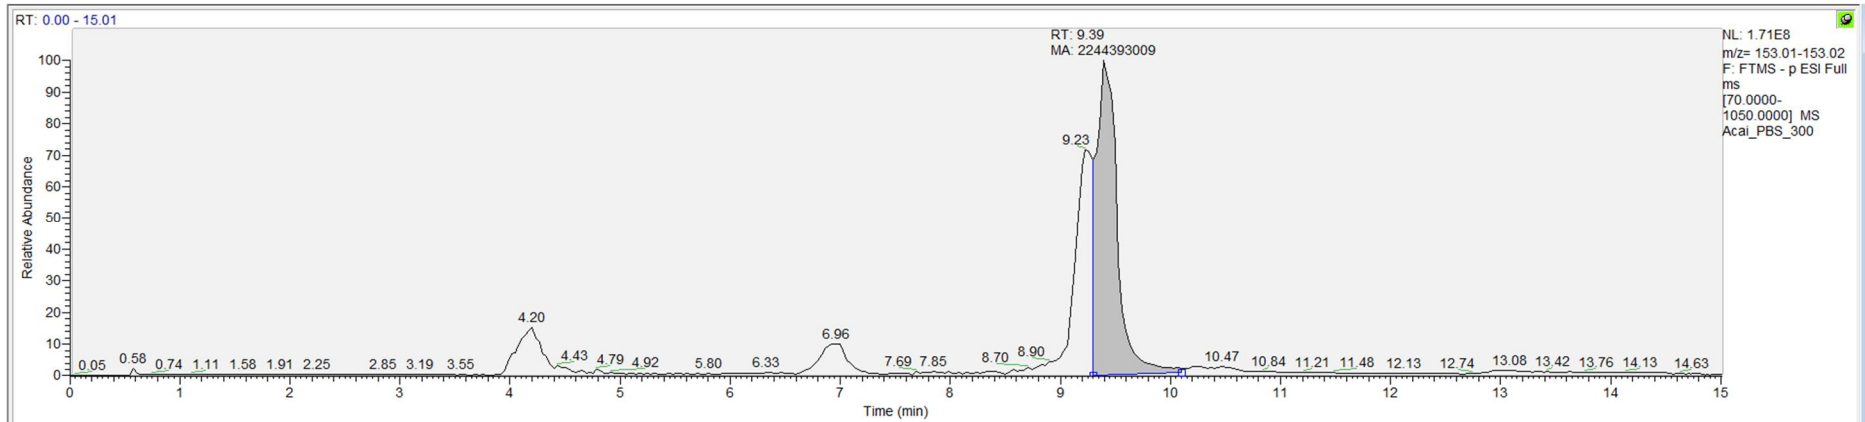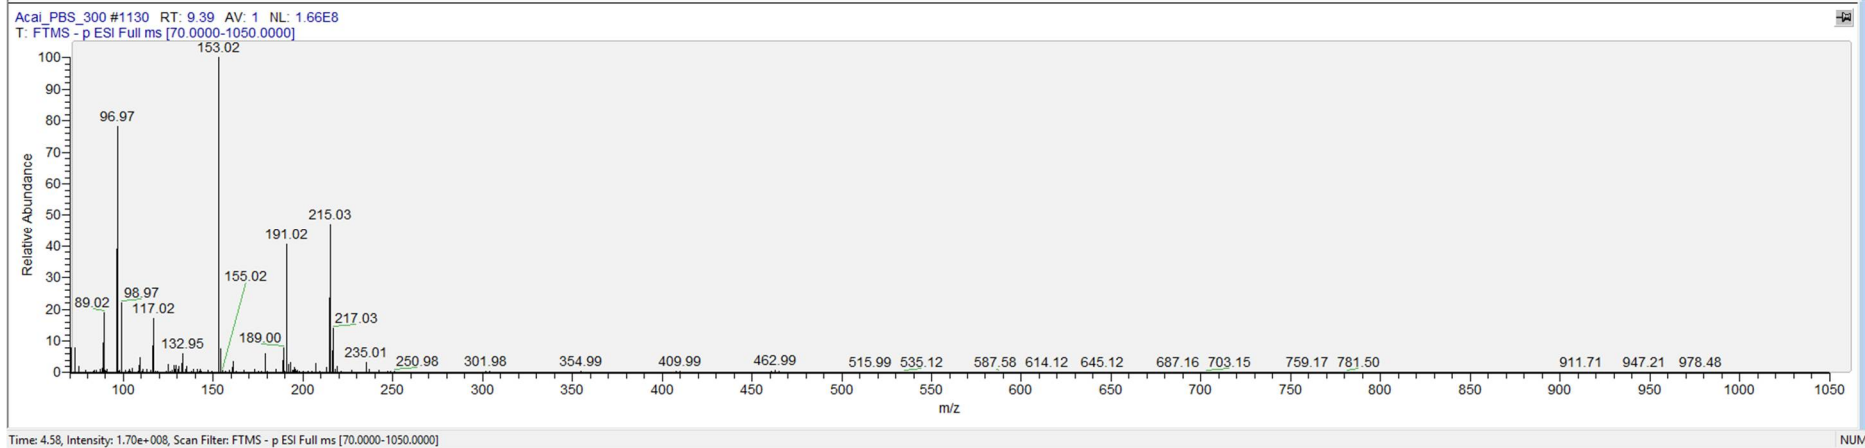

Syringic acid

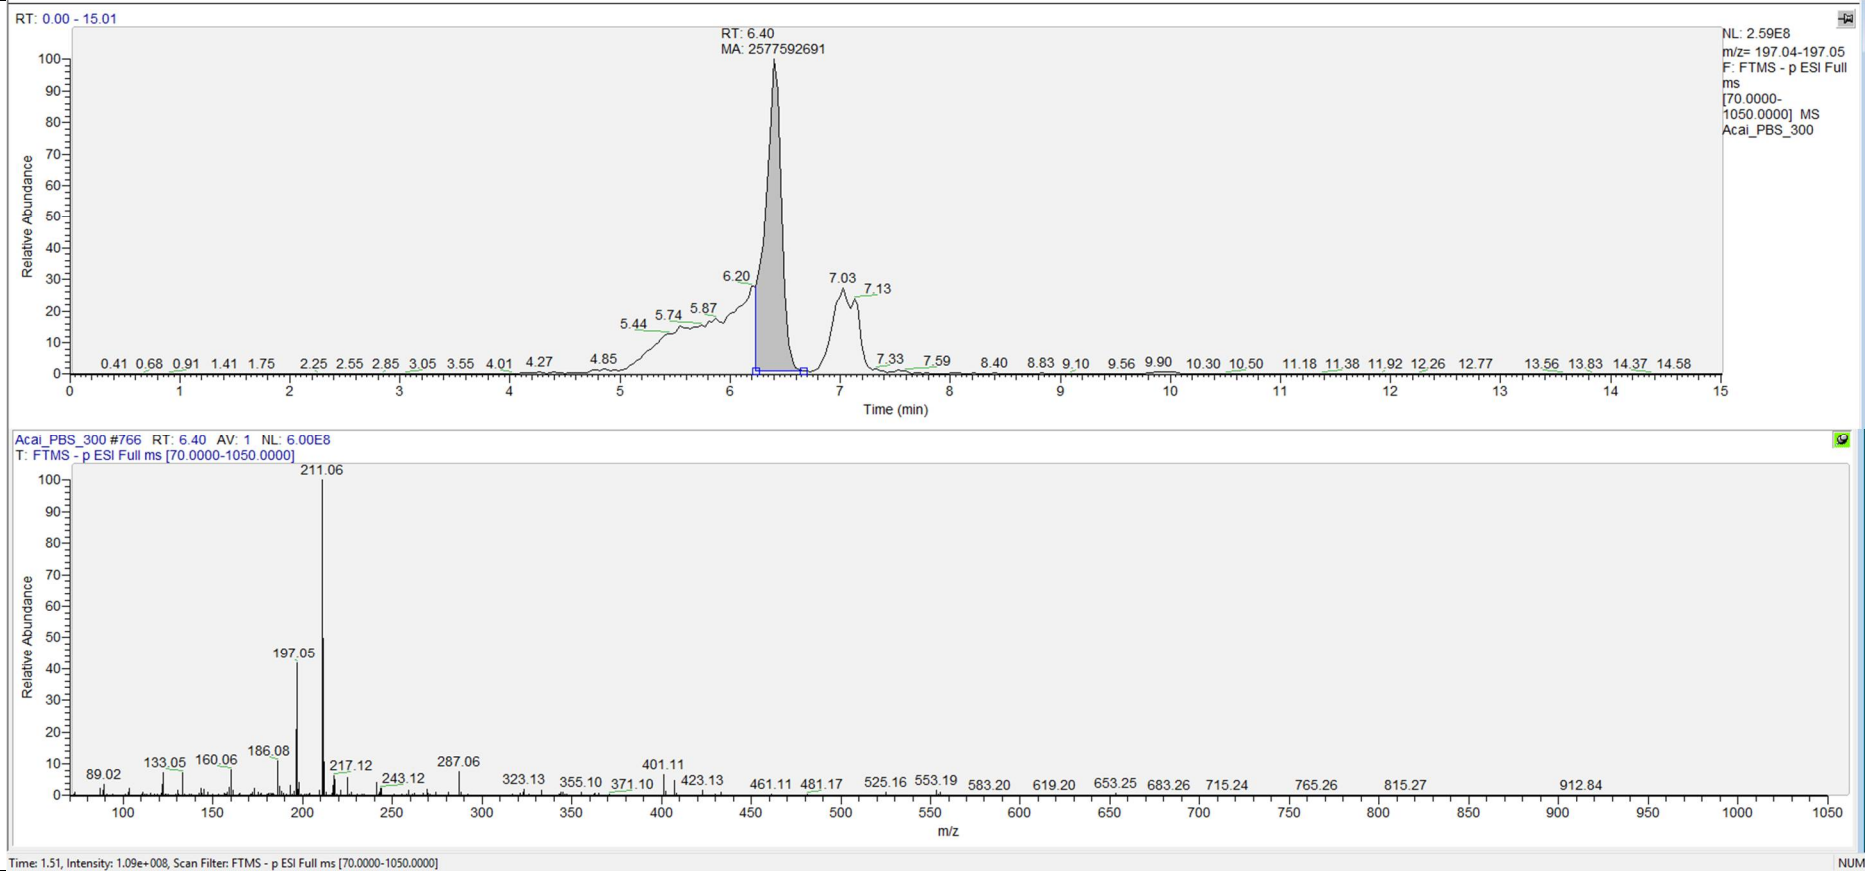

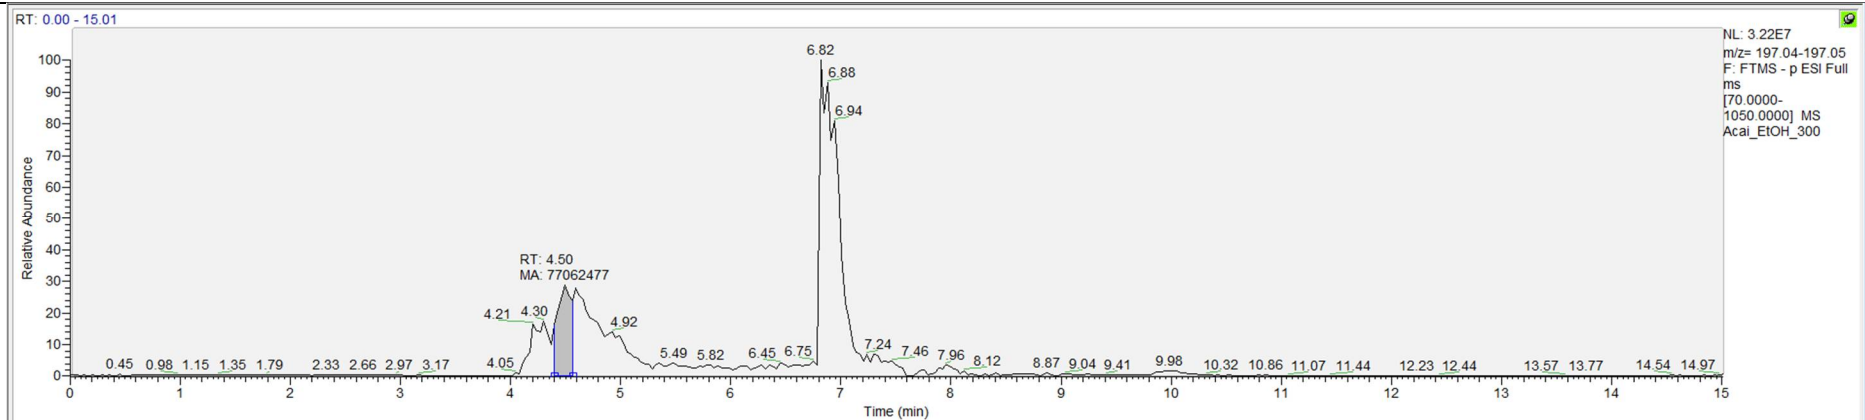

Acal\_EtOH\_300 #538 RT: 4.53 AV: 1 NL: 2.77E8  
T: FTMS - p ESI Full ms [70.0000-1050.0000]

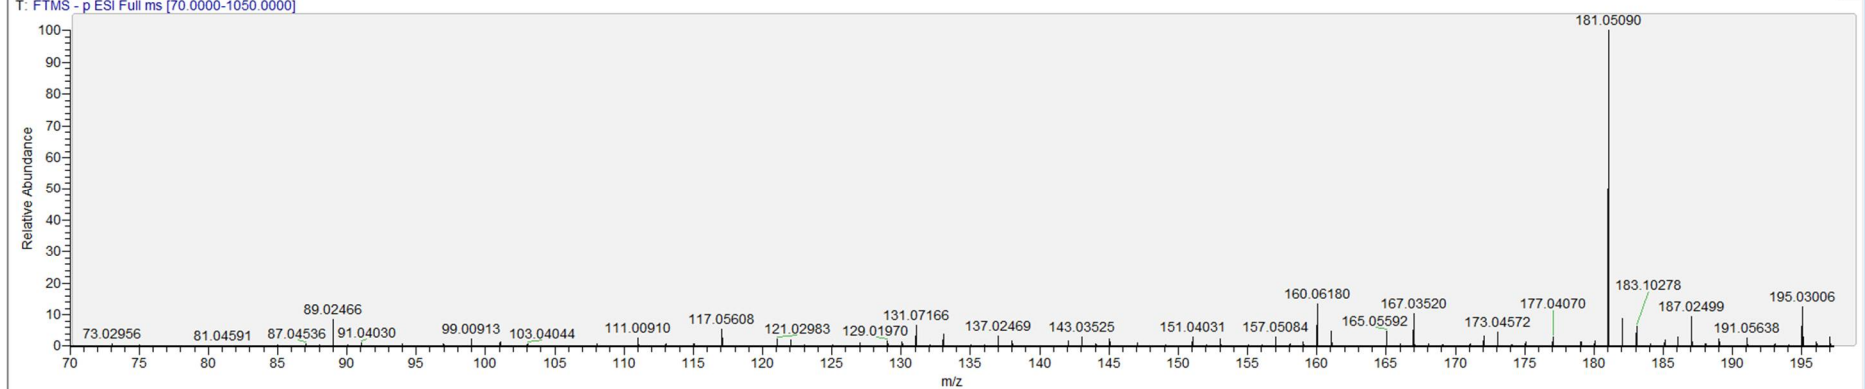



Vanillic acid

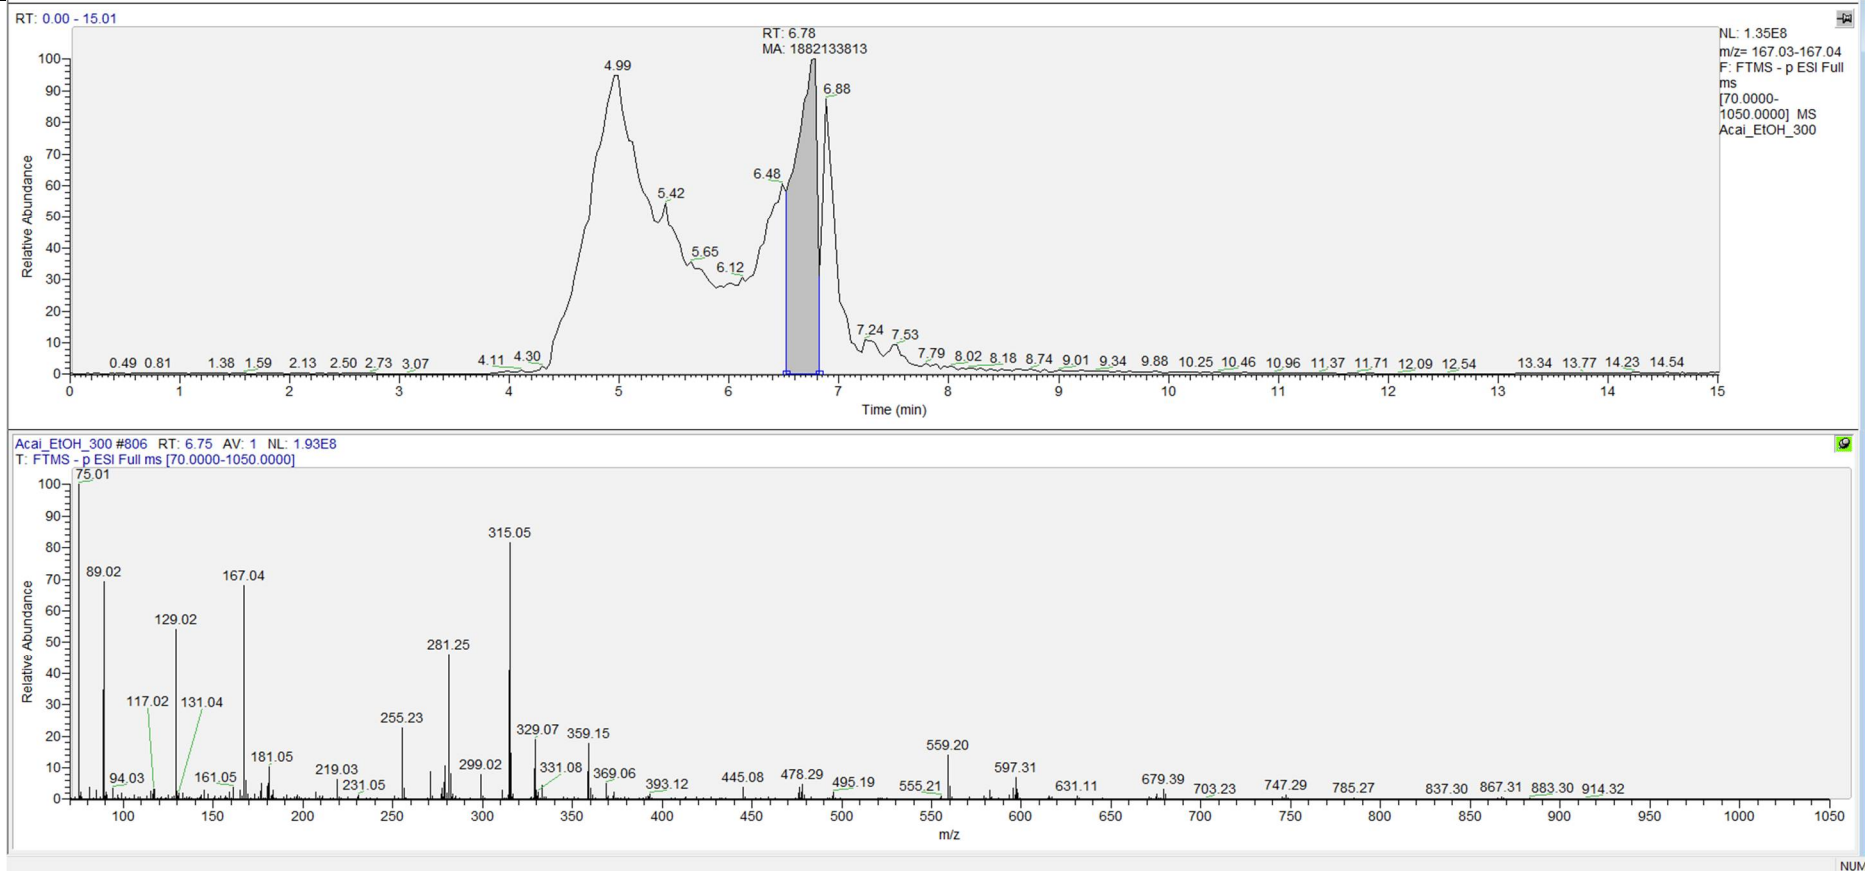

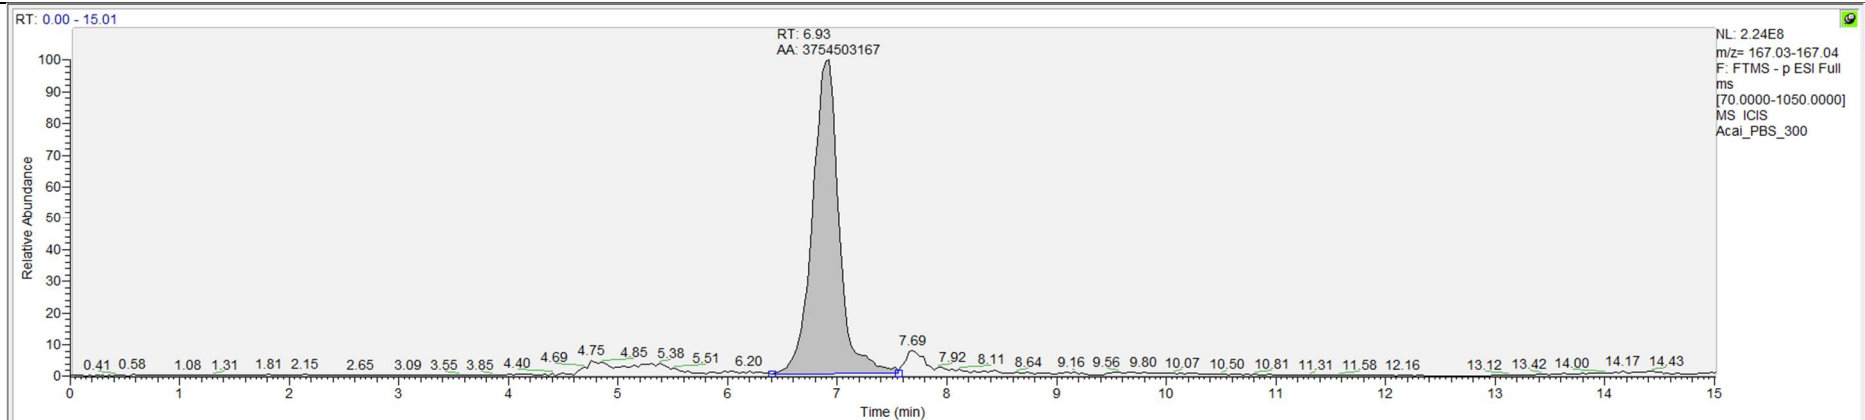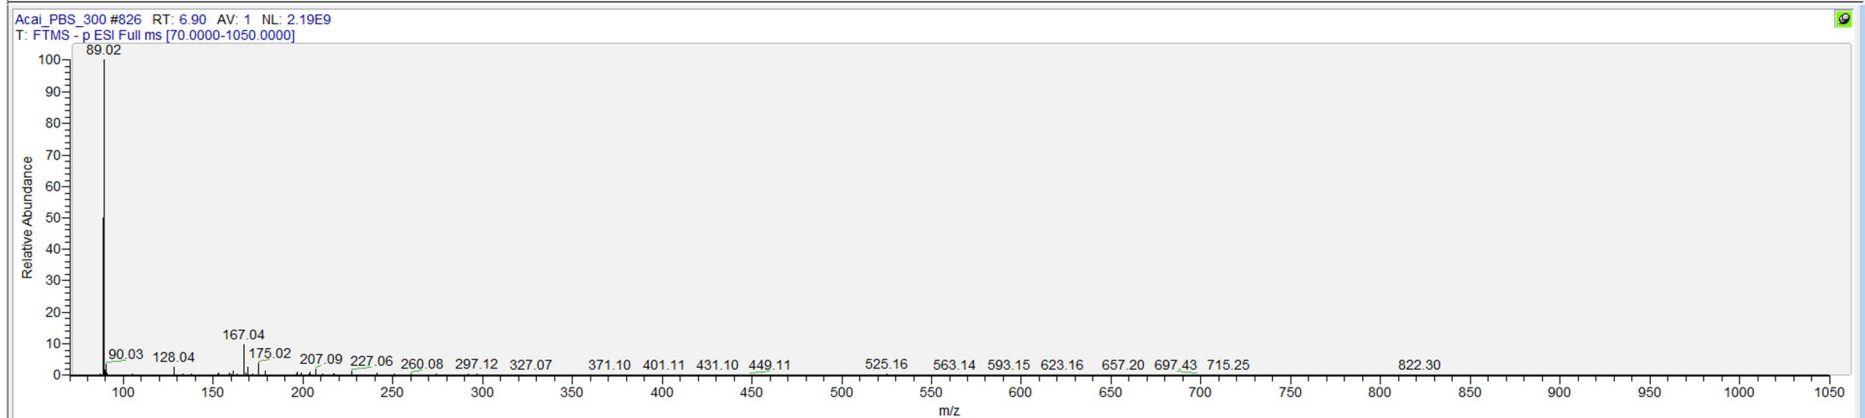

Gallic acid

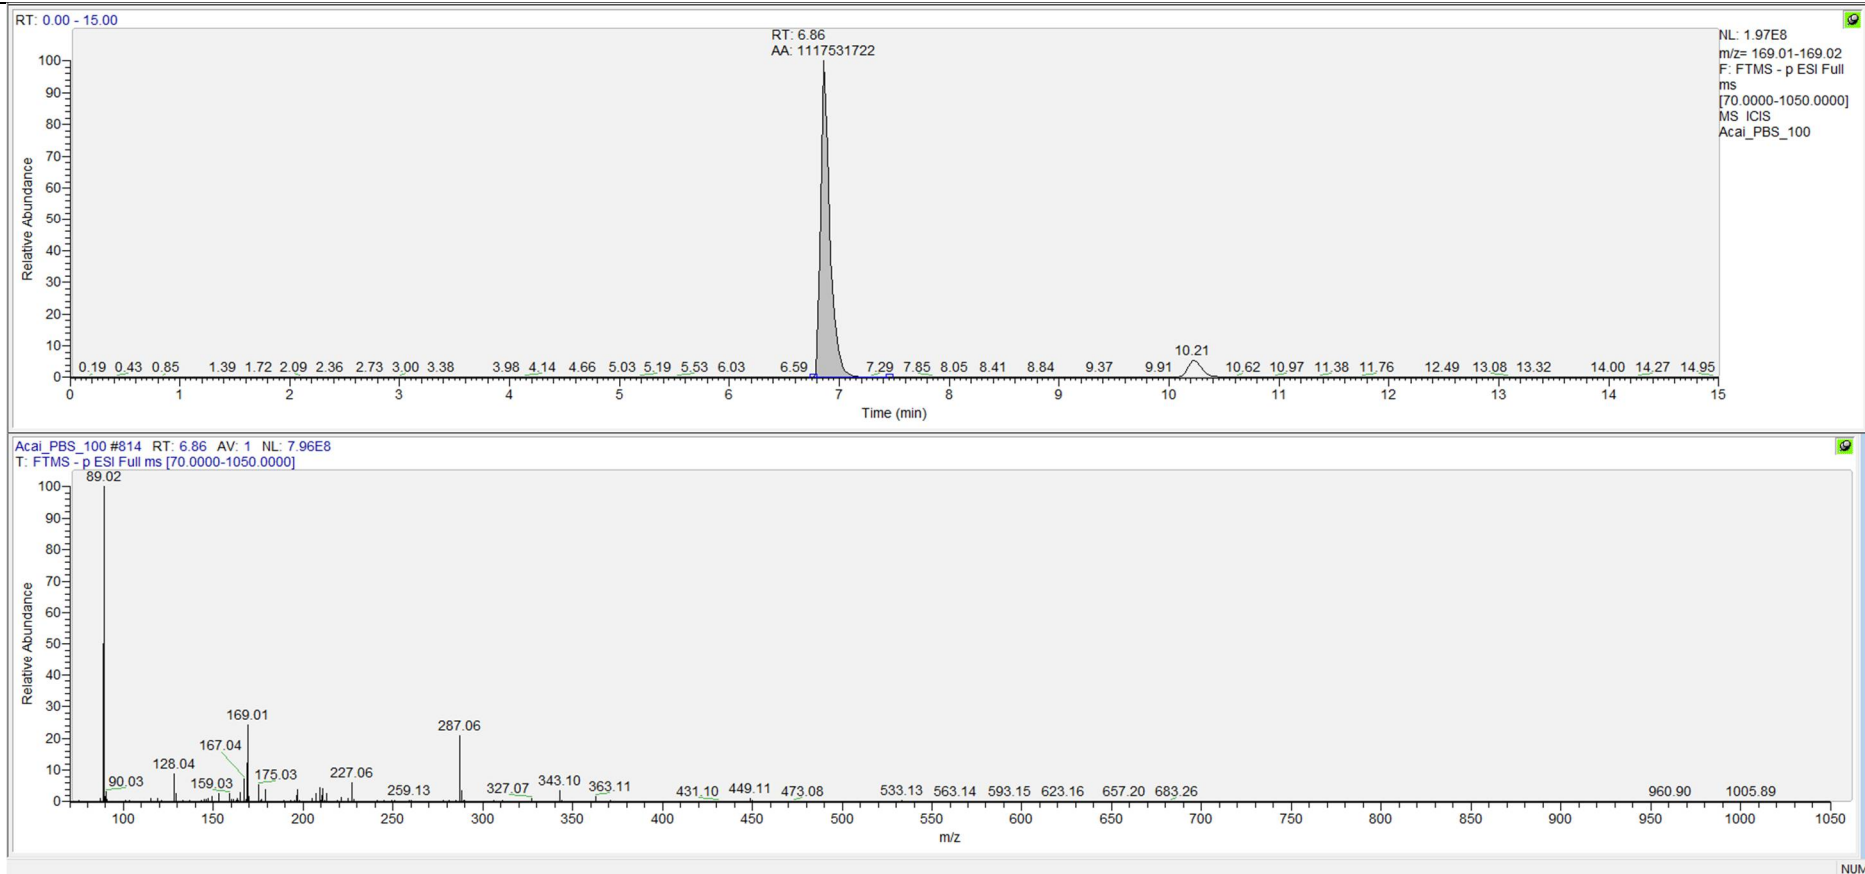

4-Hydroxybenzoic  
acid

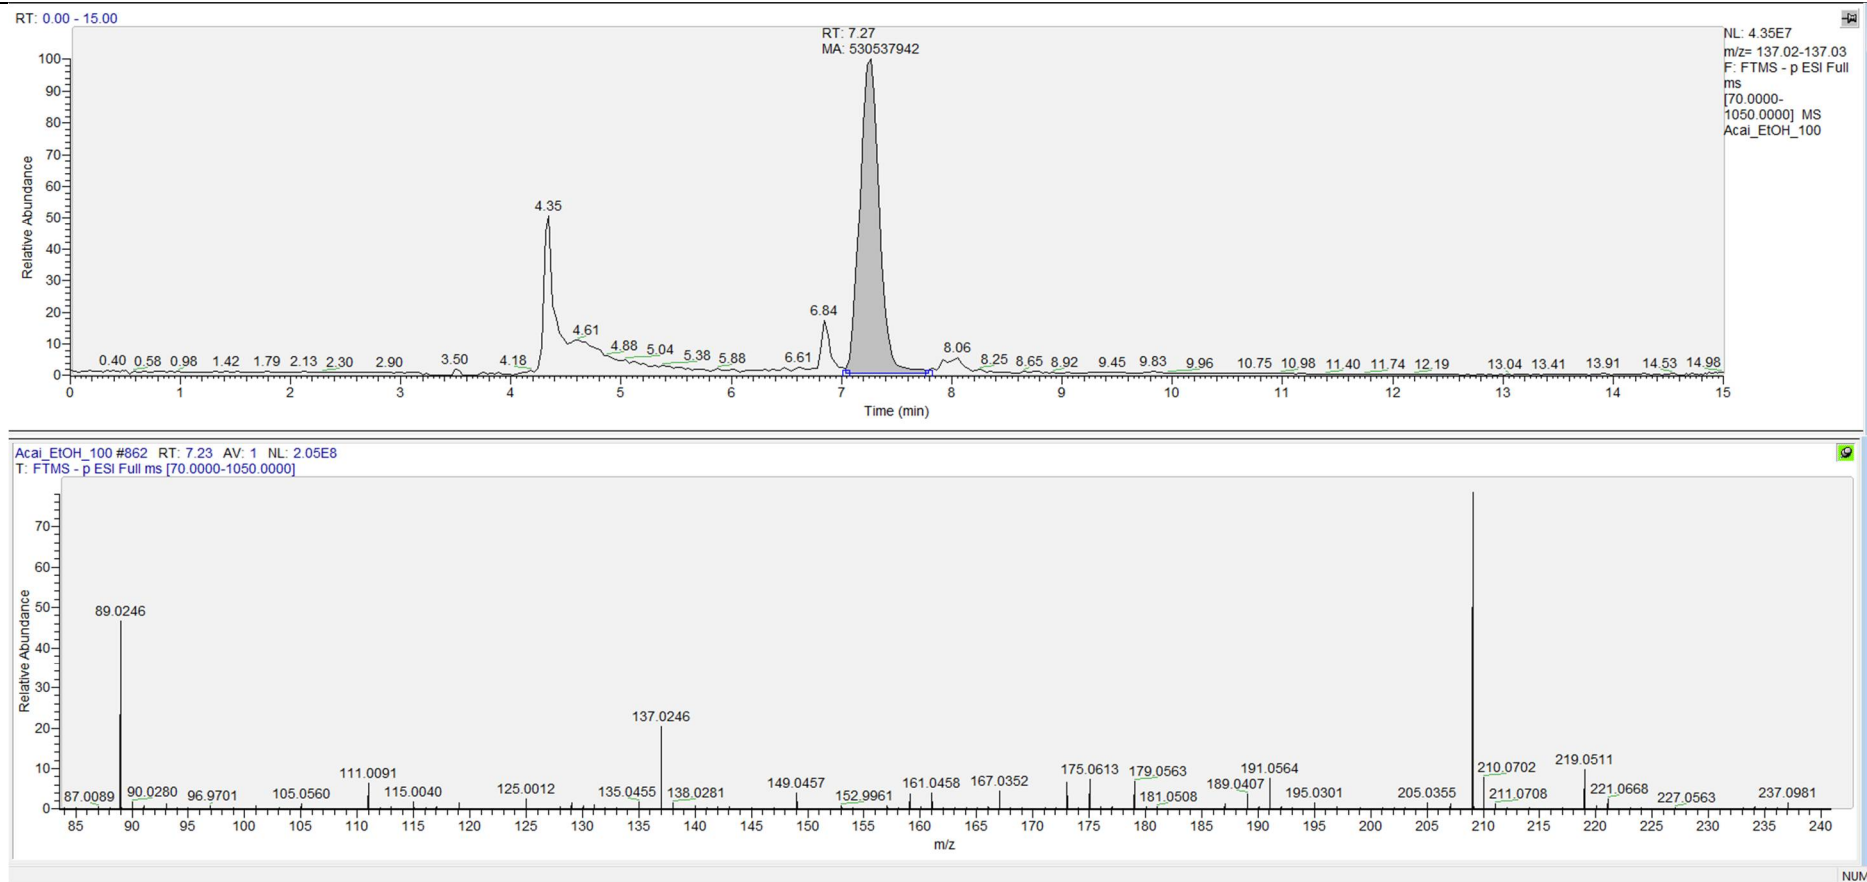

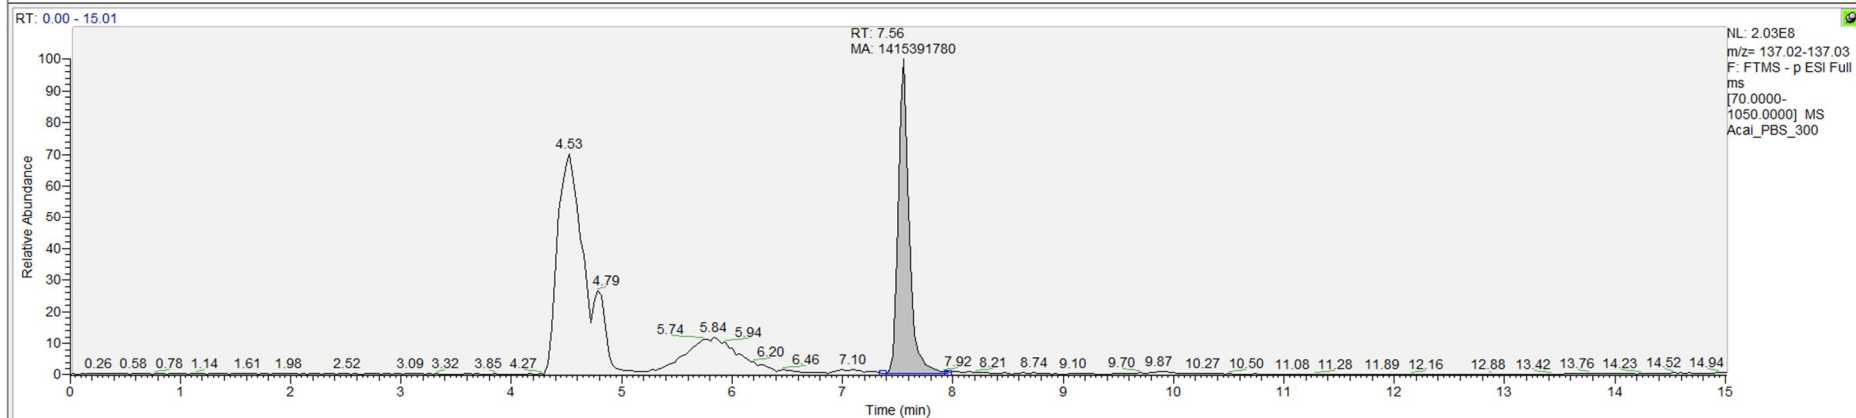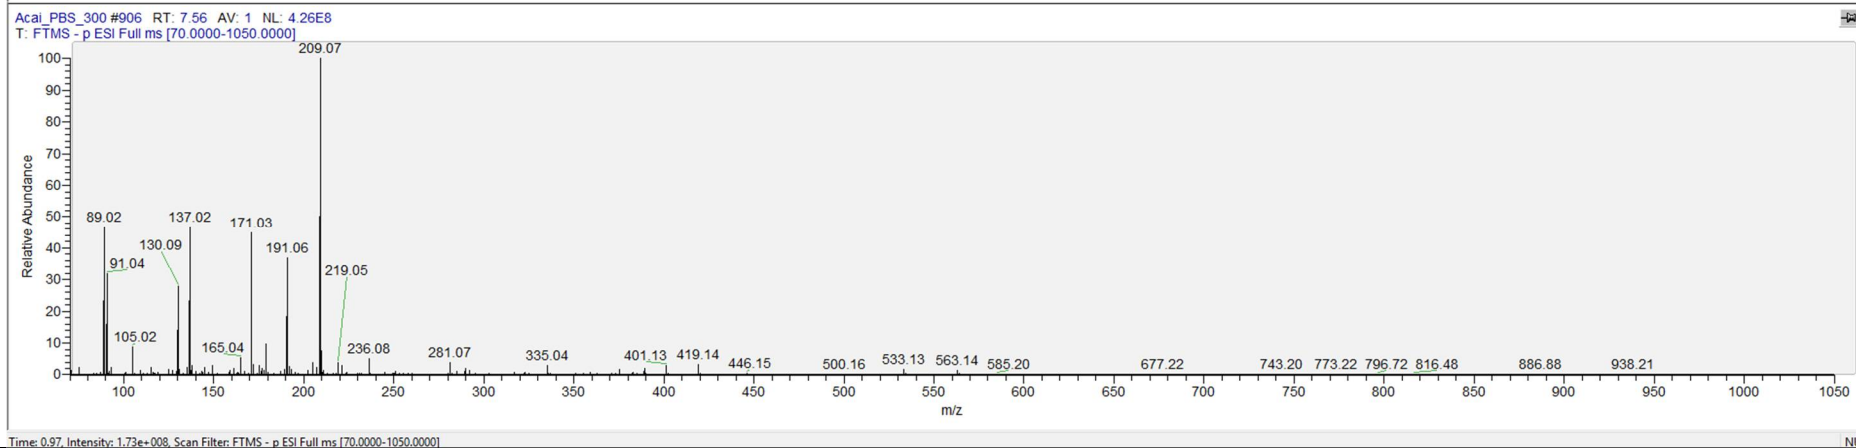

Benzoic acid

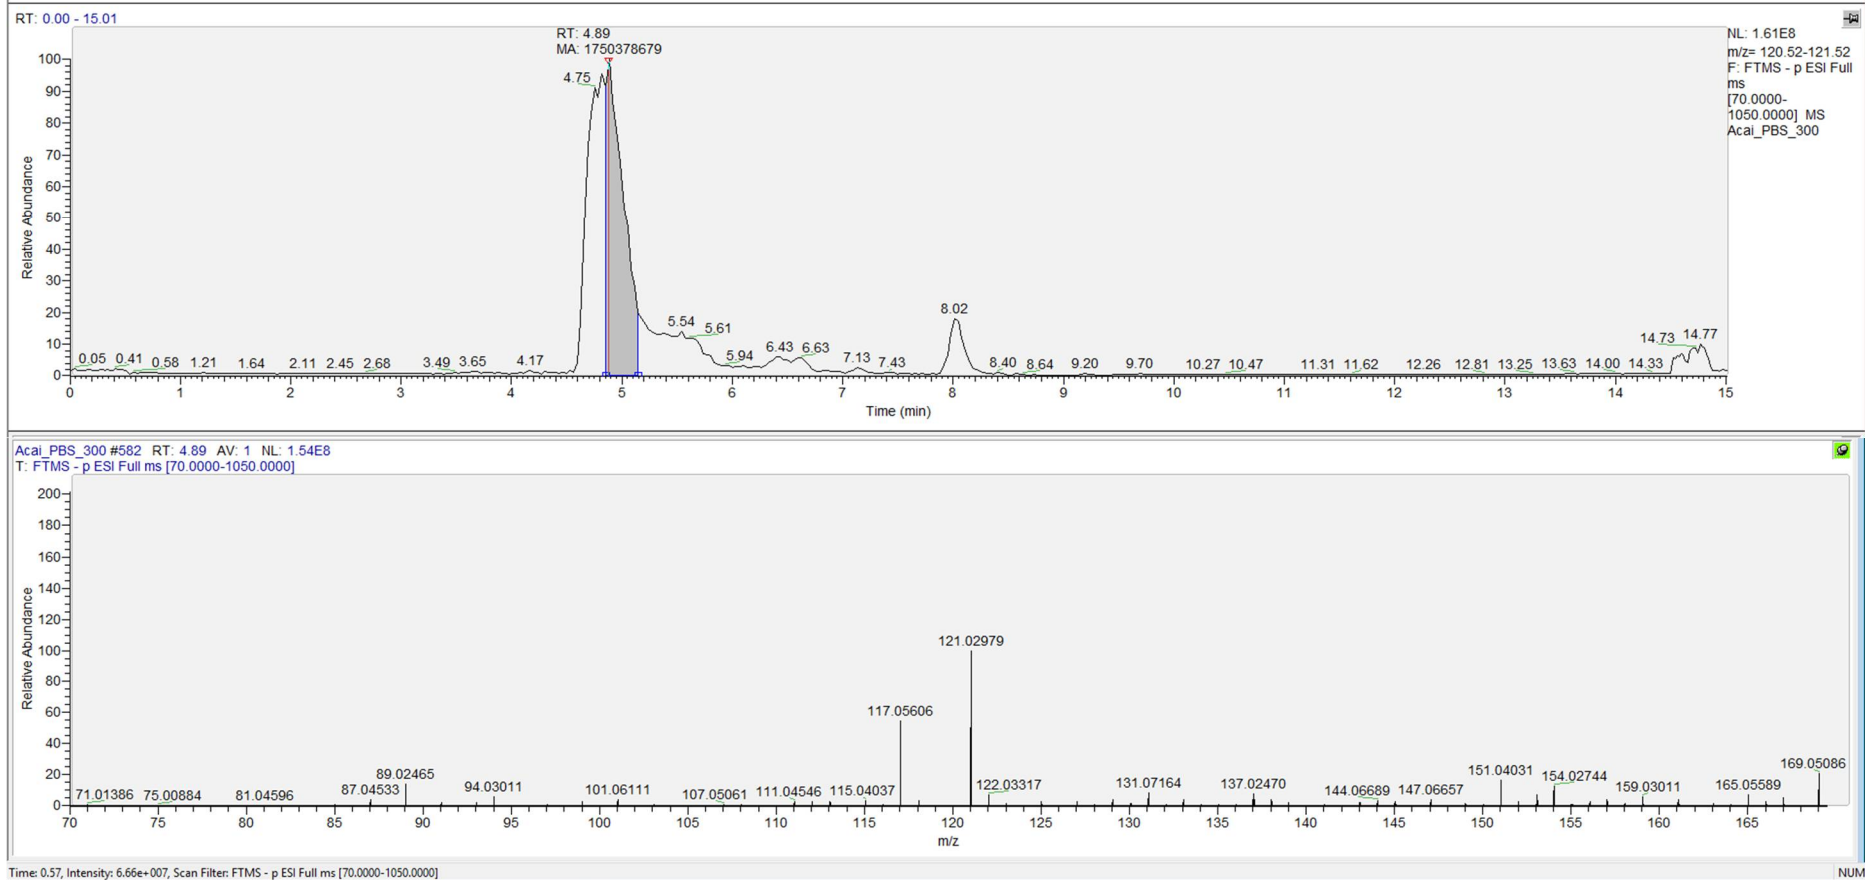

2,5-  
Dihydroxybenzoic  
acid

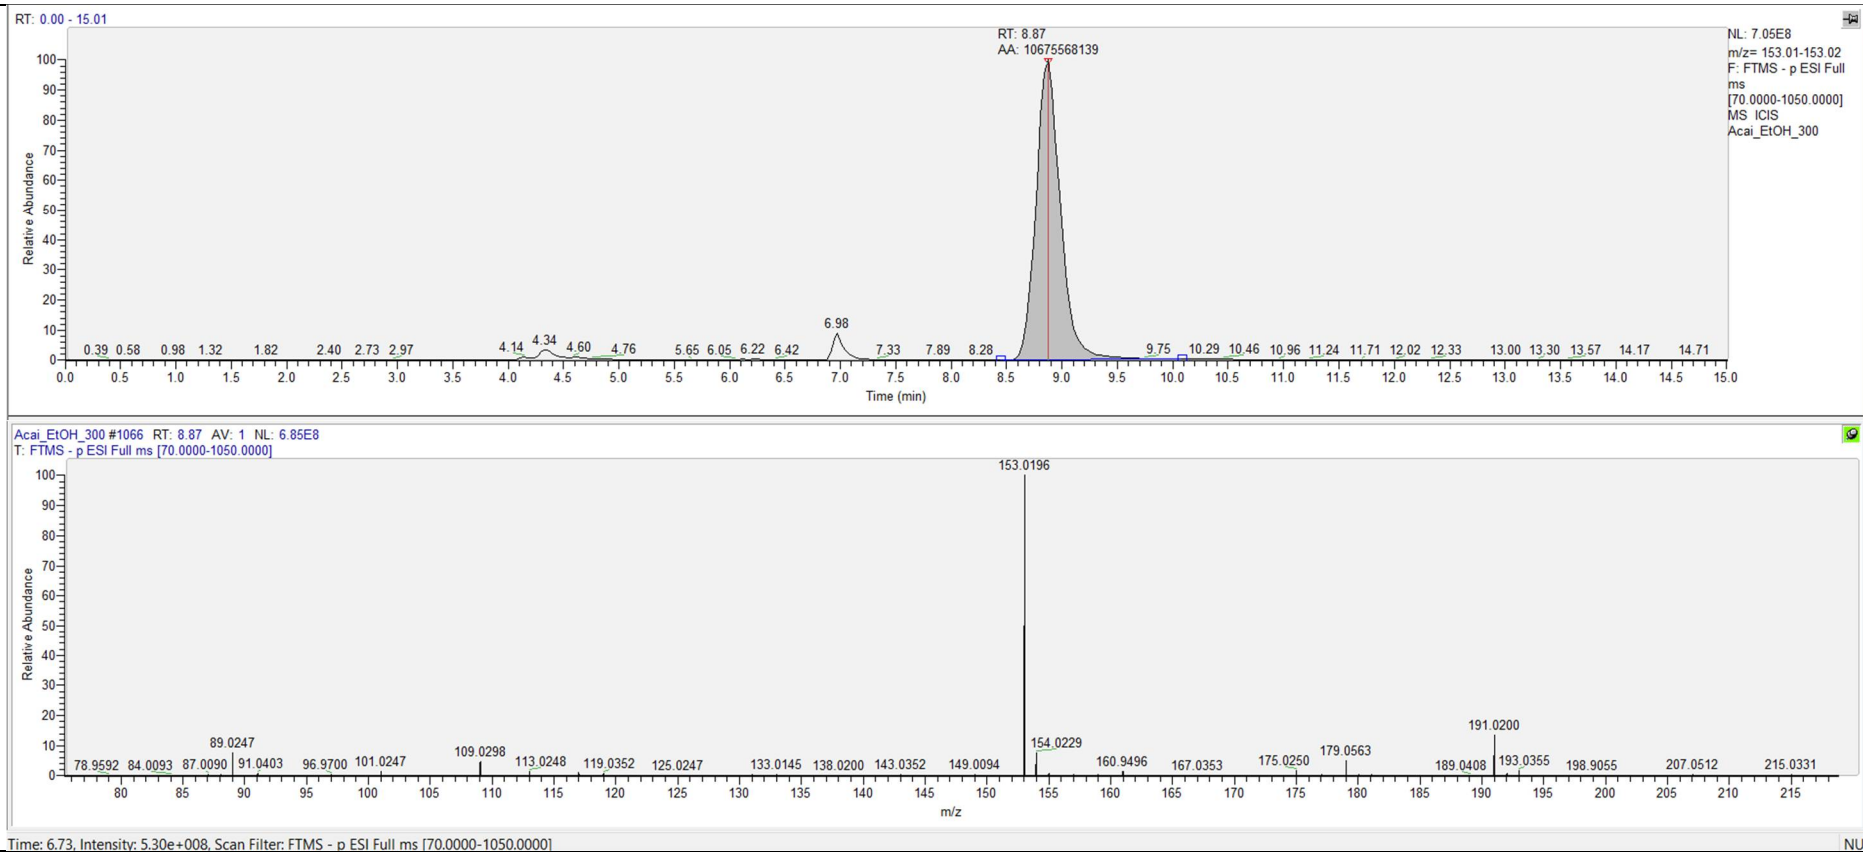

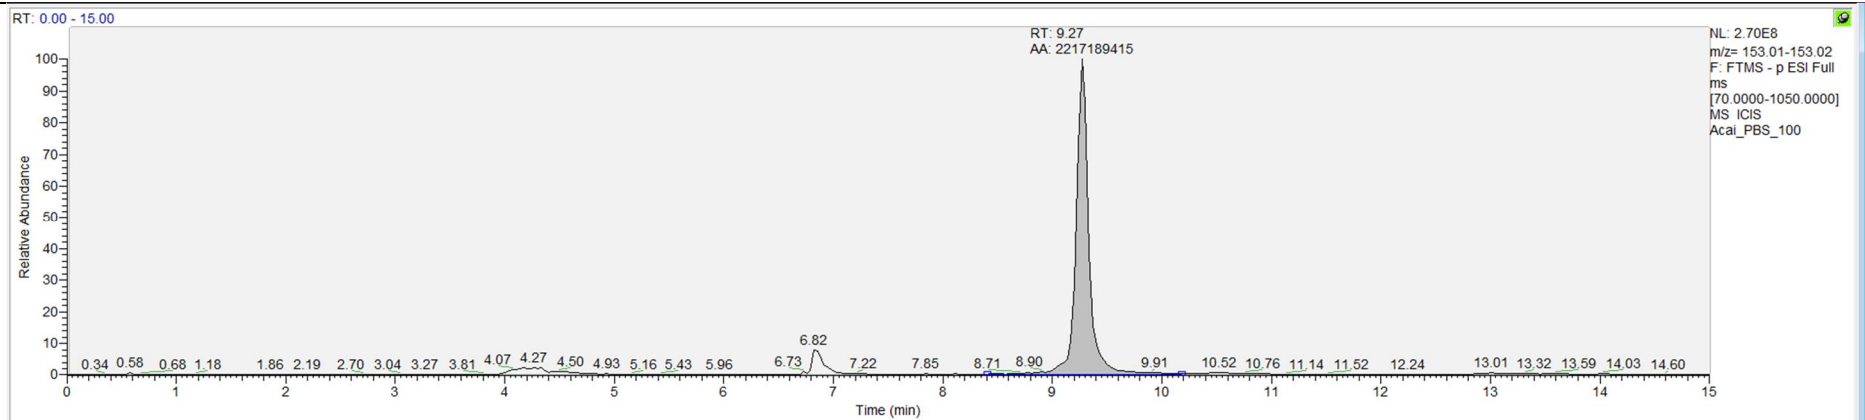

Acal\_PBS\_100 #1106 RT: 9.27 AV: 1 NL: 2.61E8  
T: FTMS - p ESI Full ms [70.0000-1050.0000]

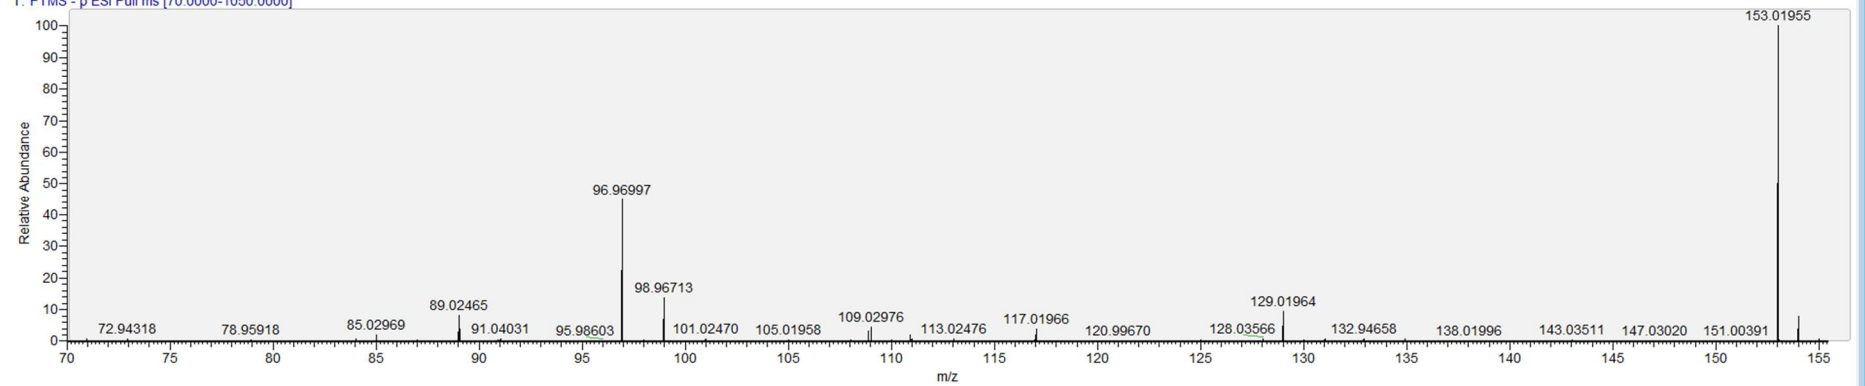



Chlorogenic acid

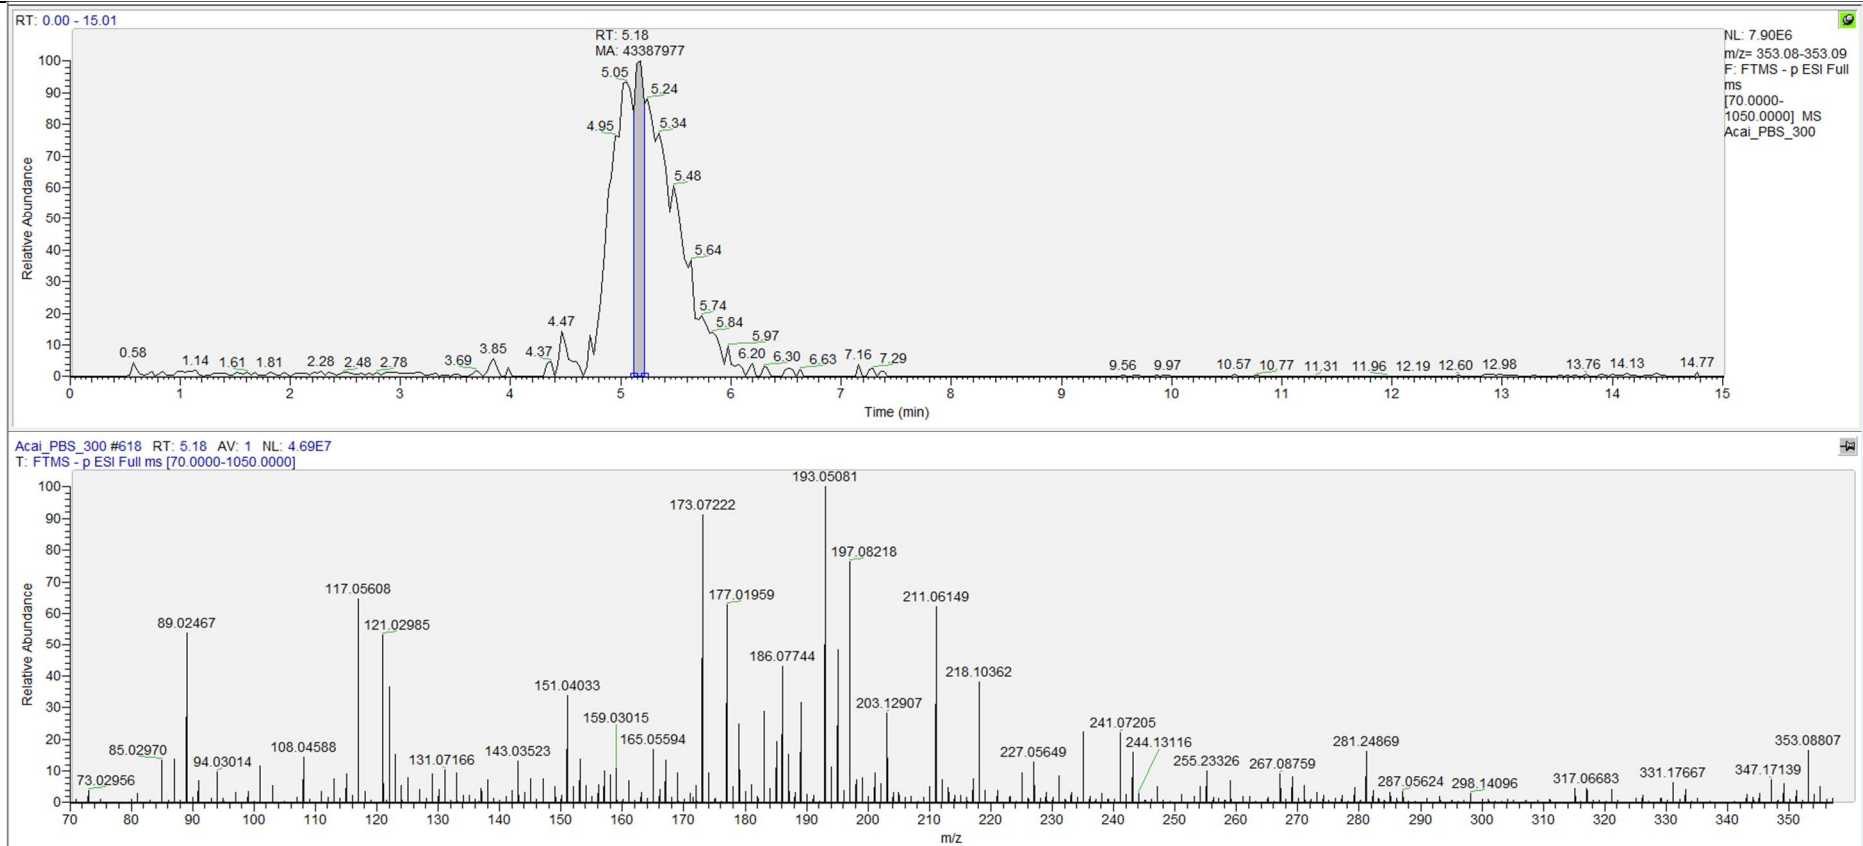

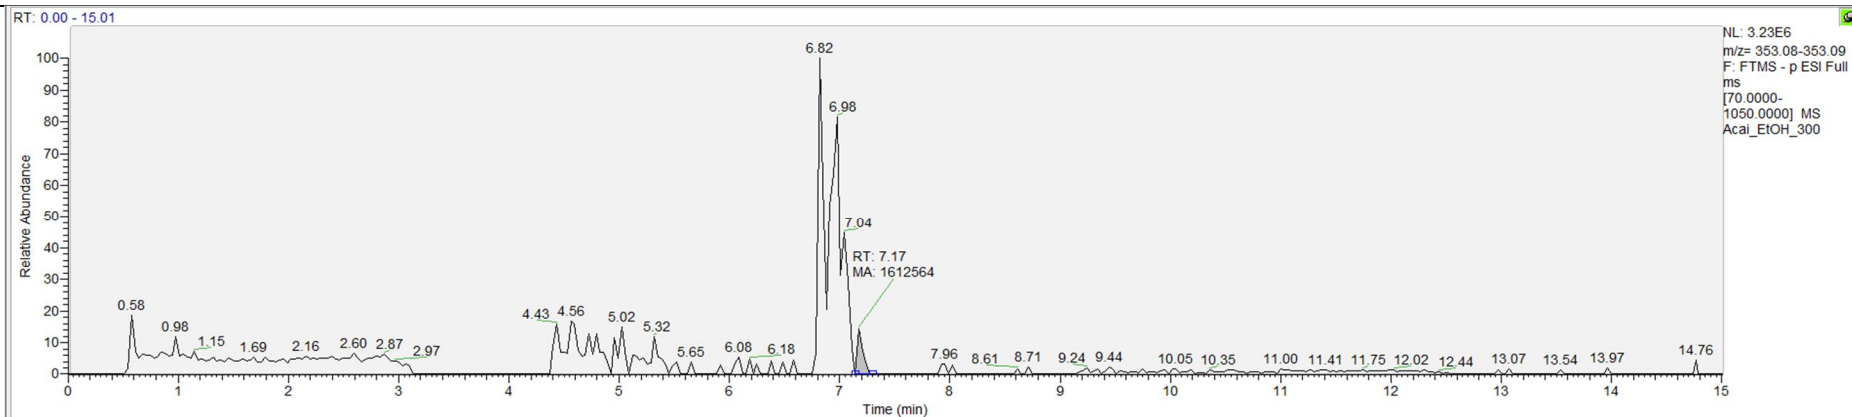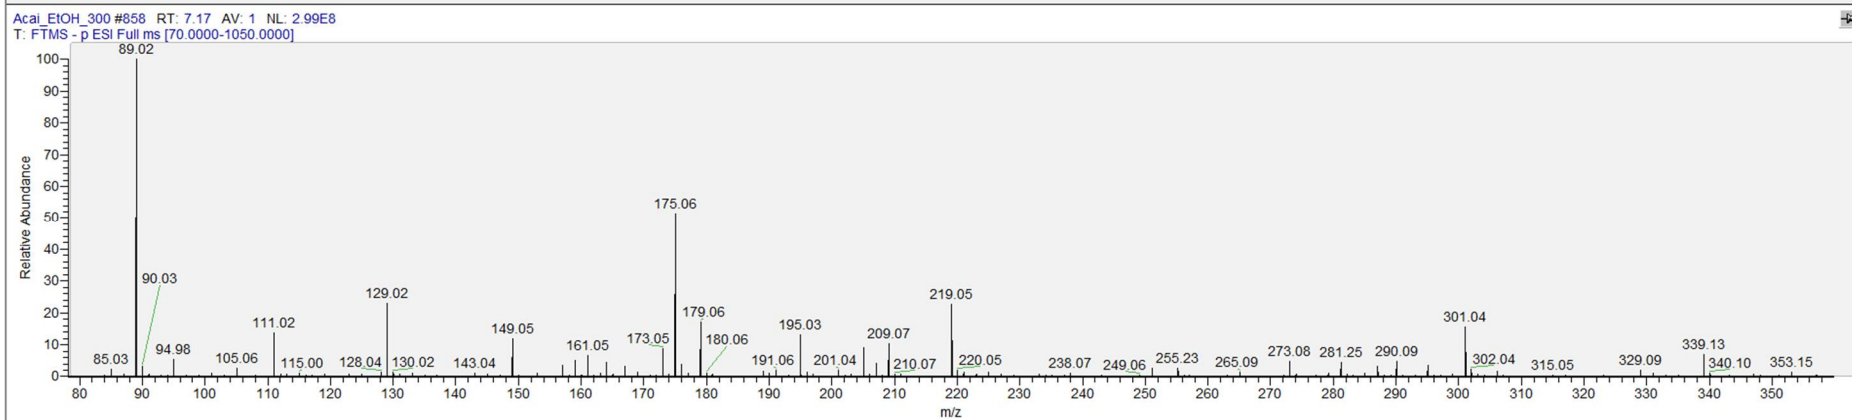

Dihydrokaempferol

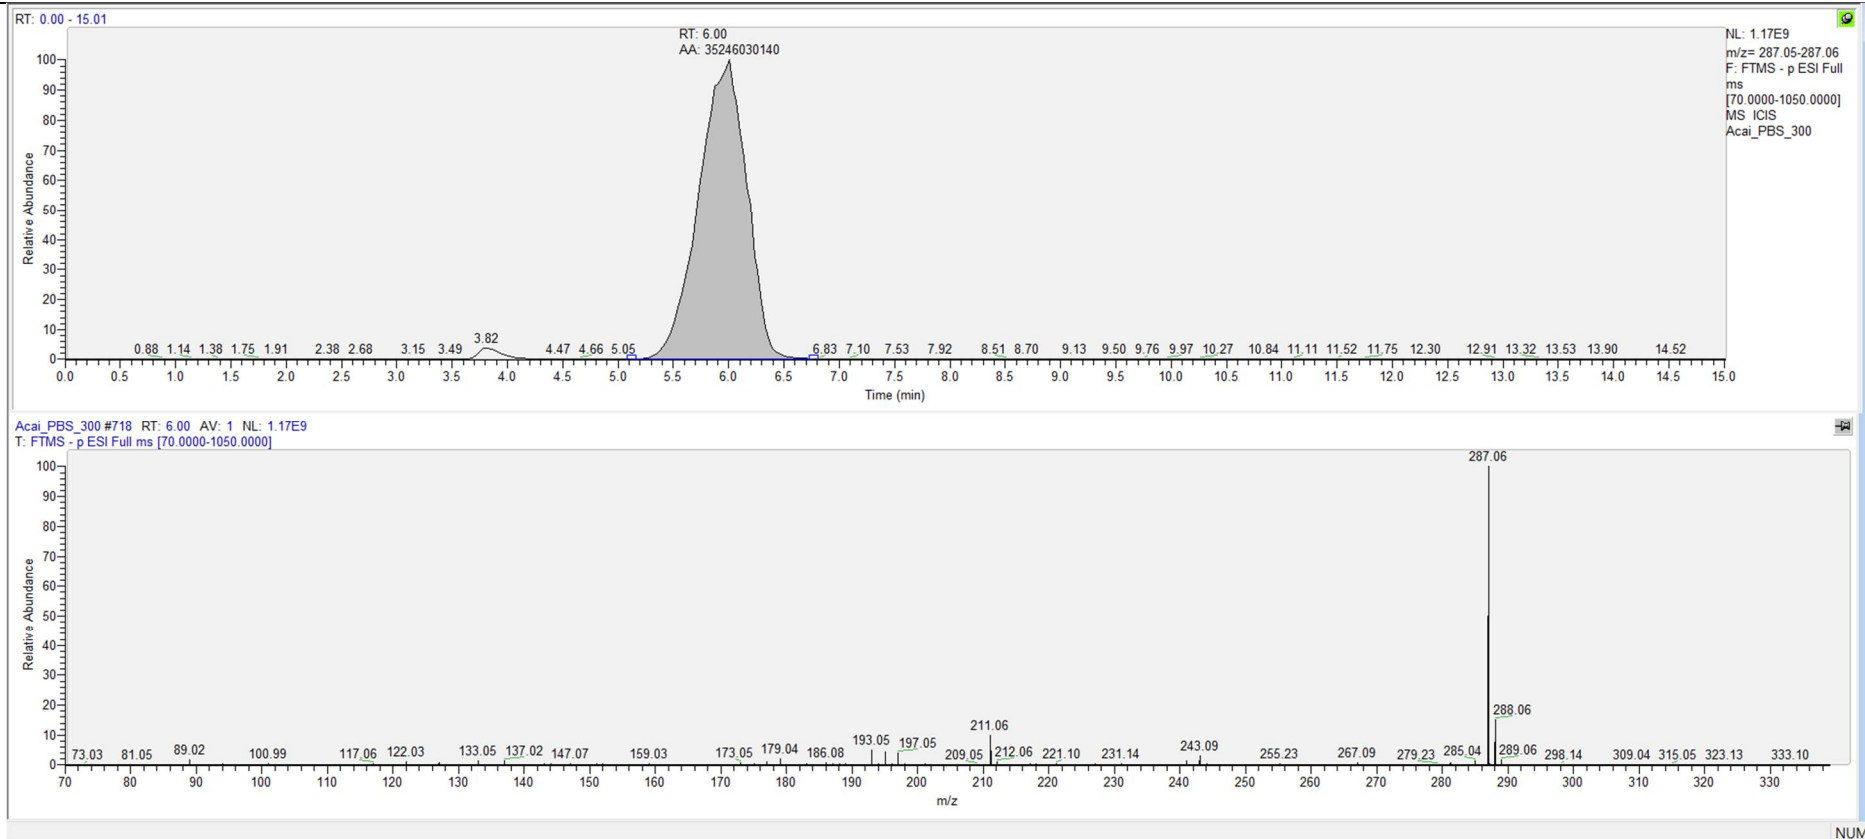

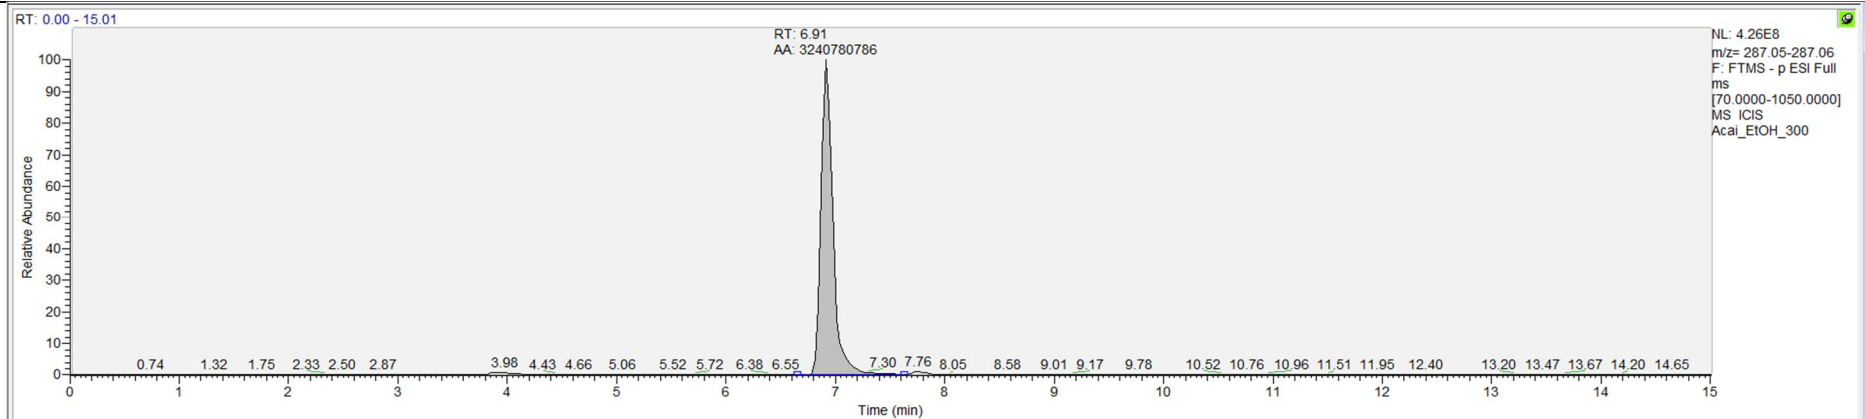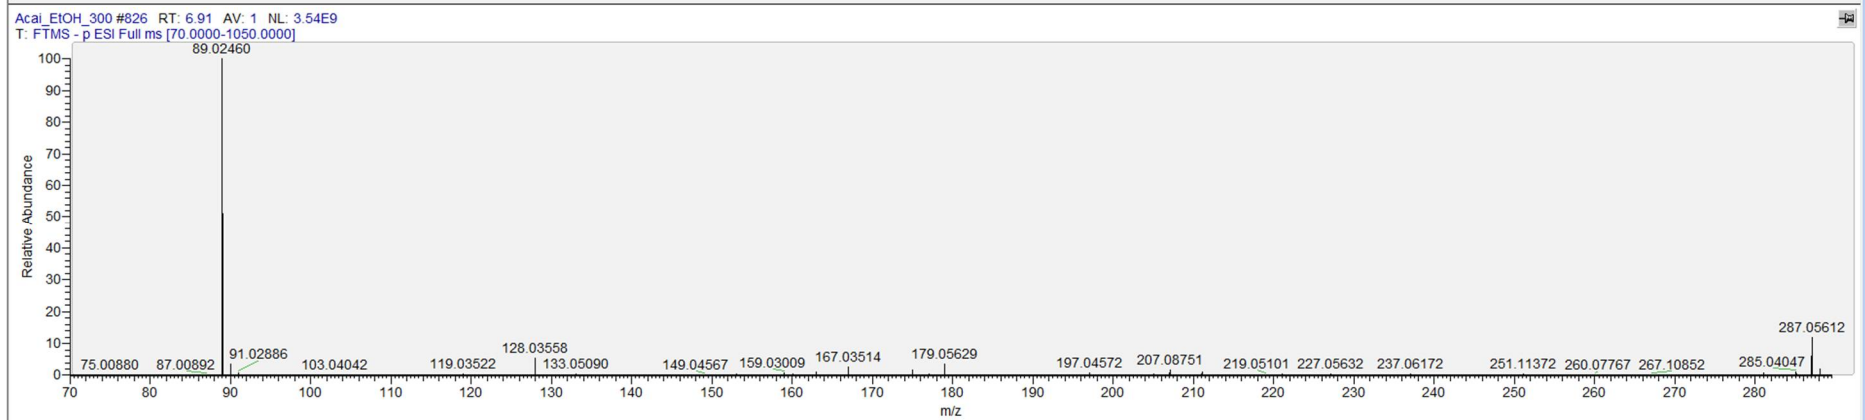

Luteolin

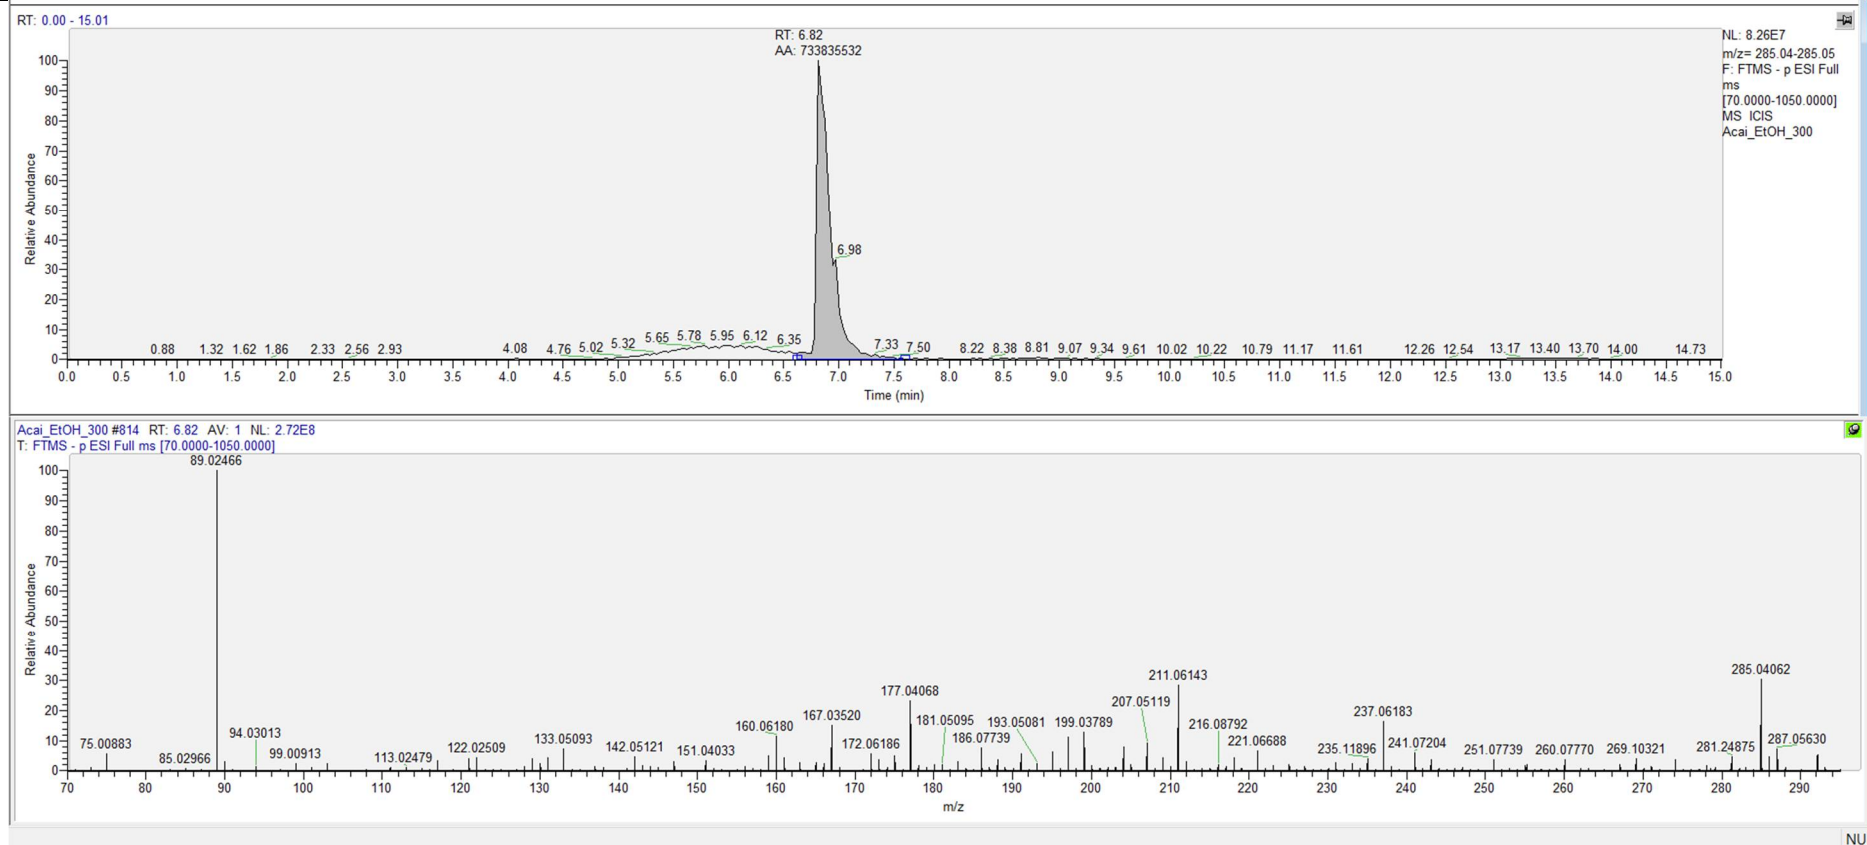

Quercetin

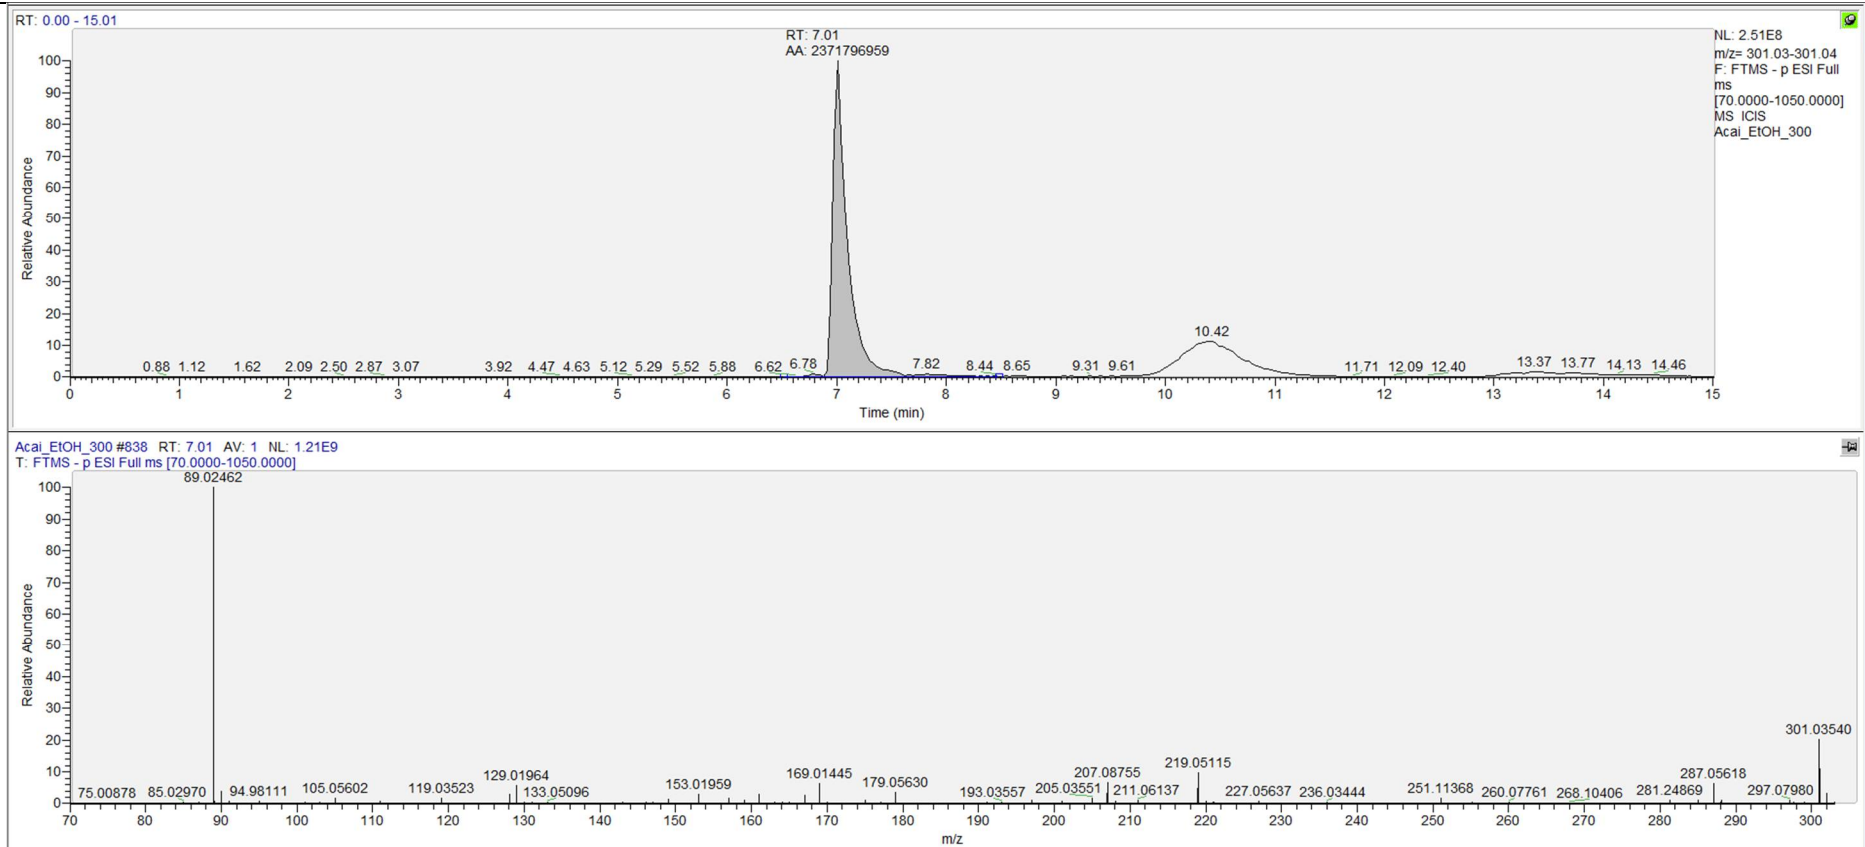

Taxifolin  
deoxyhexose or  
Taxifolin

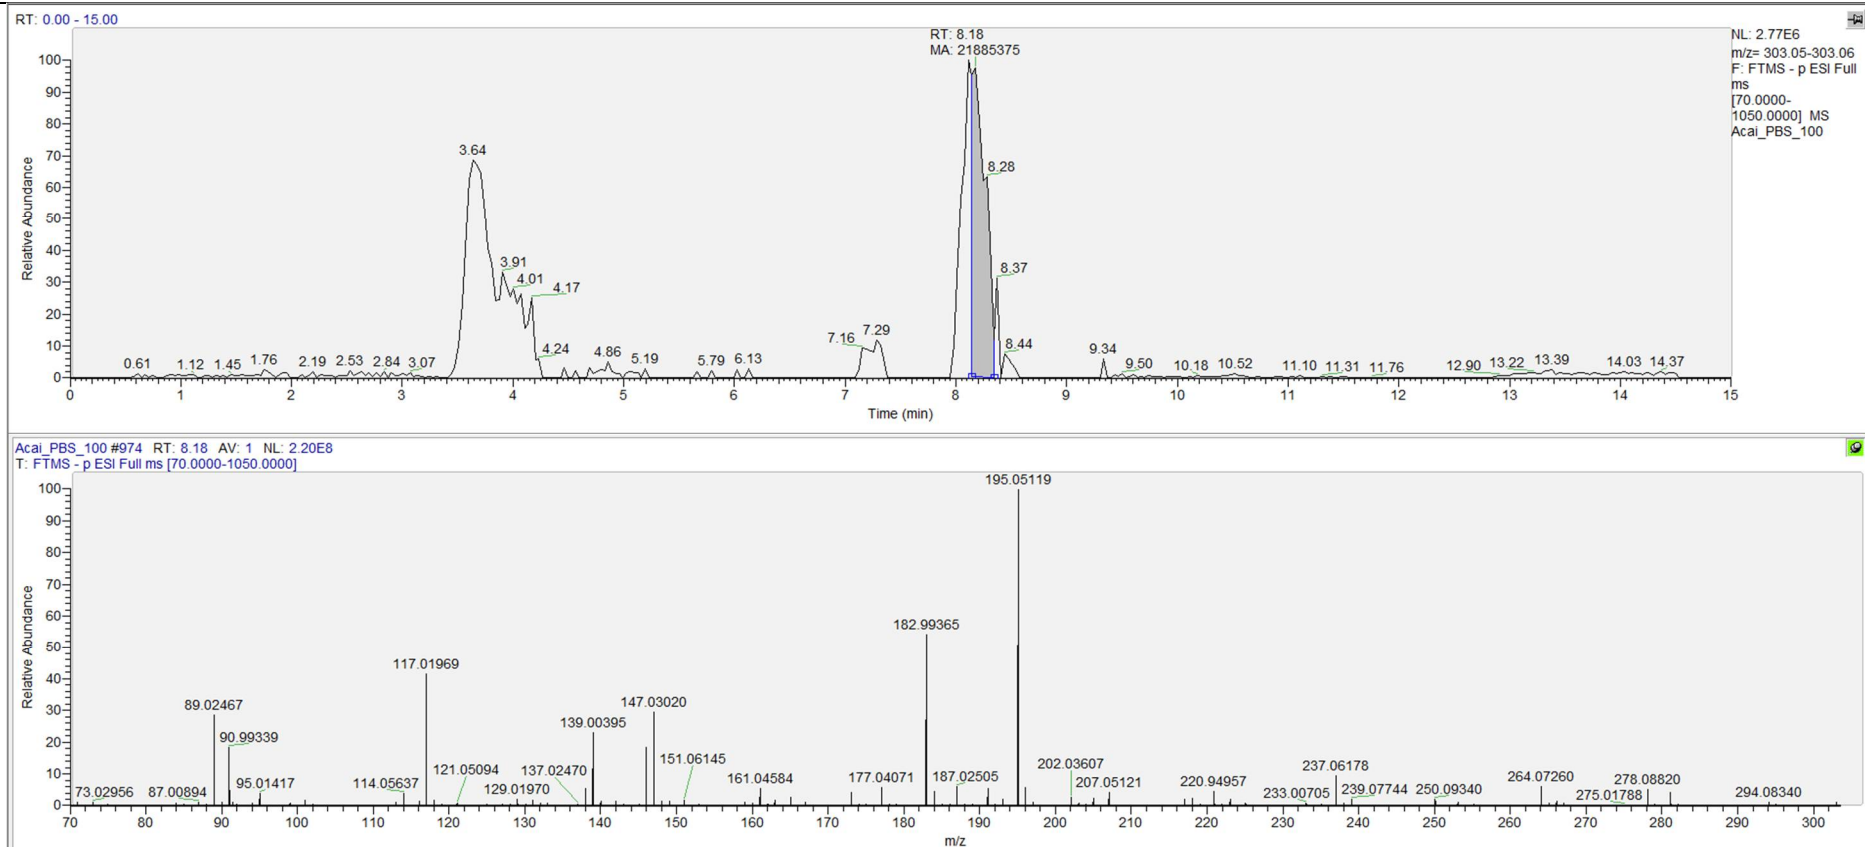

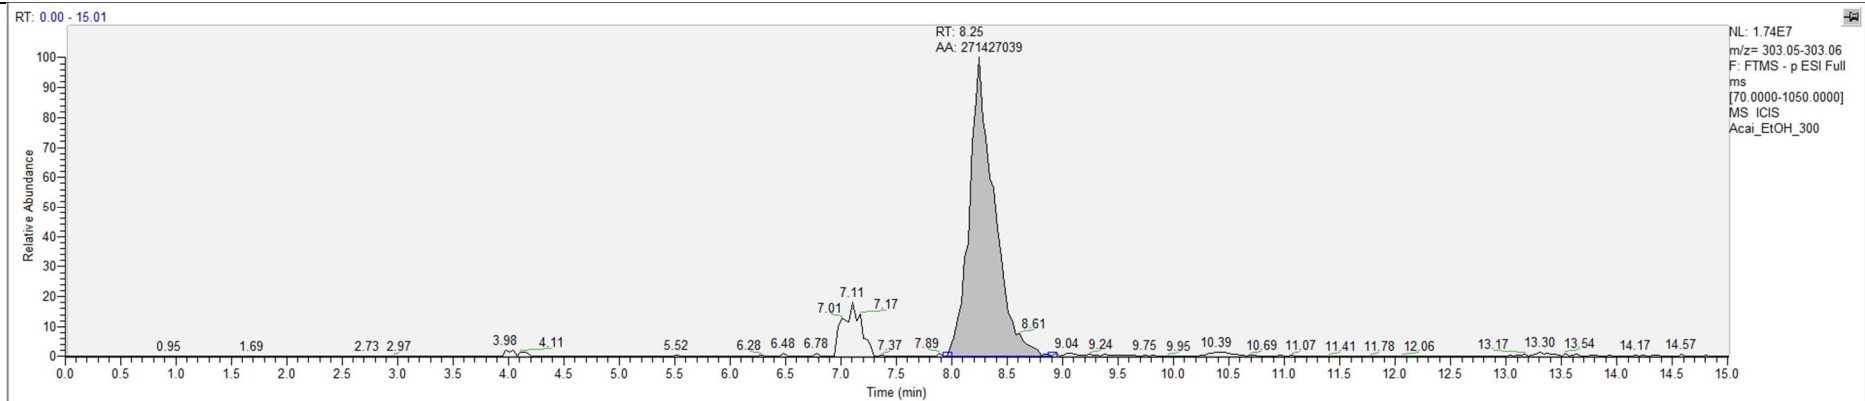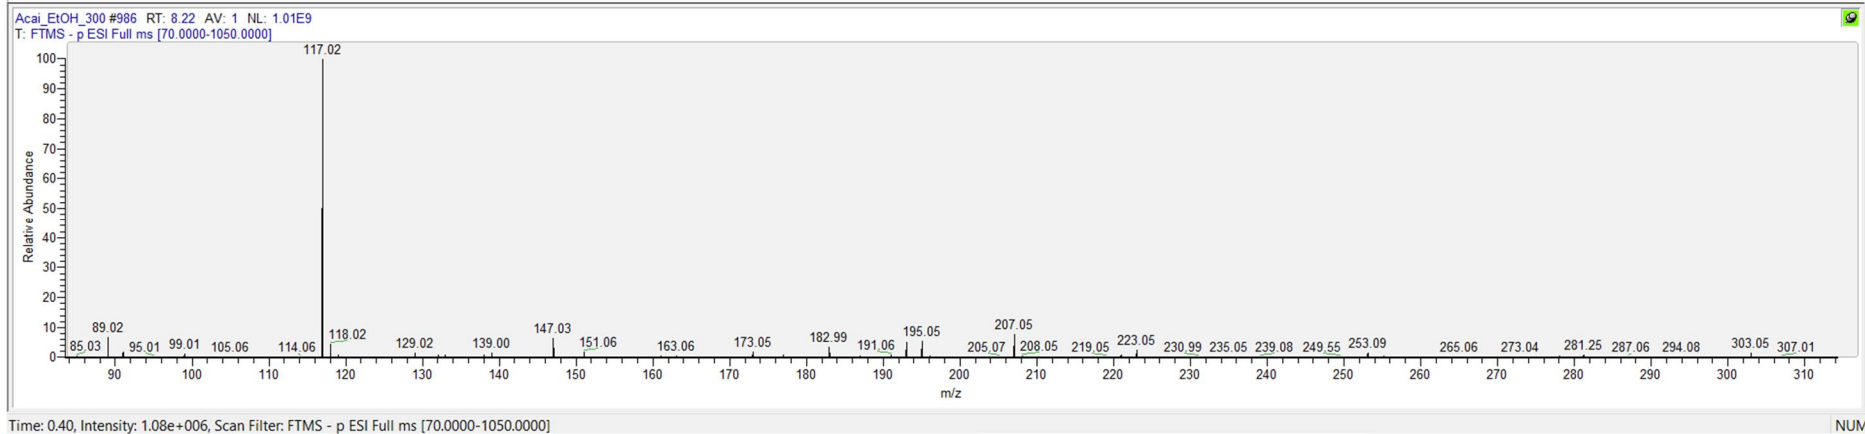



Quercetin-3-O-  
rutinoside (rutin)

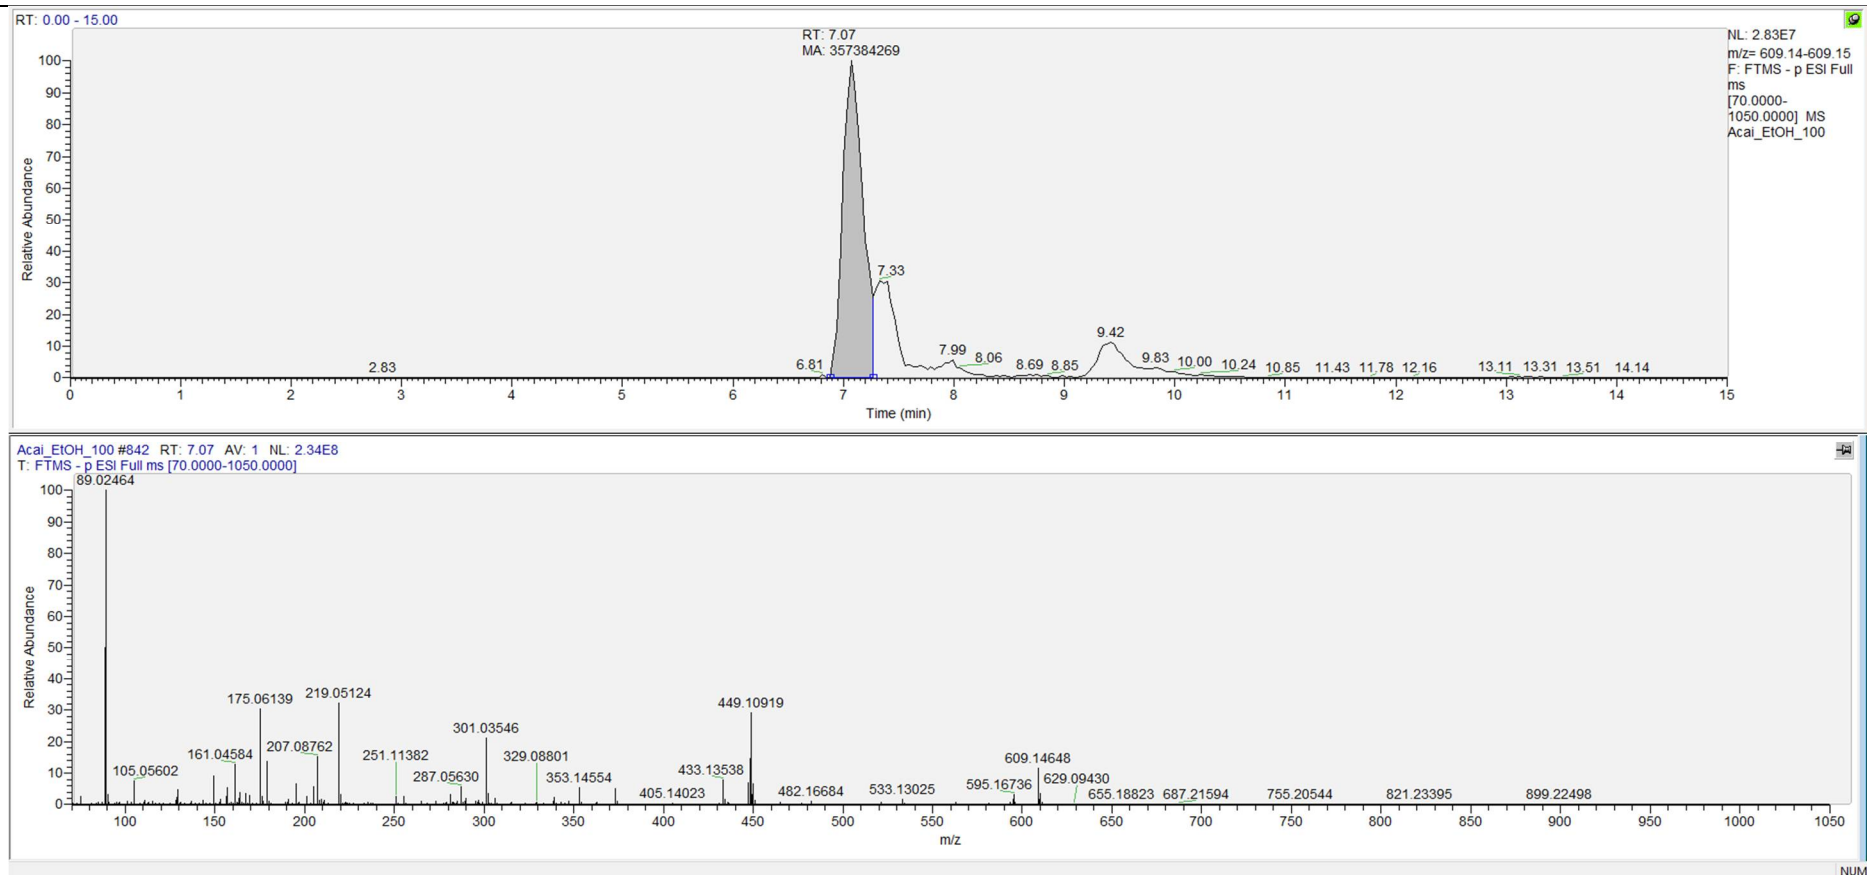

Quercetin 3-O-  
glucoside  
(Isoquercitrin)

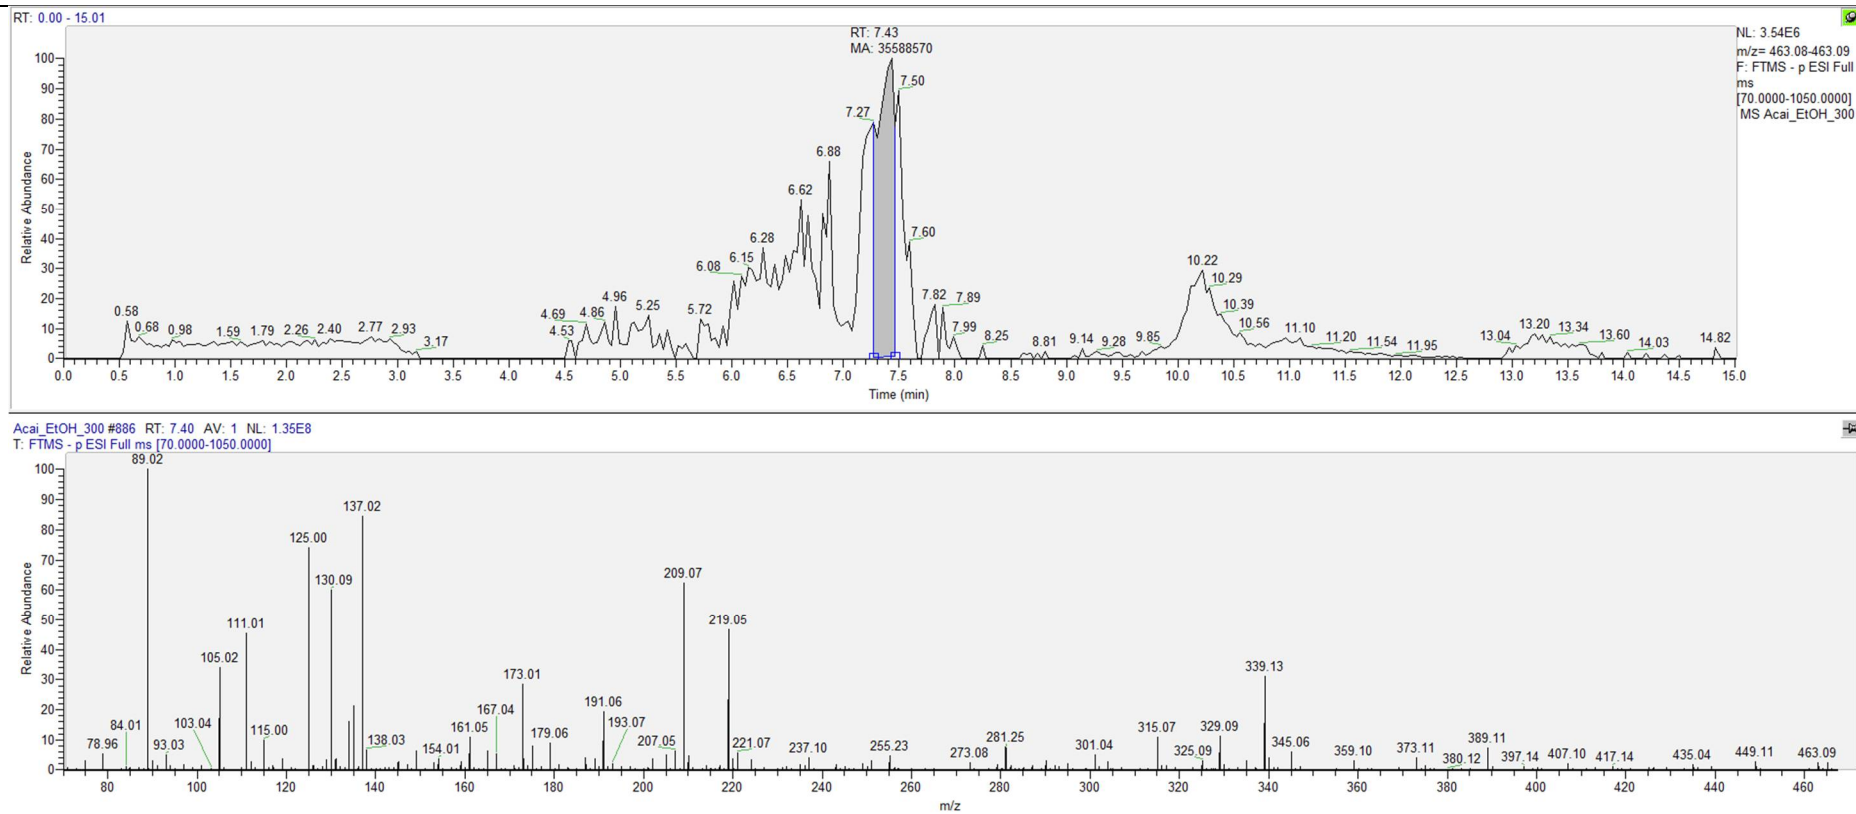

Kaempferol  
rhamnoside

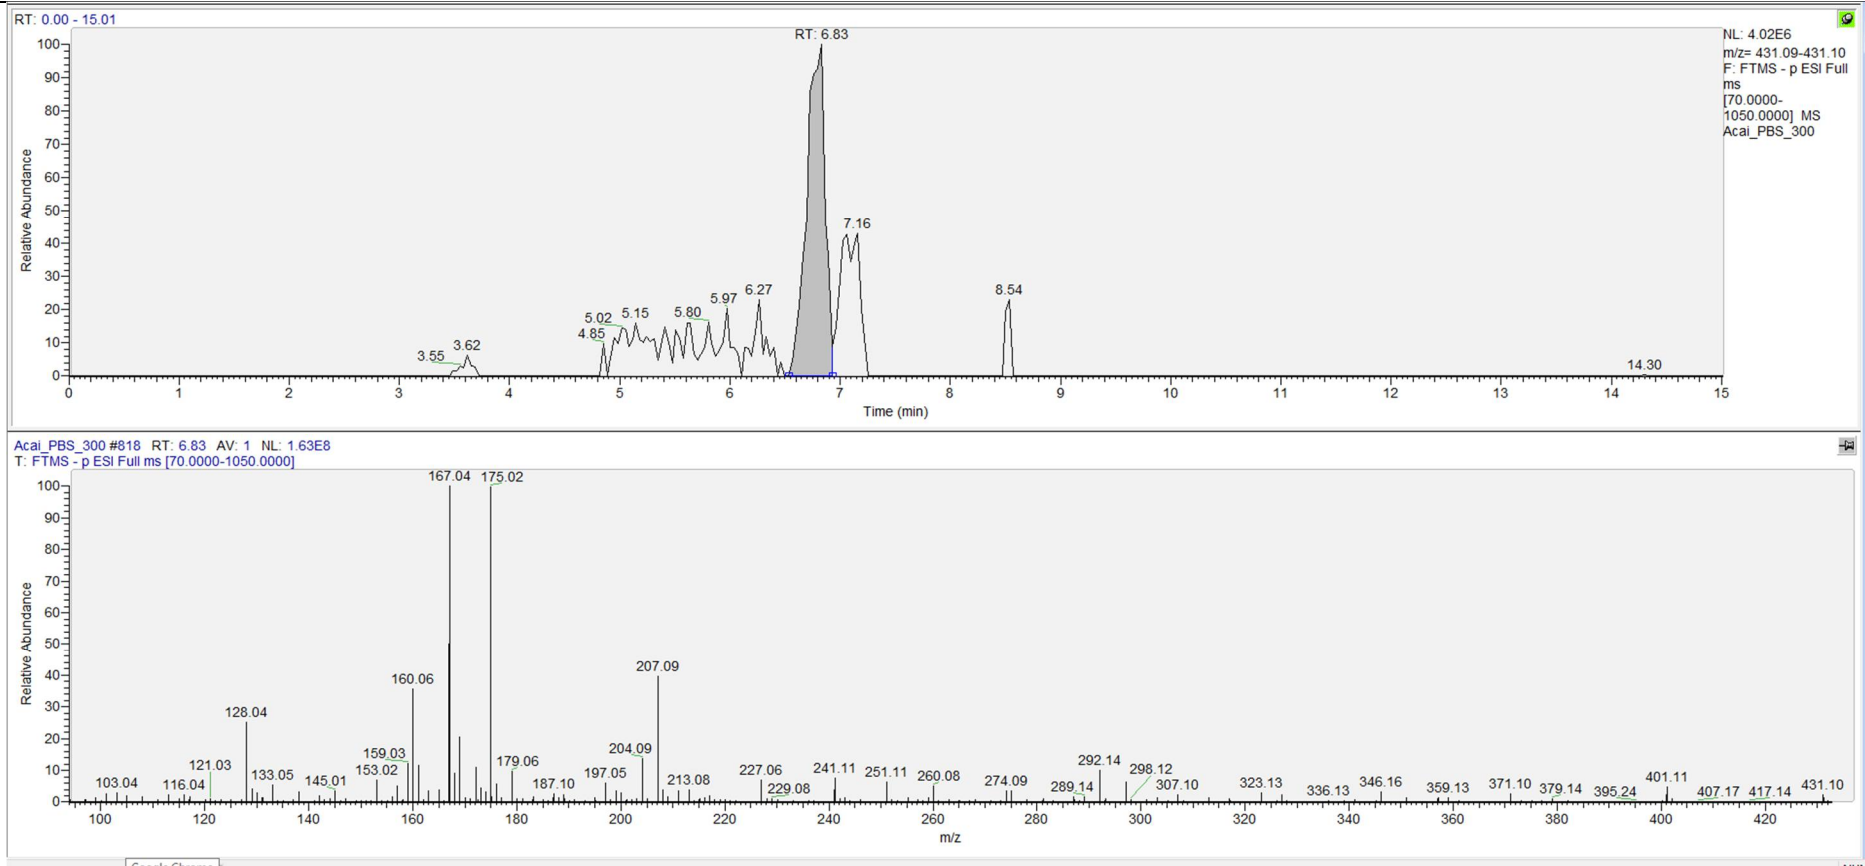

Isoorientin

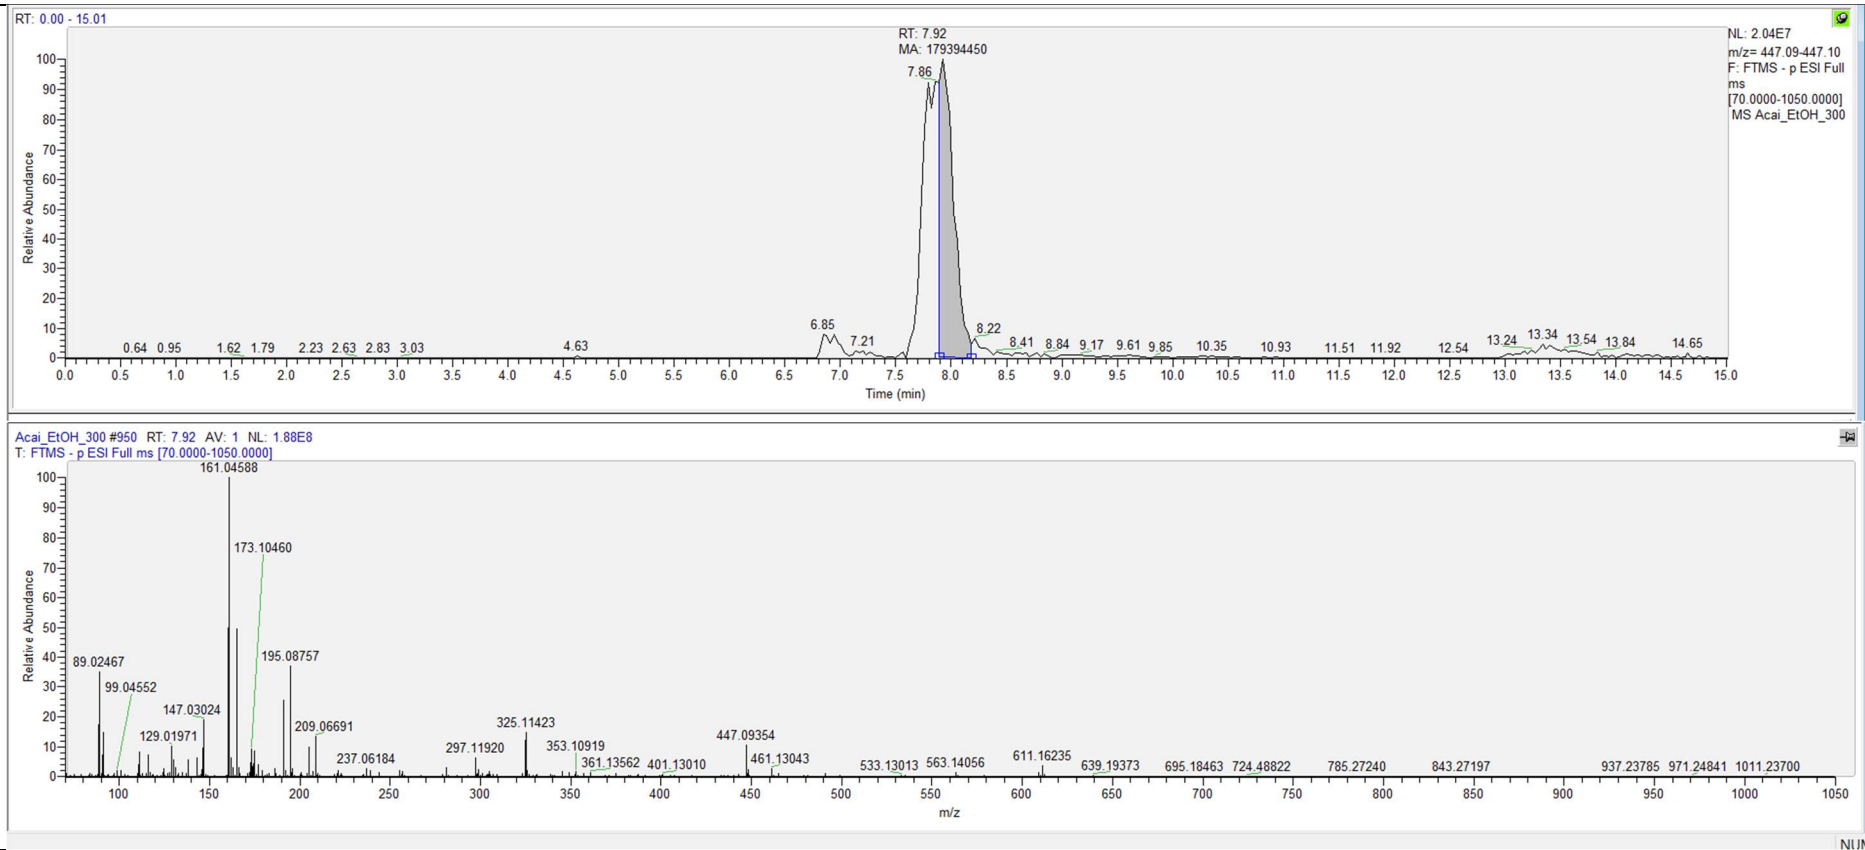

(+)-lariciresinol

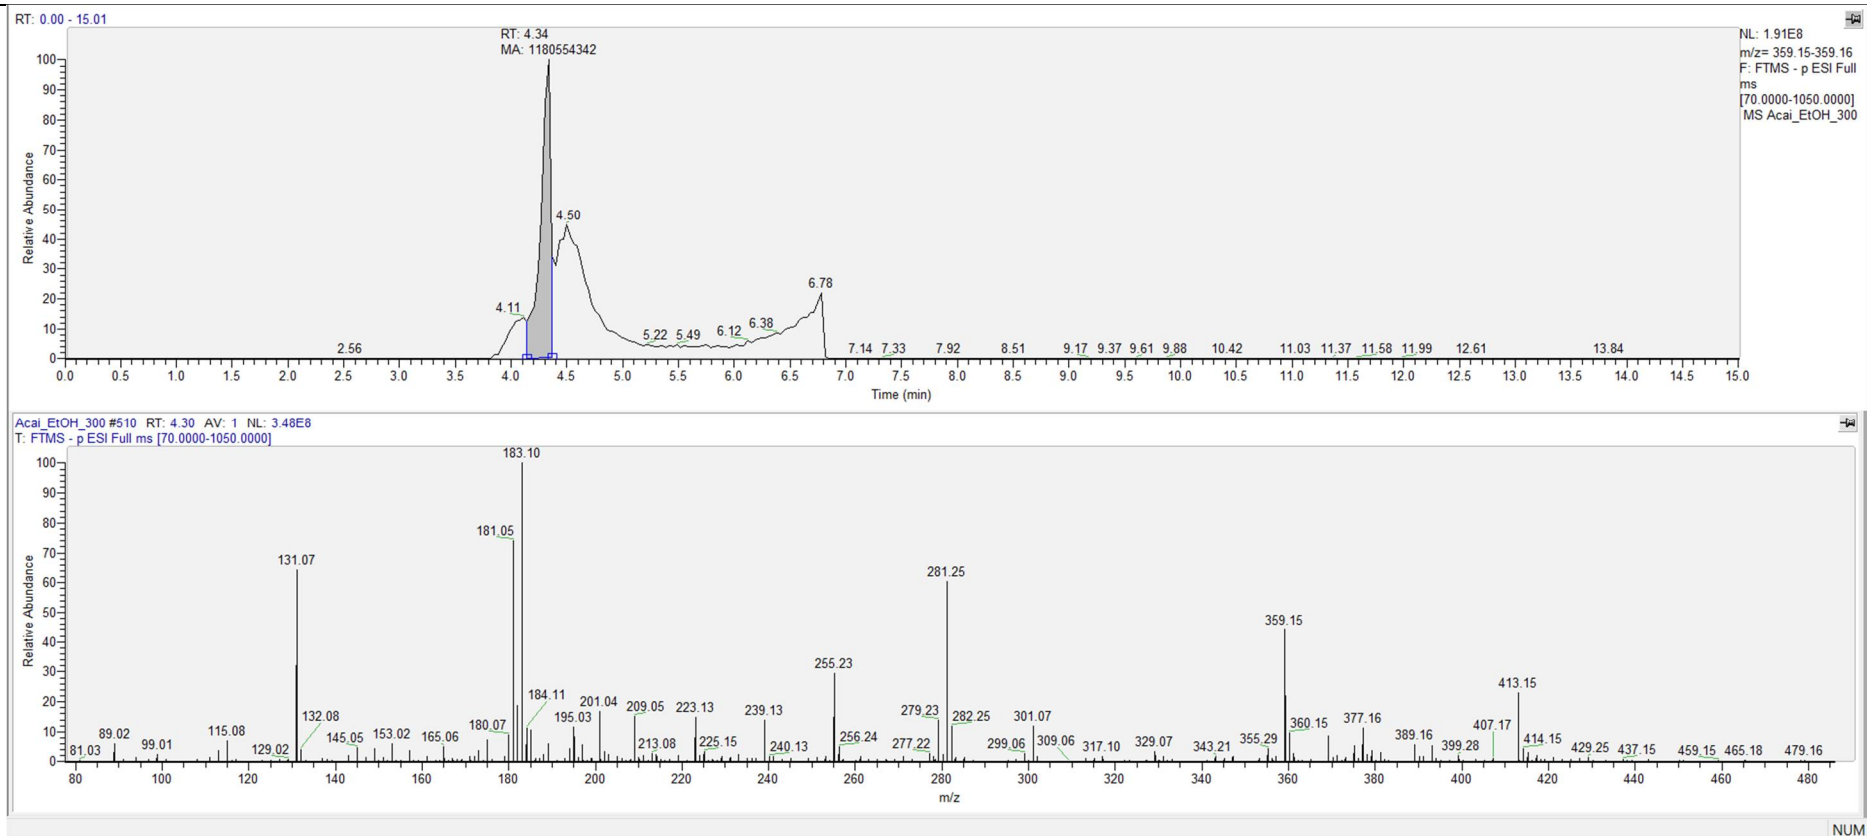

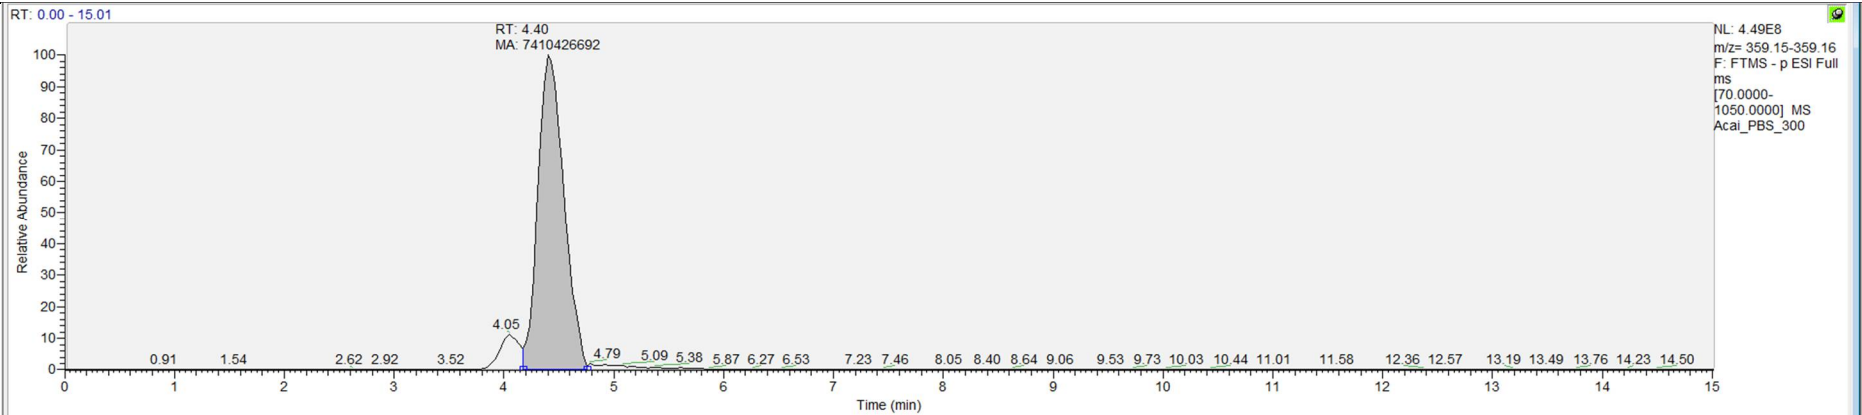

Acai\_PBS\_300 #522 RT: 4.40 AV: 1 NL: 7.56E8  
T: FTMS - p ESI Full ms [70.0000-1050.0000]

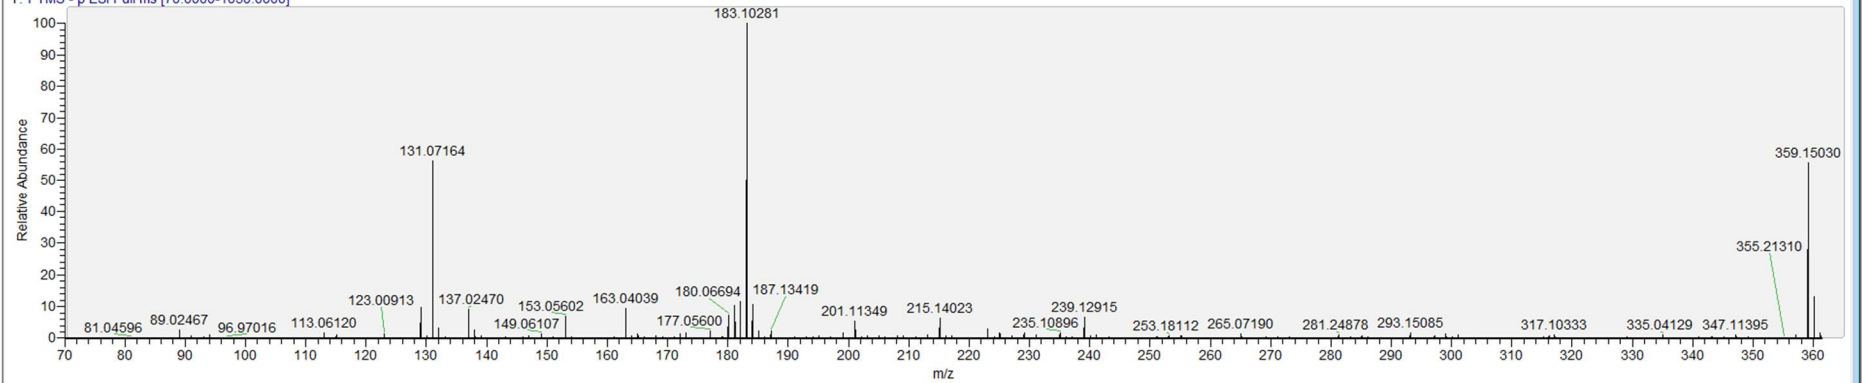

NUM

Dihydroconiferyl  
alcohol

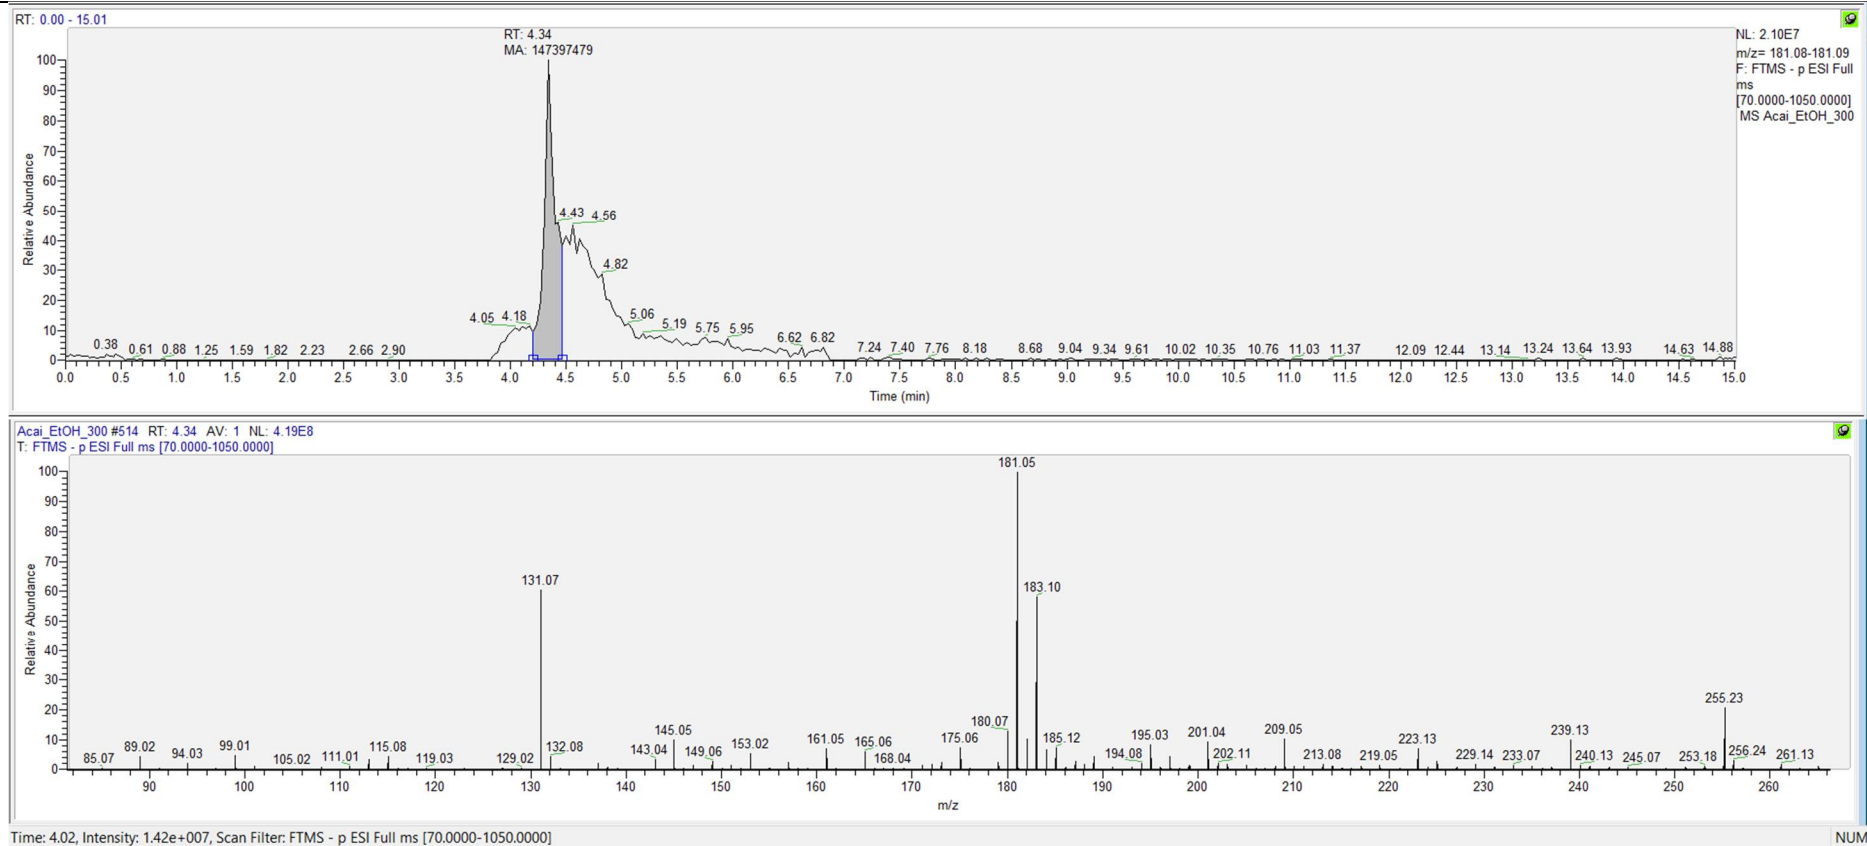

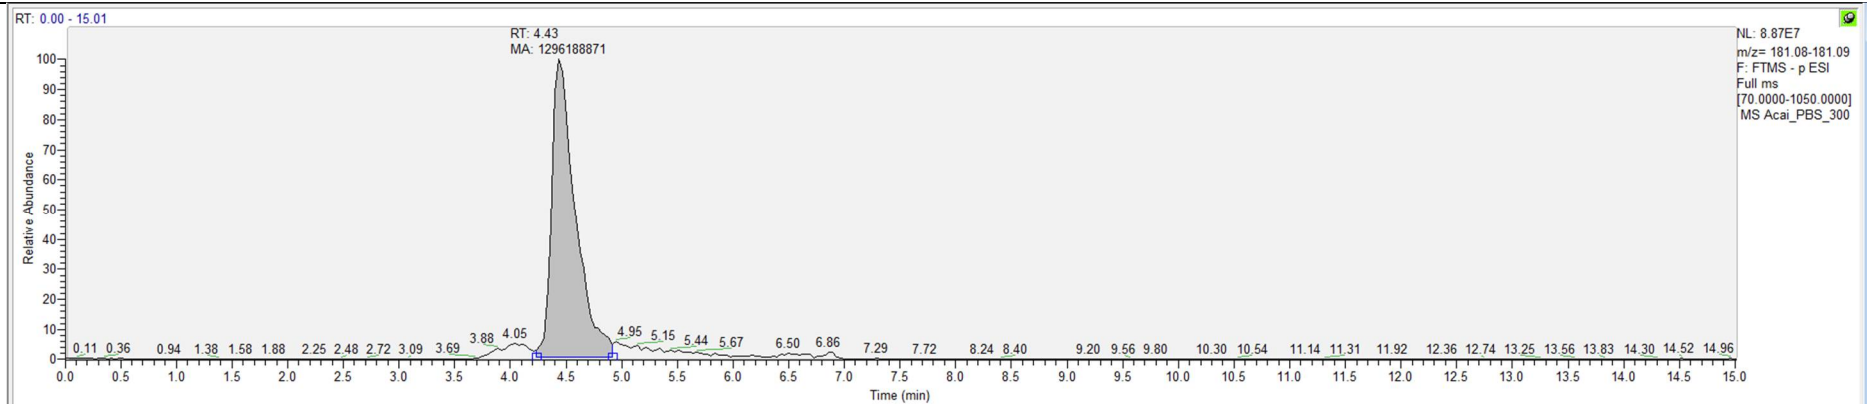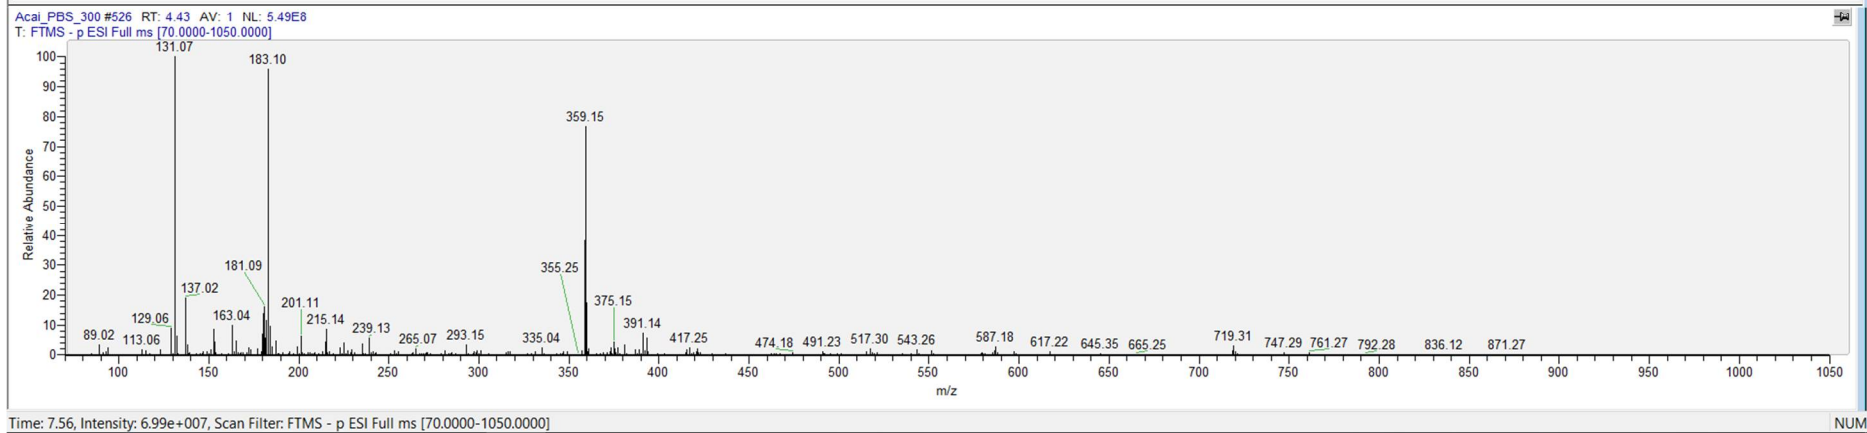



(+)-Catechin

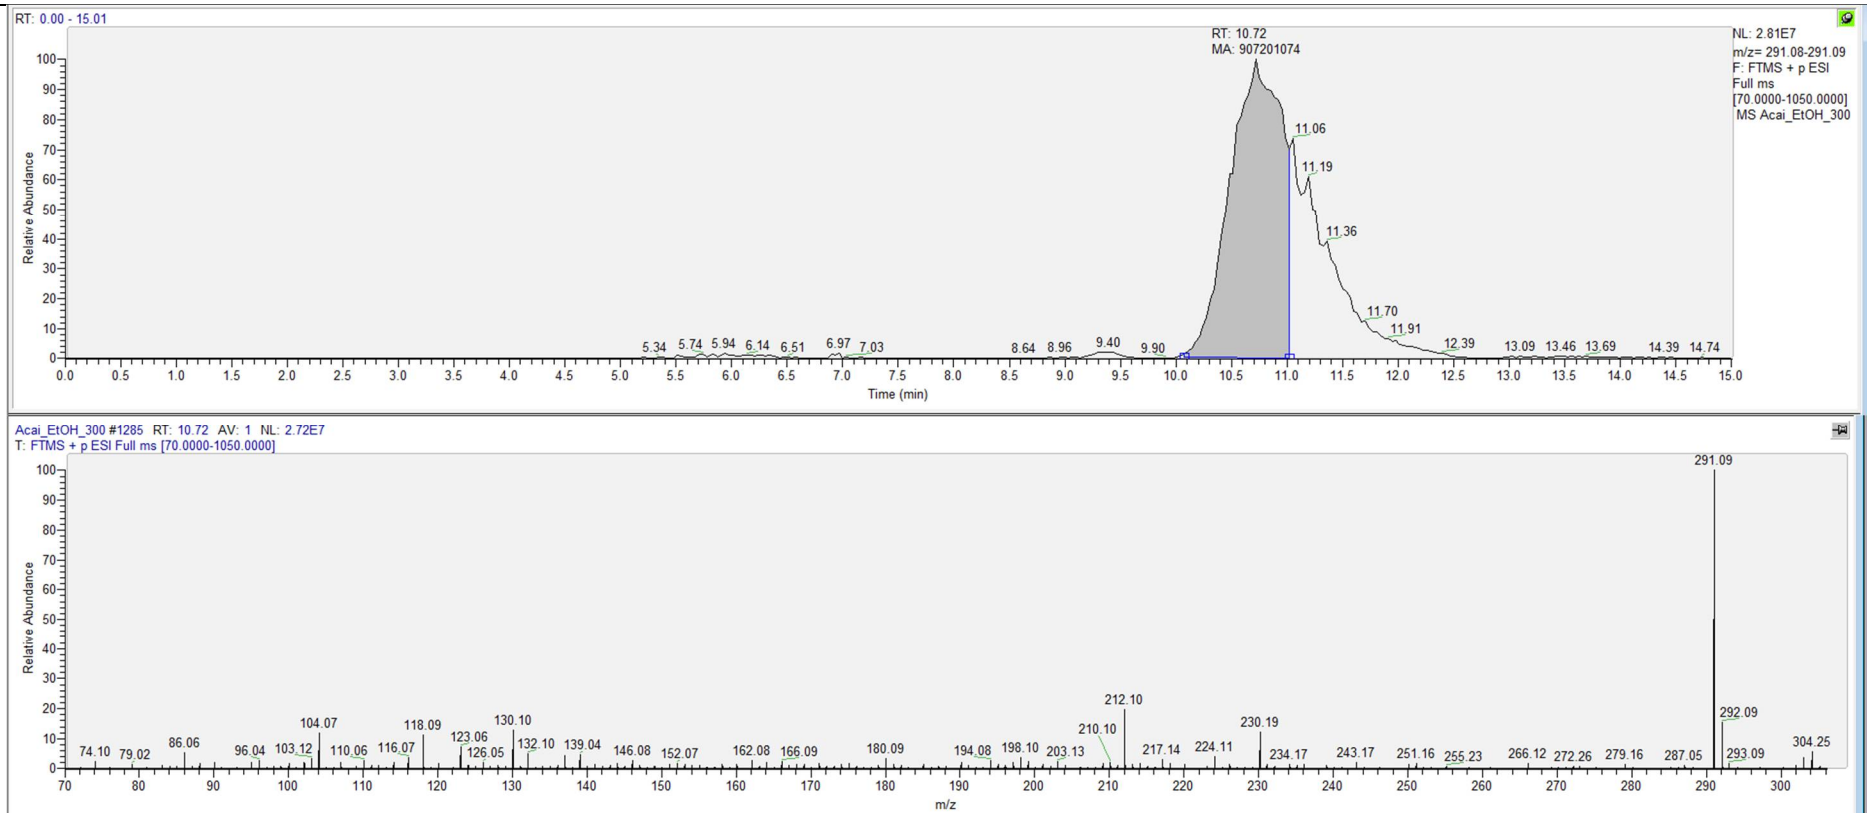

CAP NUM

(+)-menthiafolic  
acid

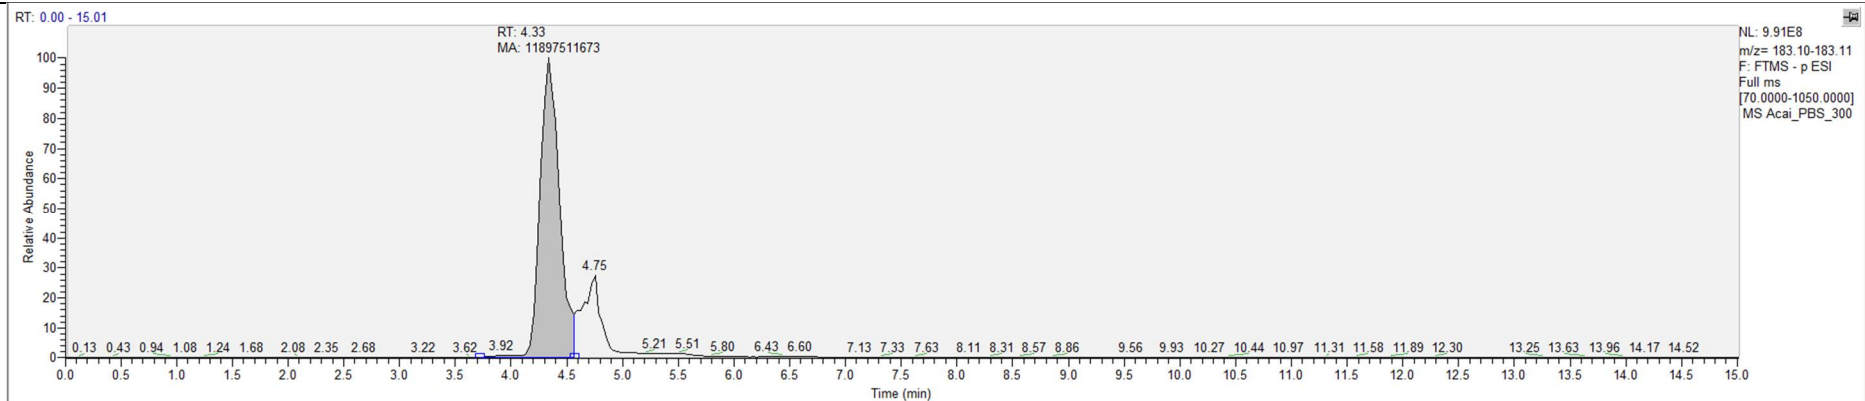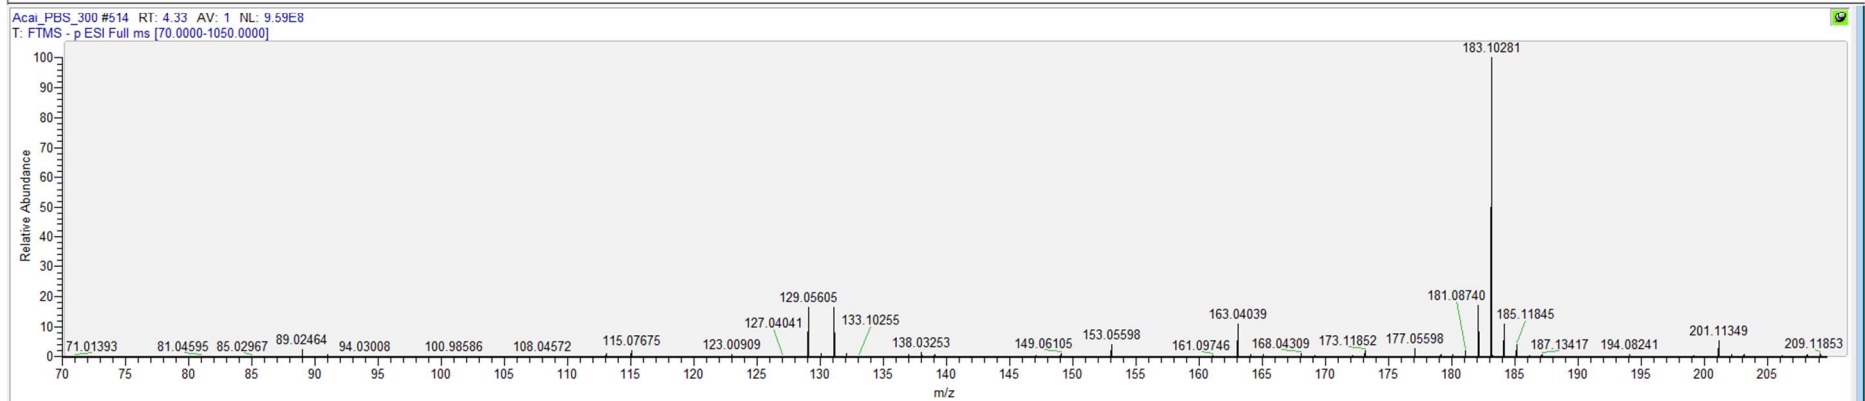

CAP NUM

(E,Z)-2,6-dimethyl-  
2,6-octadiene-1,8-  
diol

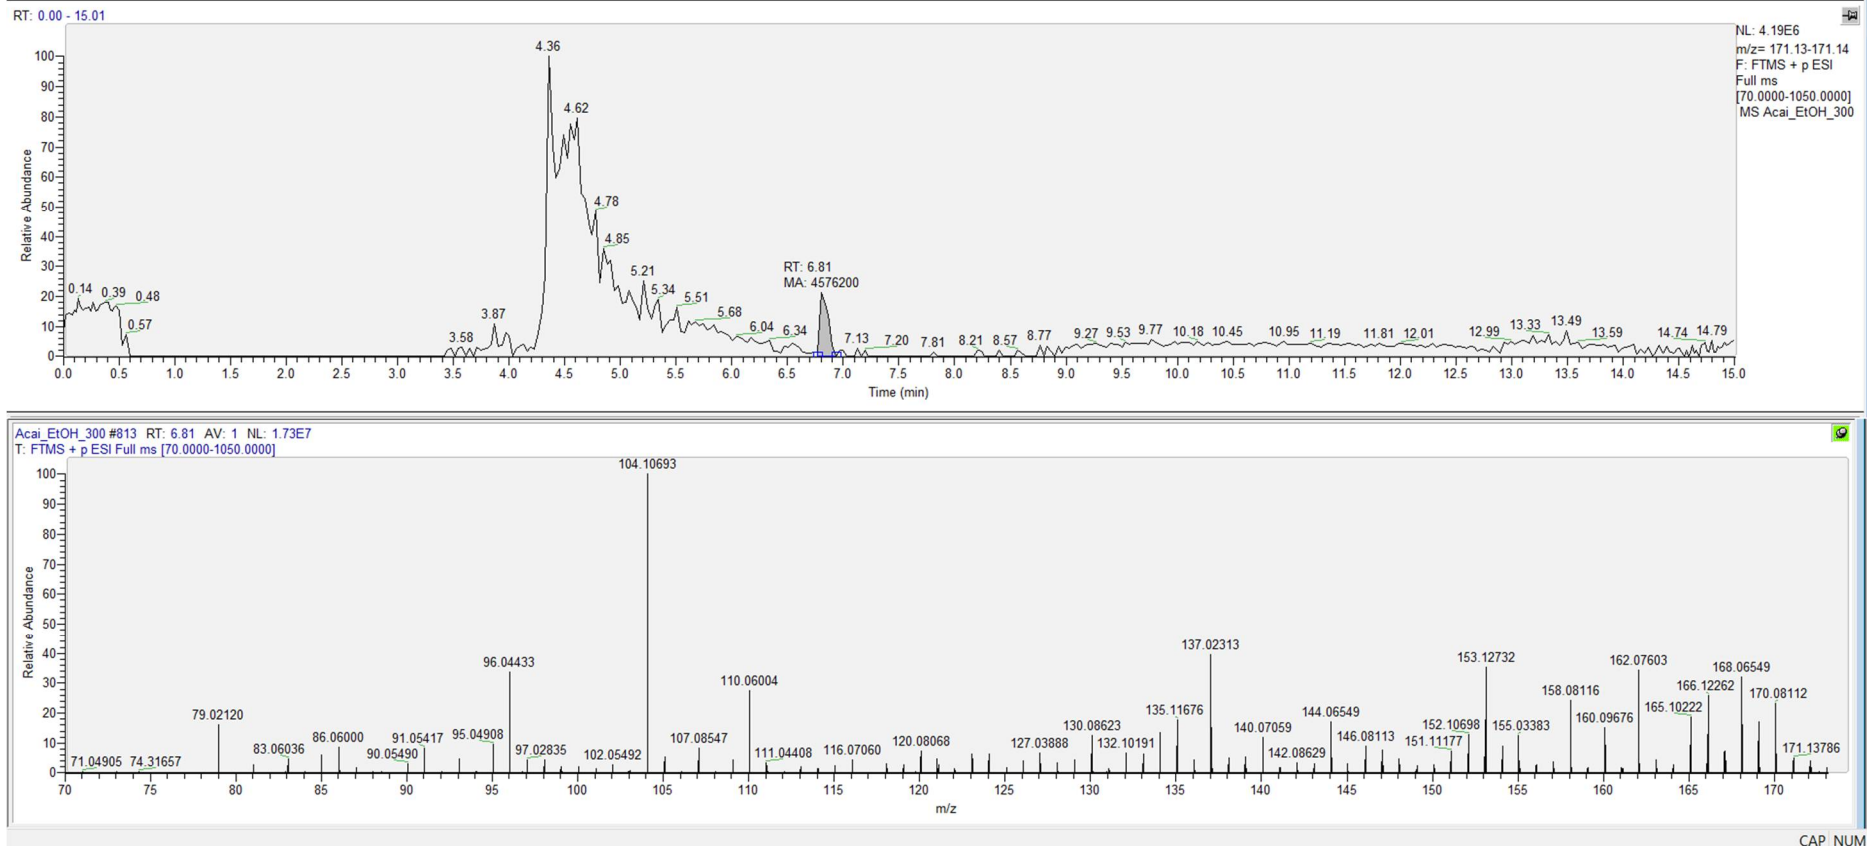

(-)-loliolide

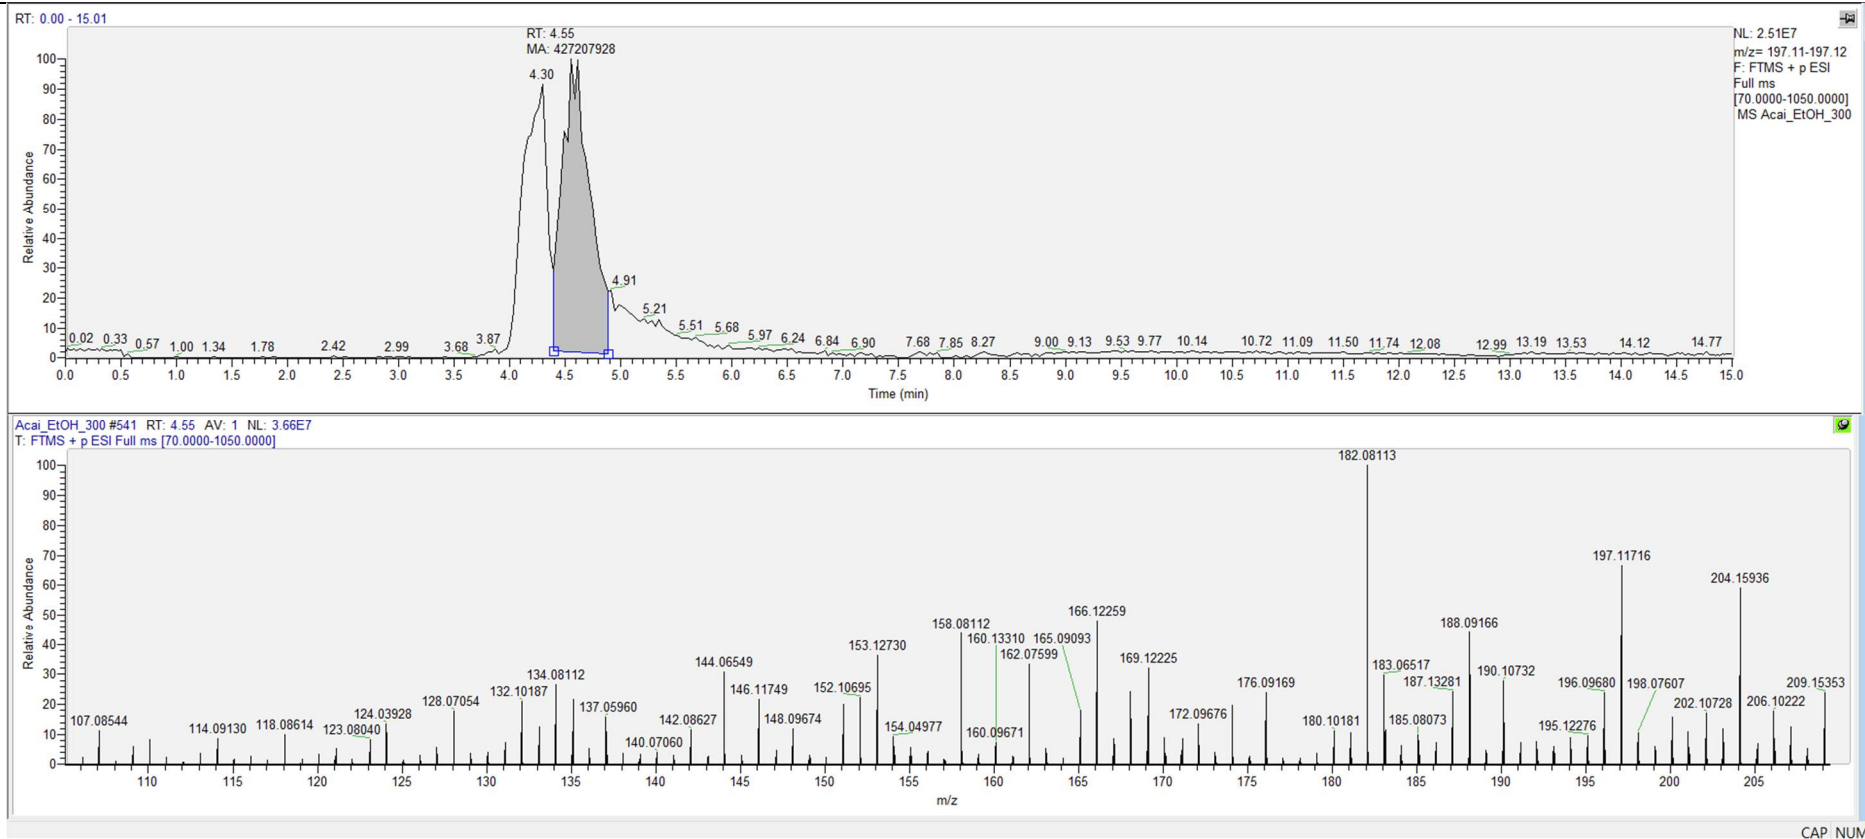

Oleic acid

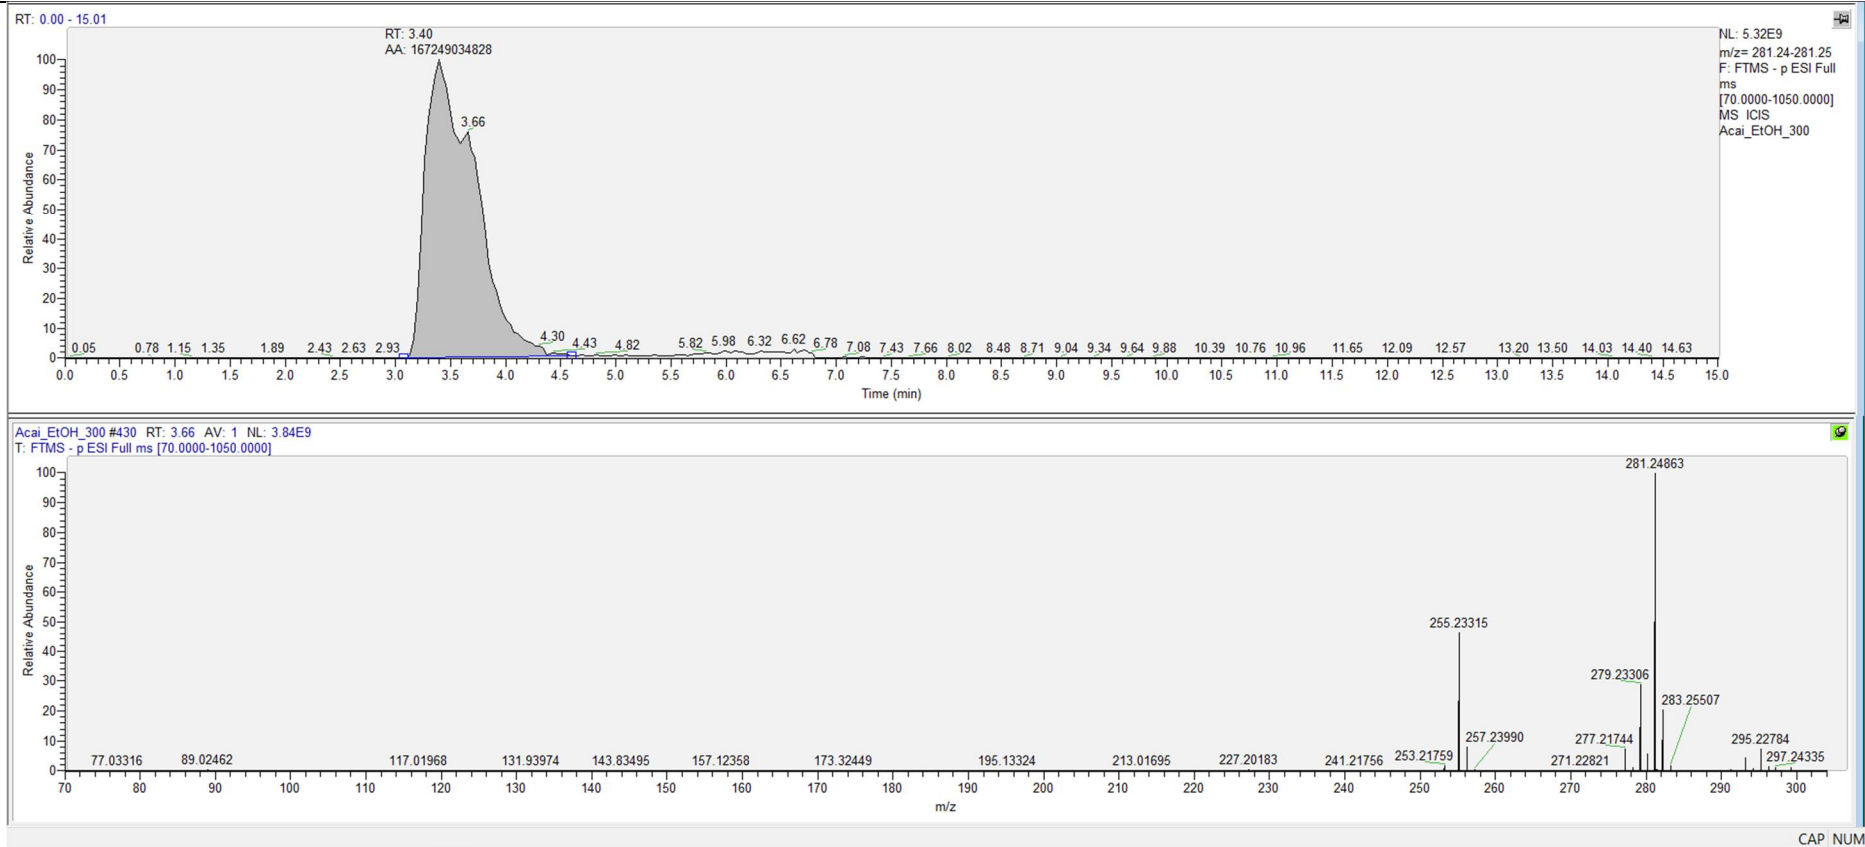

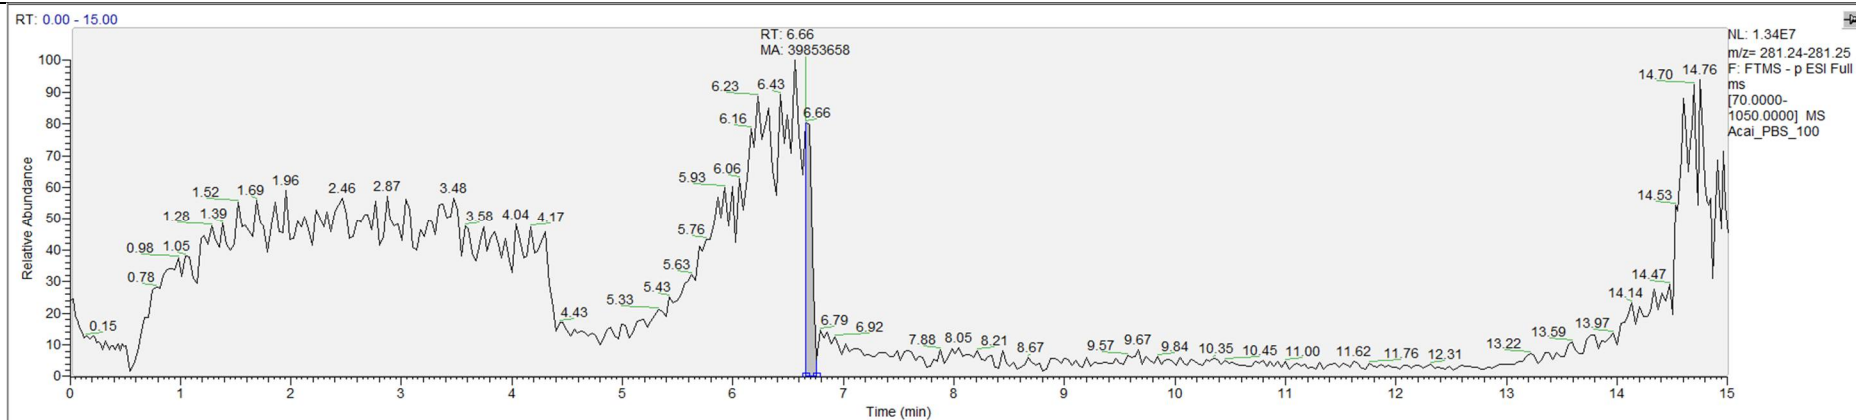

Acal\_PBS\_100 #790 RT: 6.66 AV: 1 NL: 1.02E7  
T: FTMS - p ESI Full ms [70.0000-1050.0000]

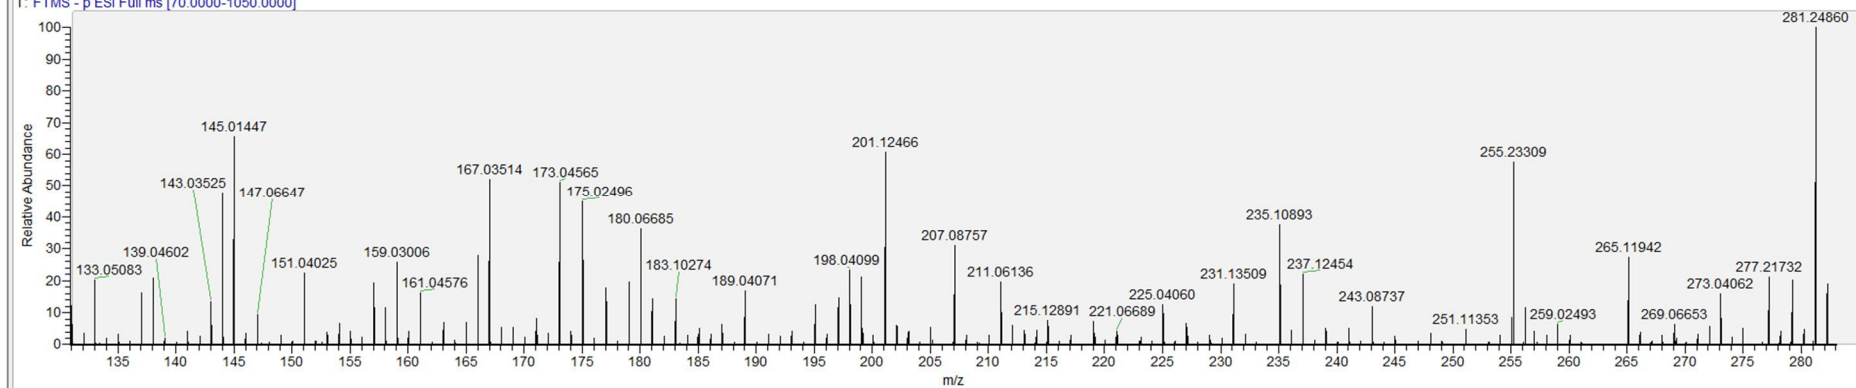

Palmitoleic acid

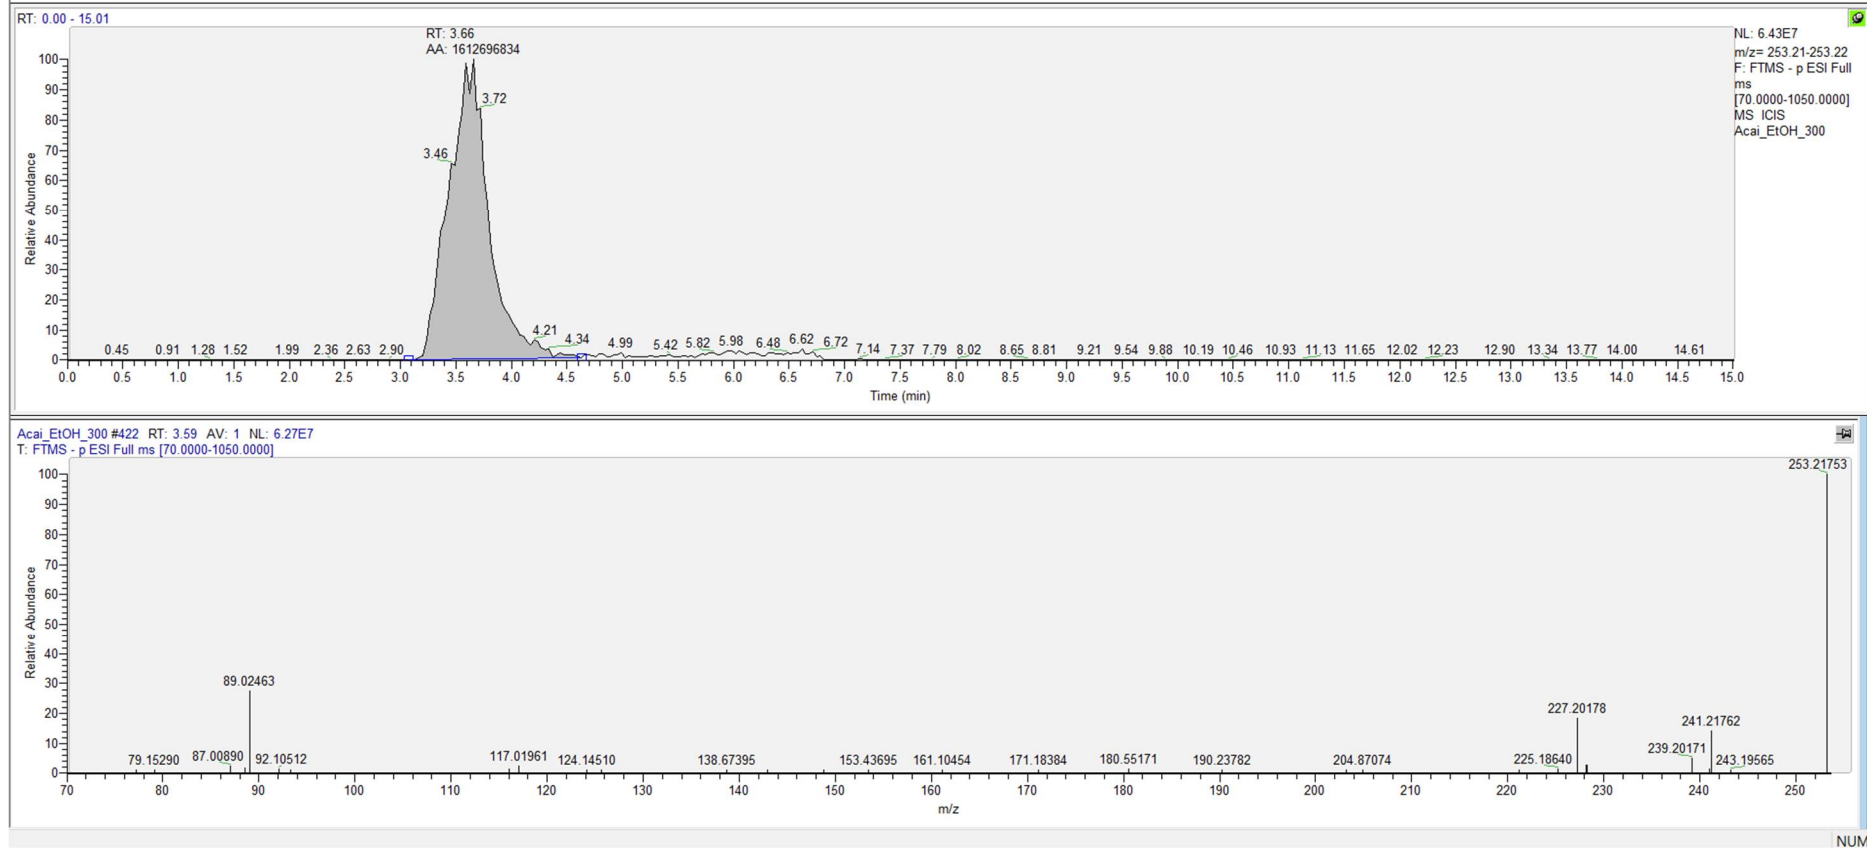

Linoleic acid

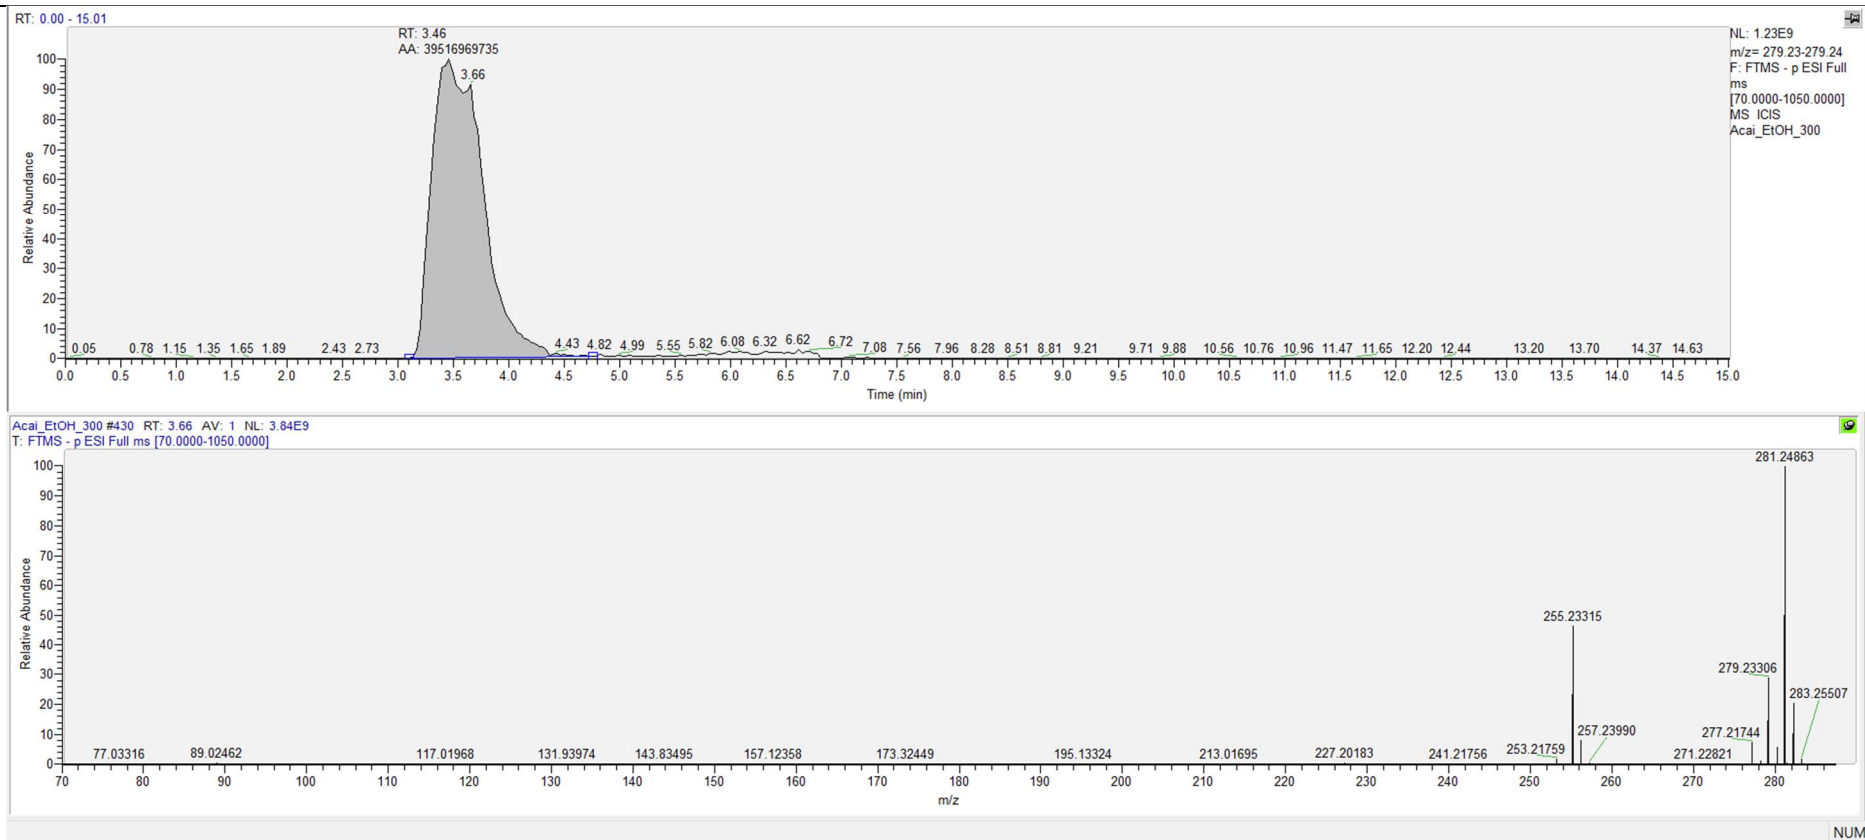



Linolenic acid

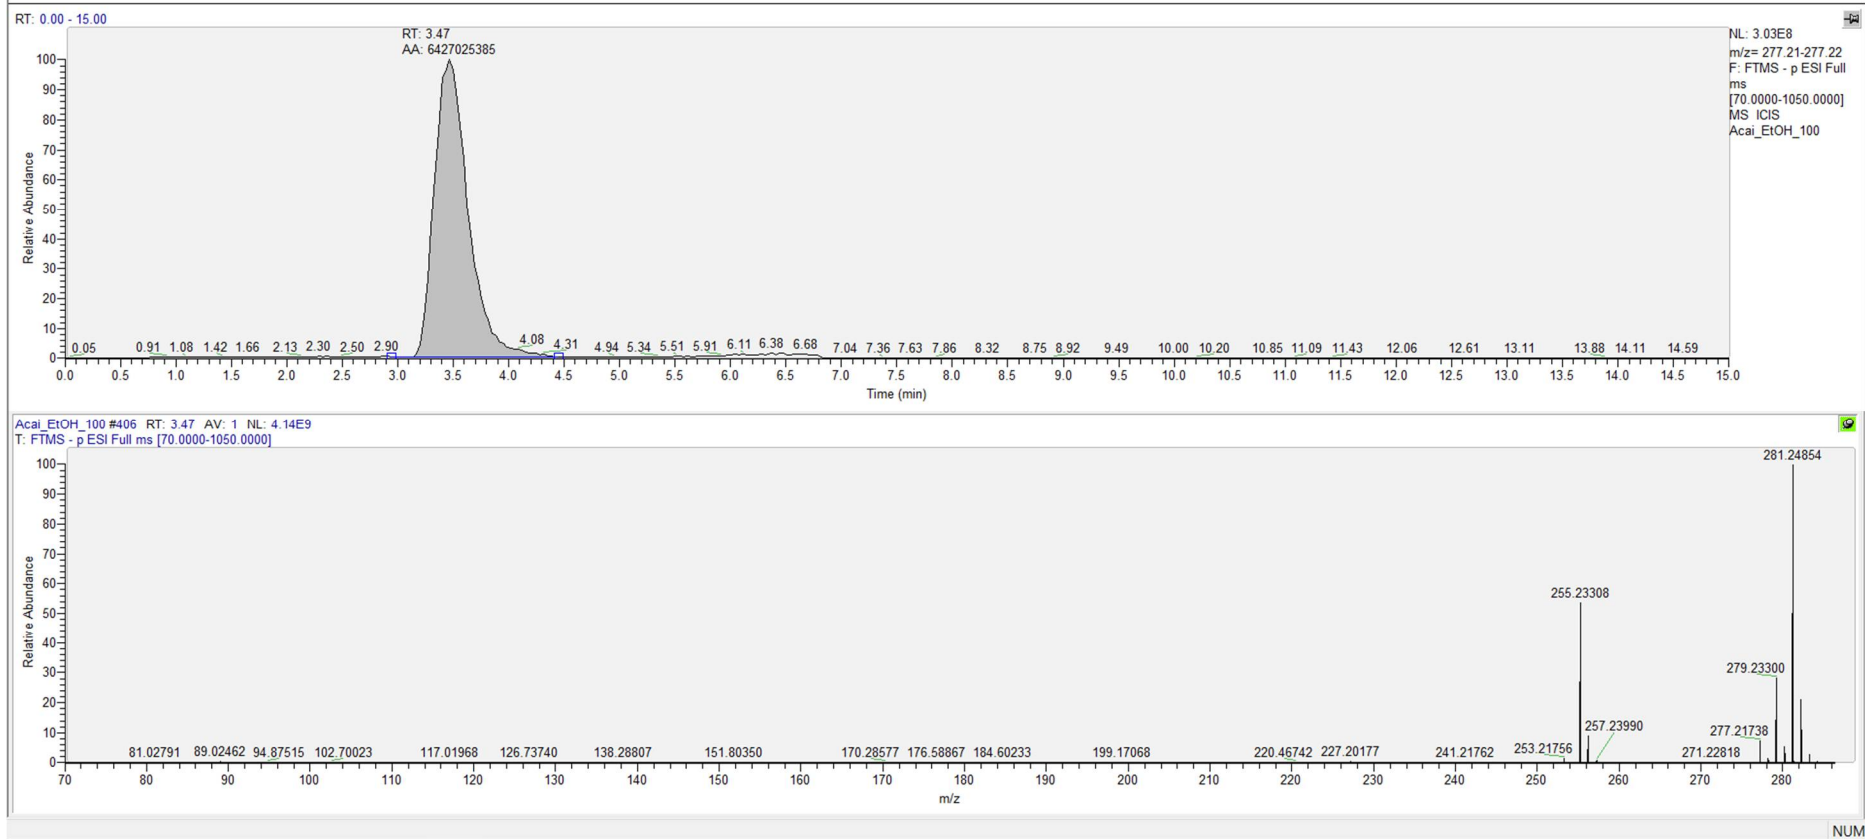

Palmitic acid

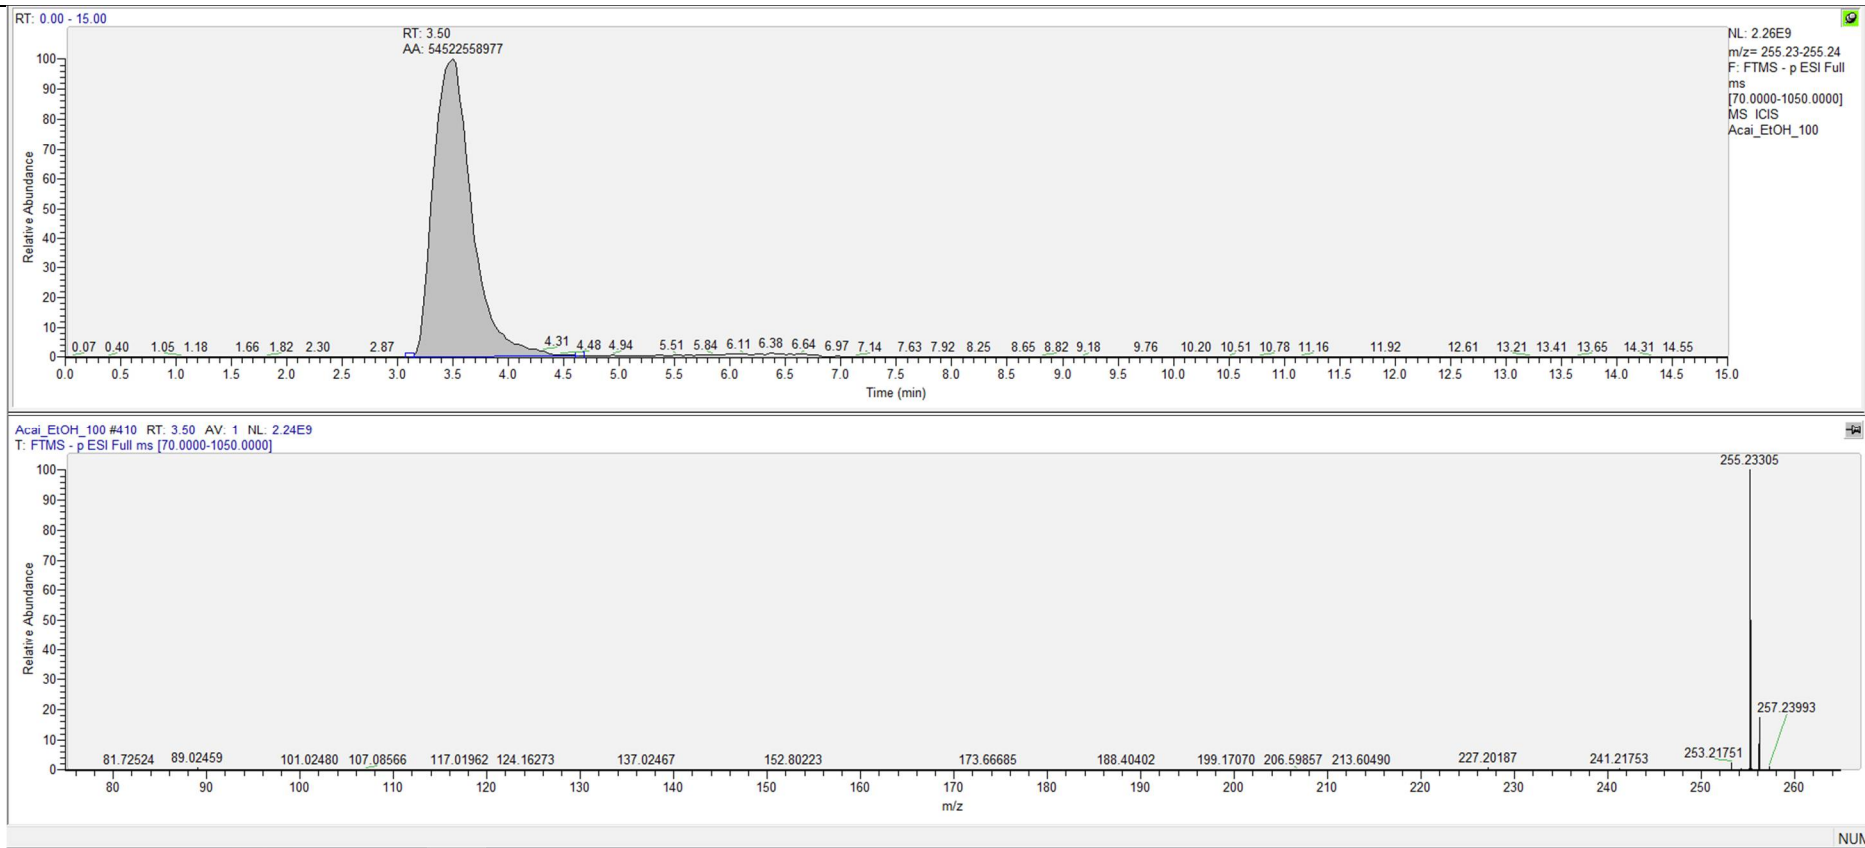

Stearic acid

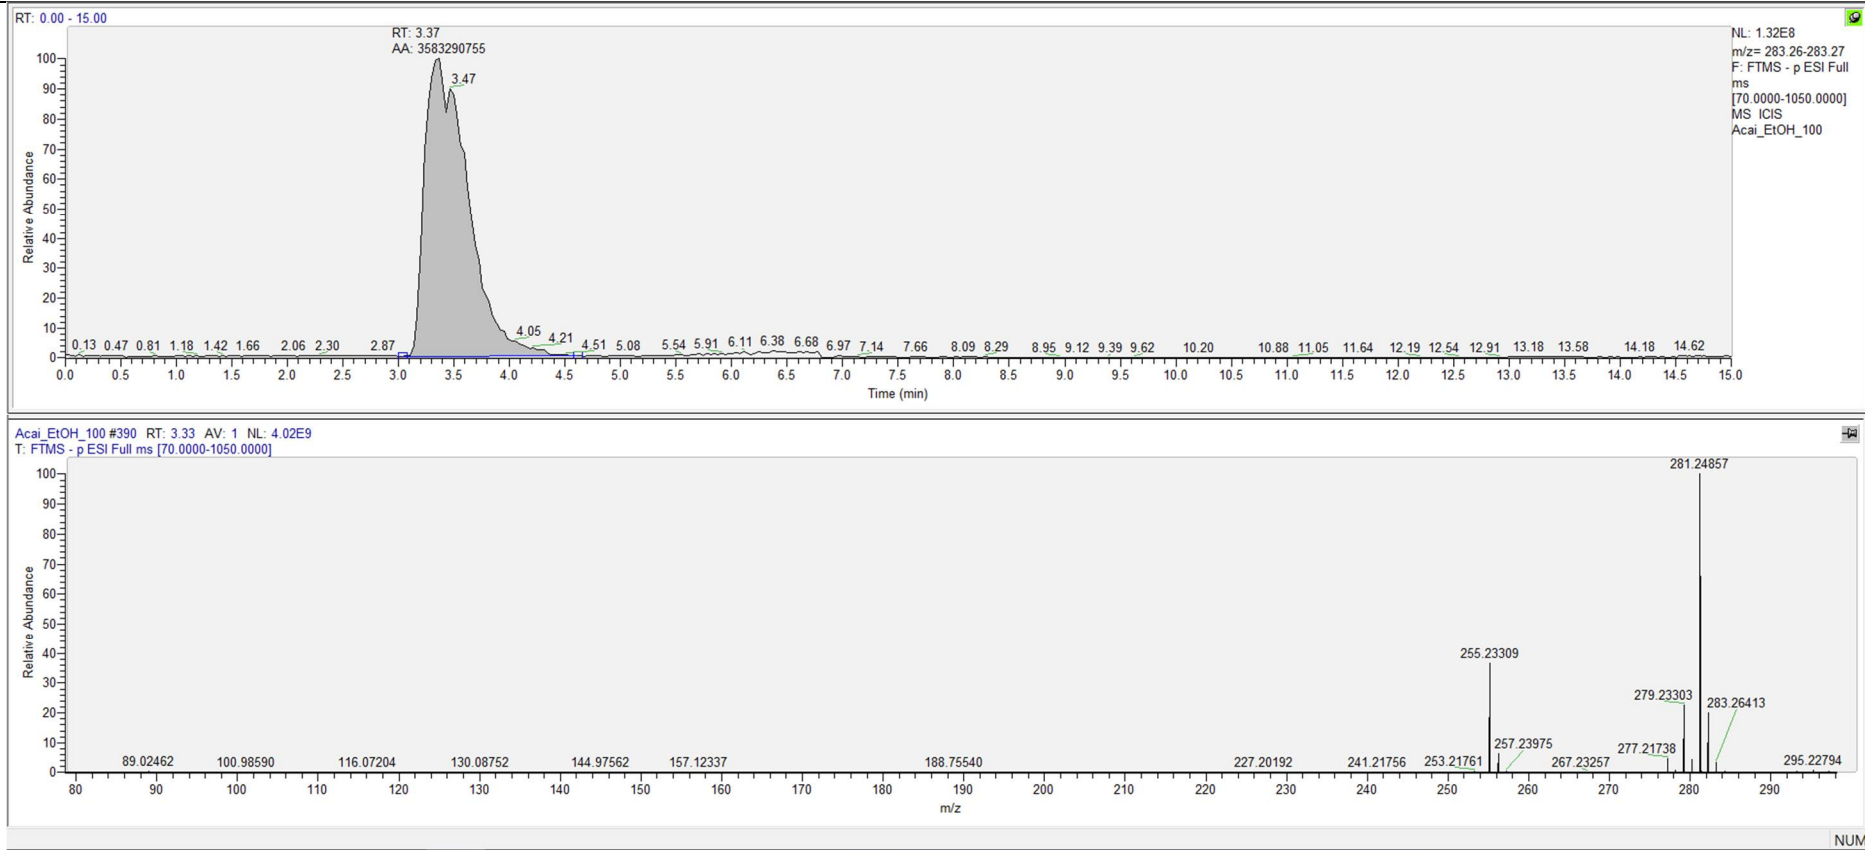

Alanine

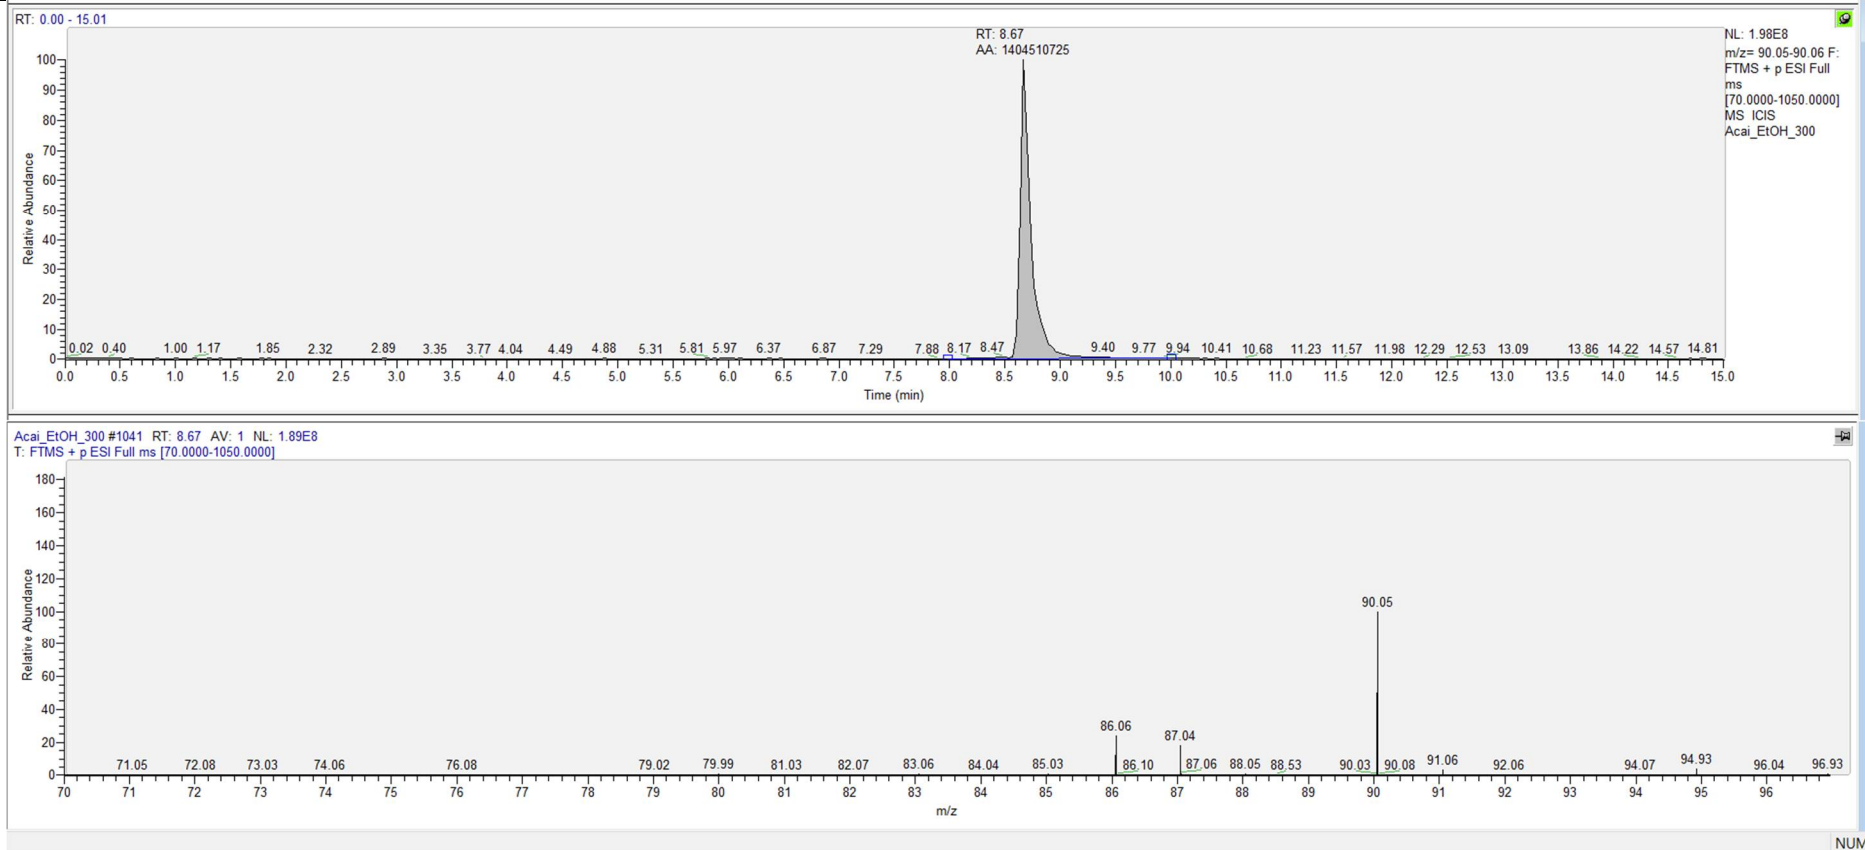

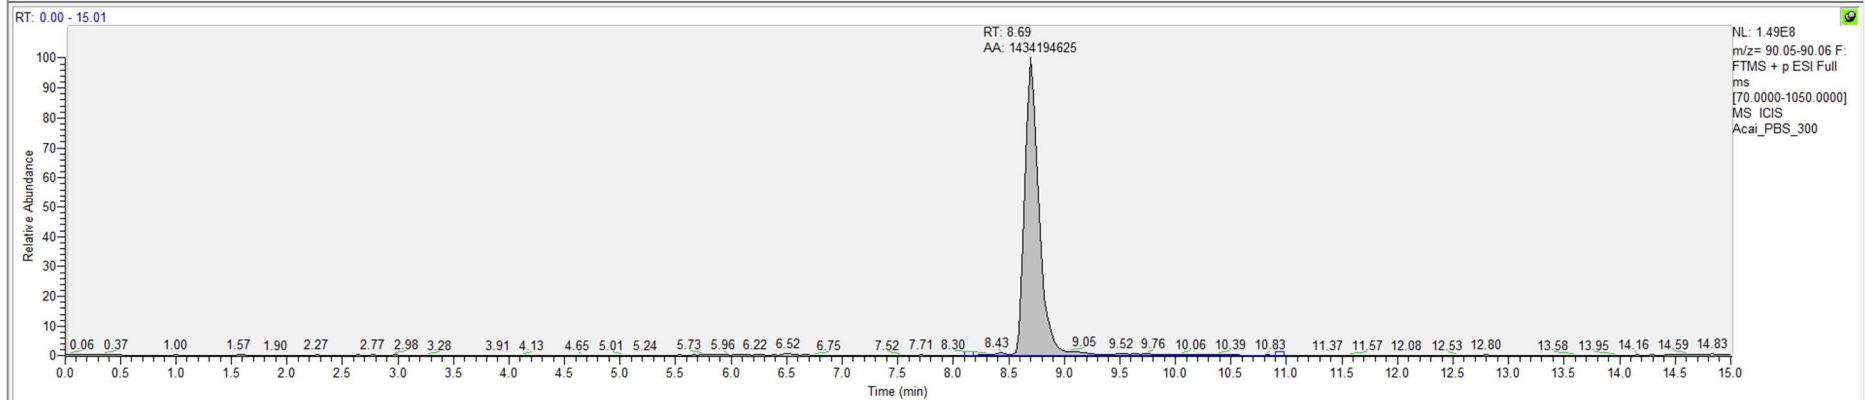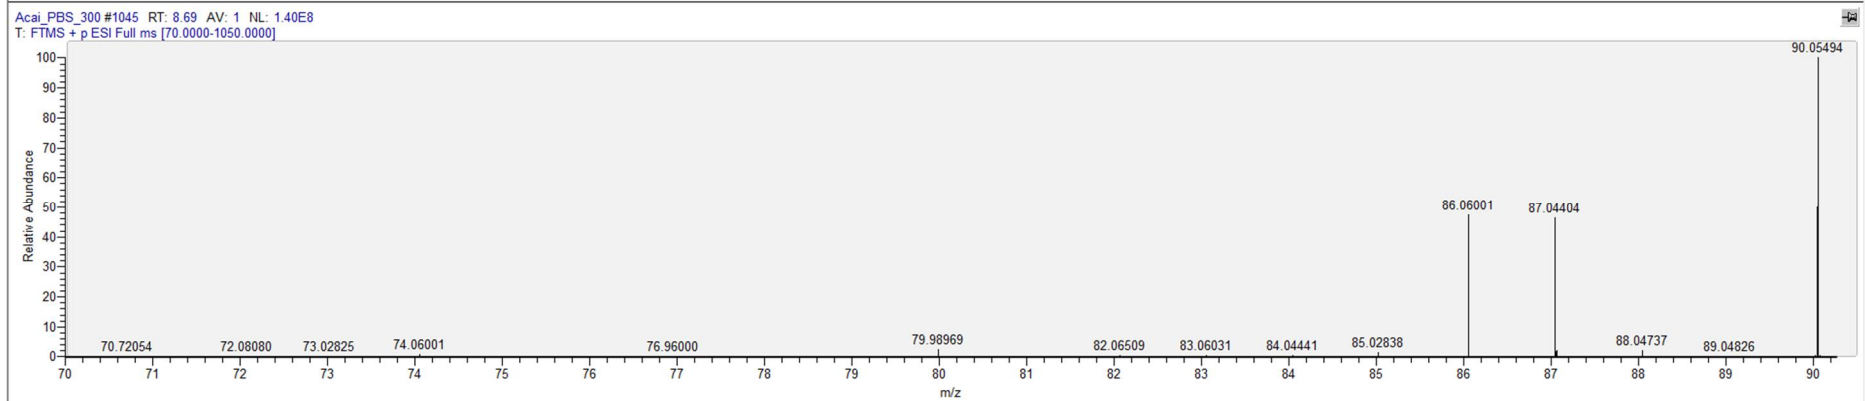

Lysine

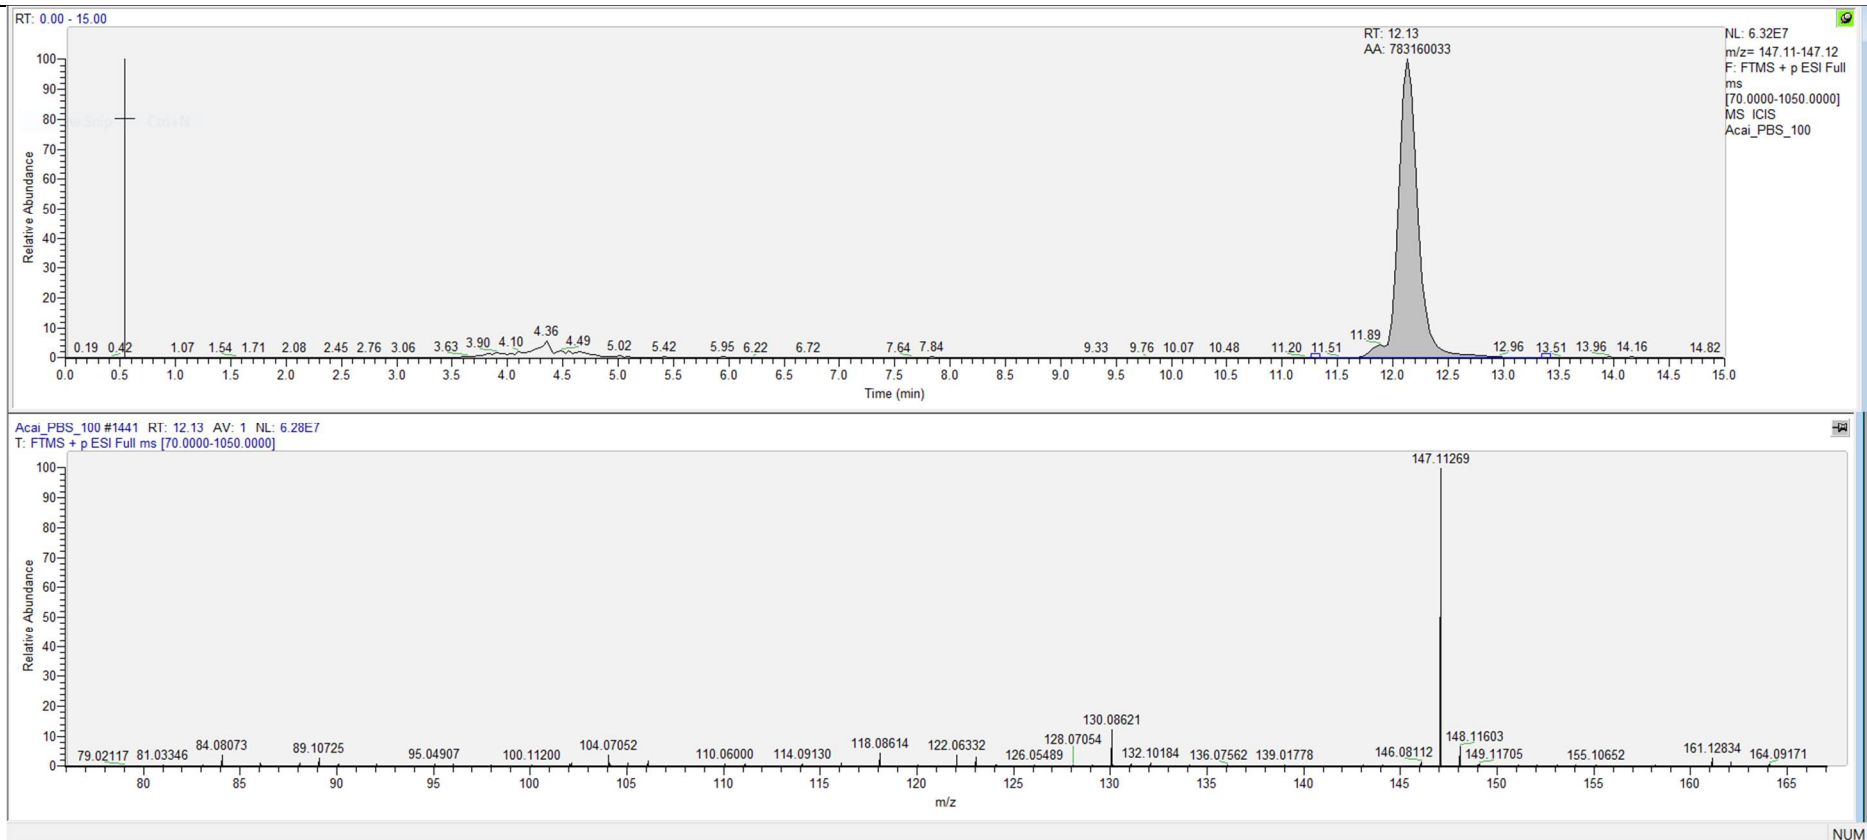

NUM

Arginine

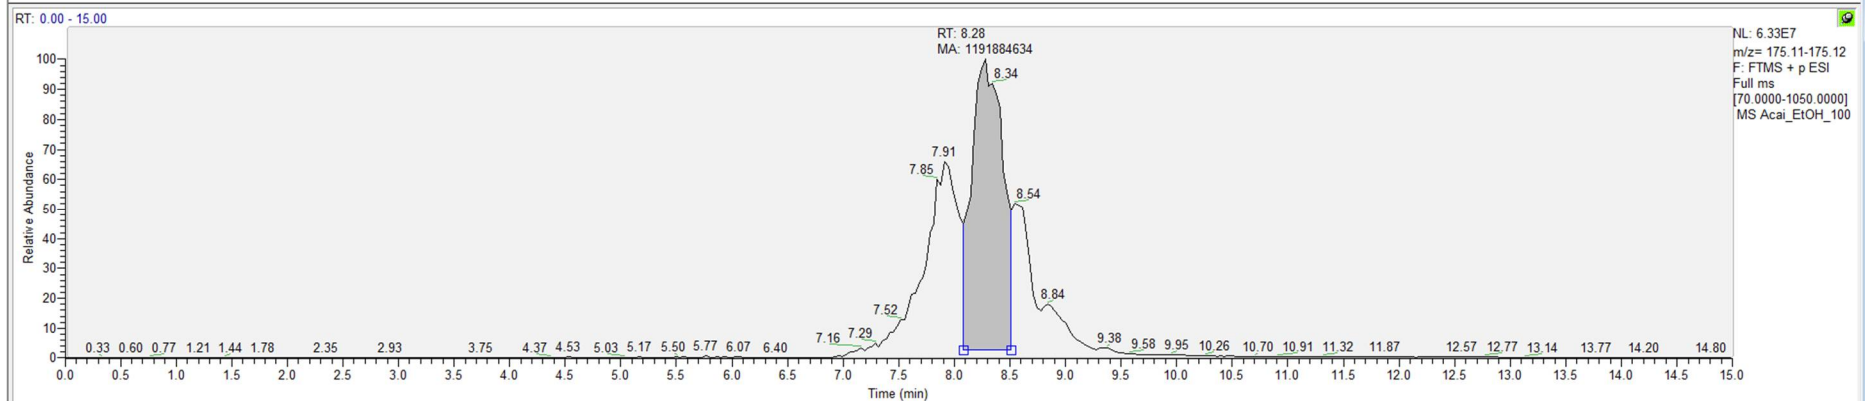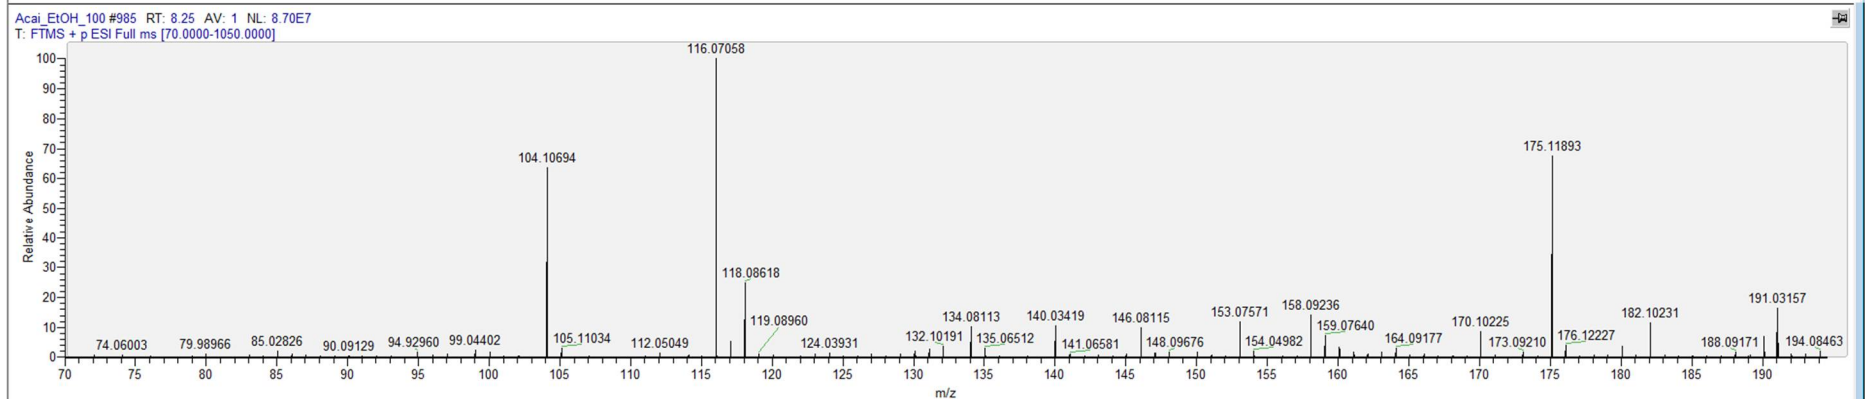

NUM

Methionine

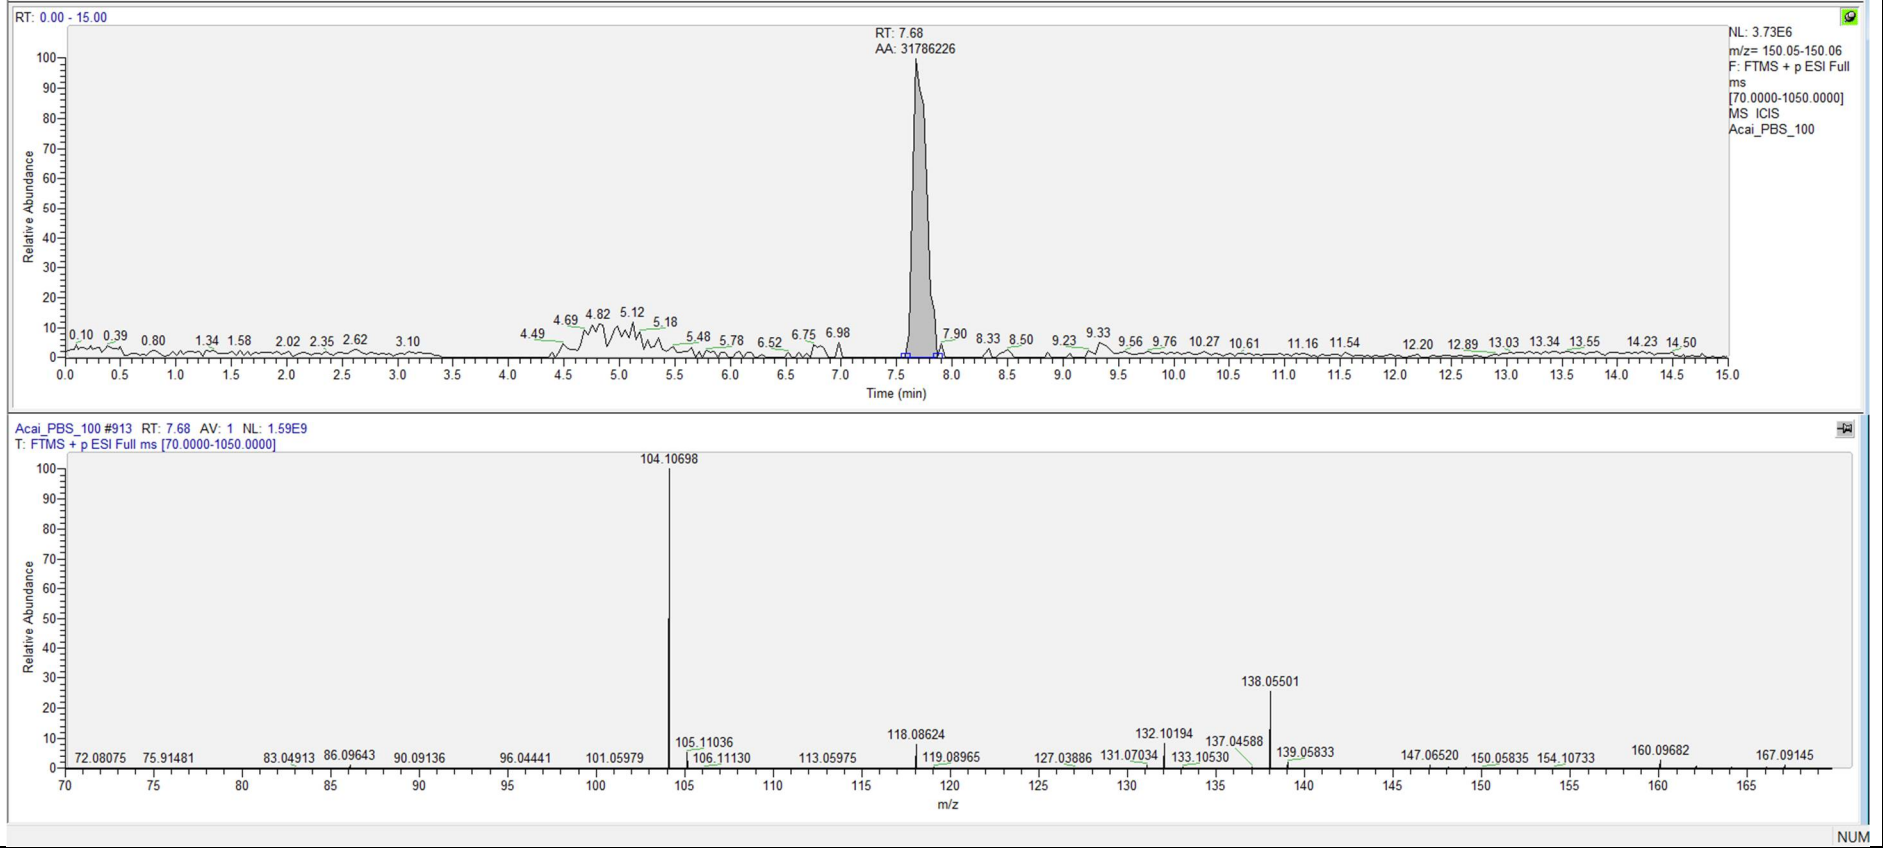



Phenylalanine

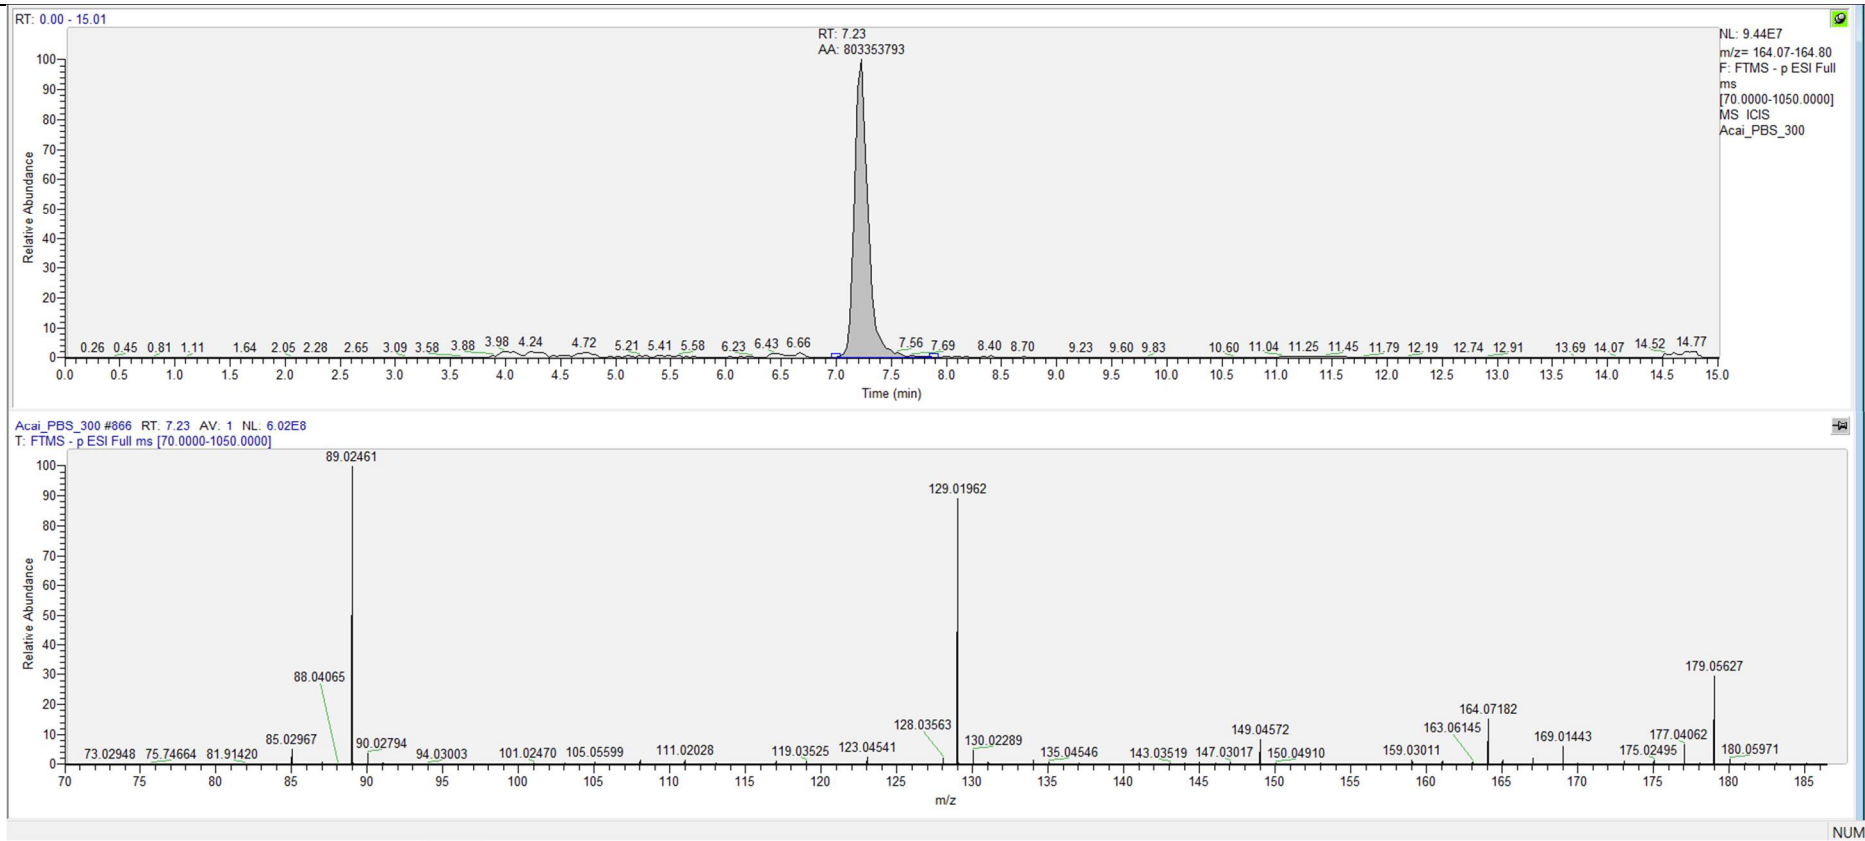

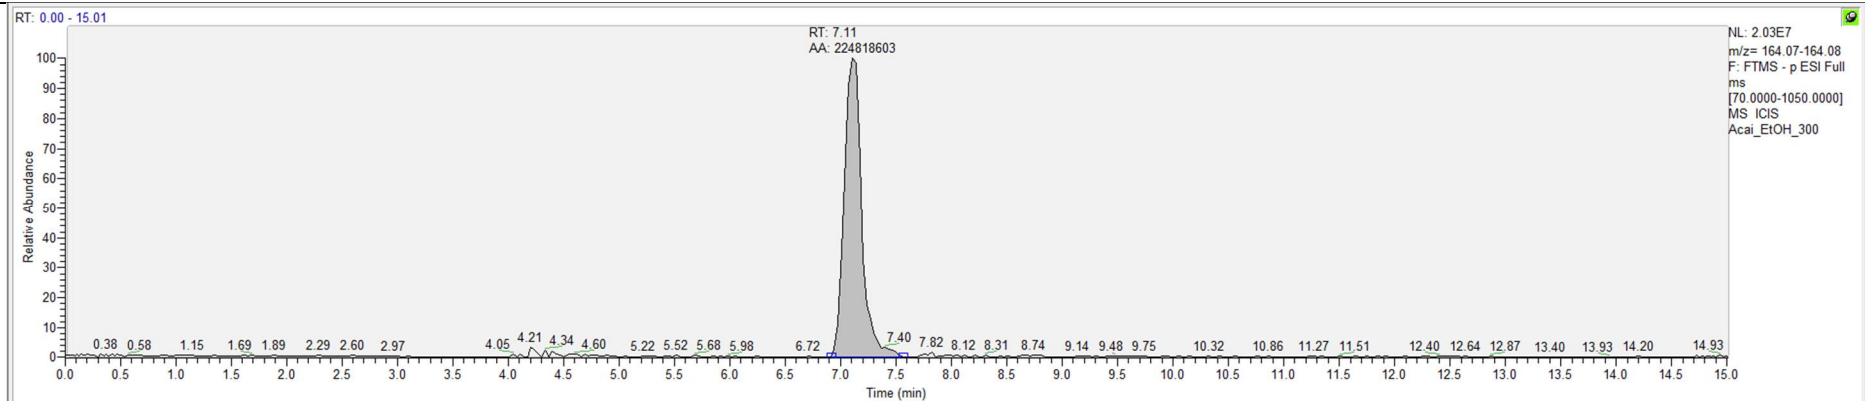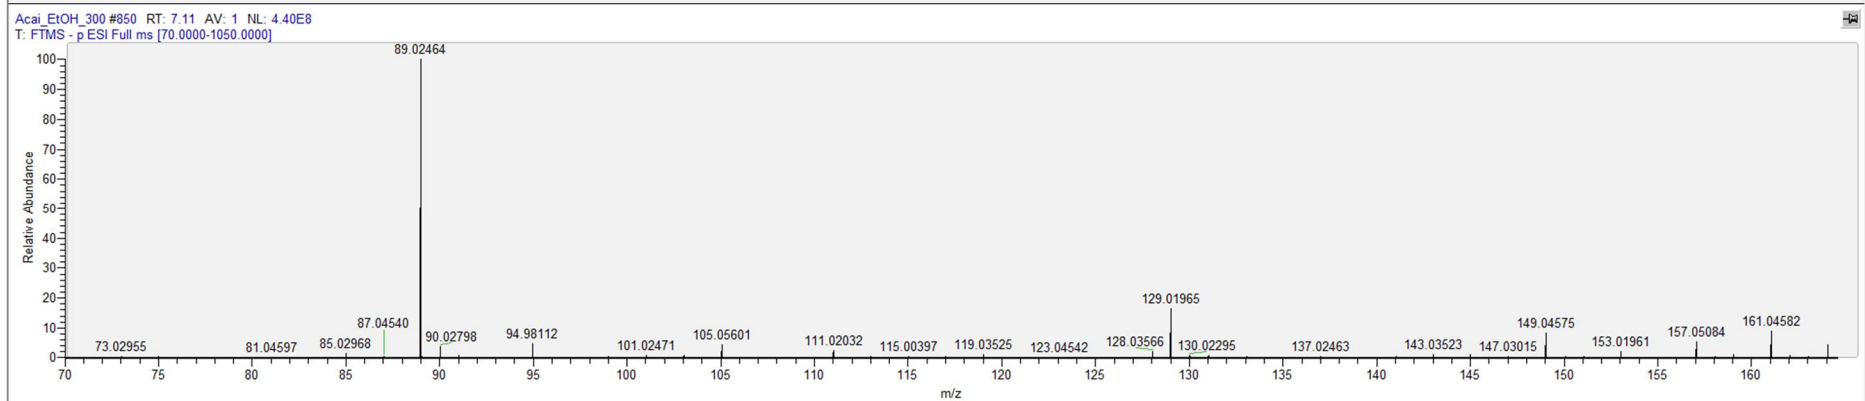

Proline

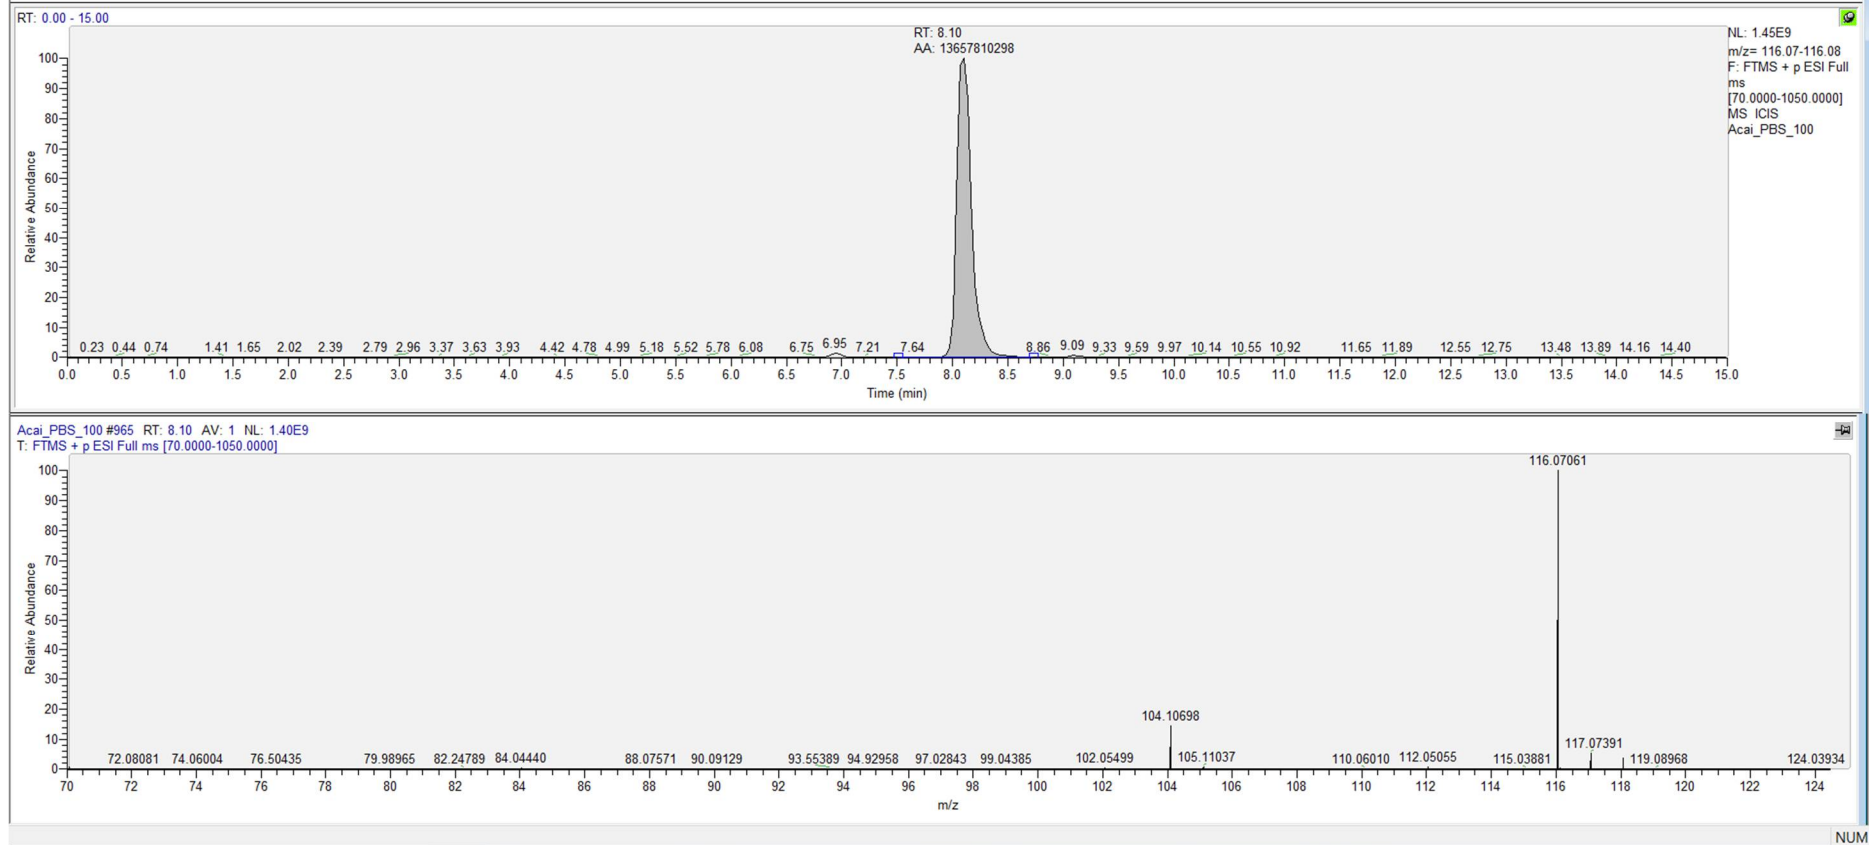

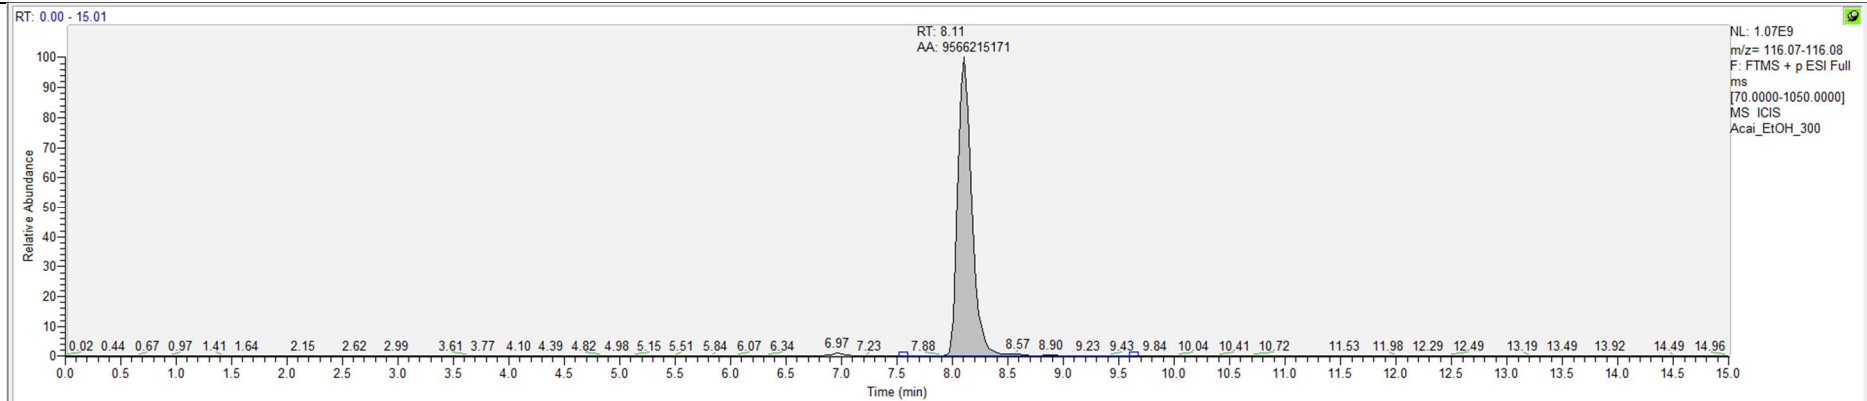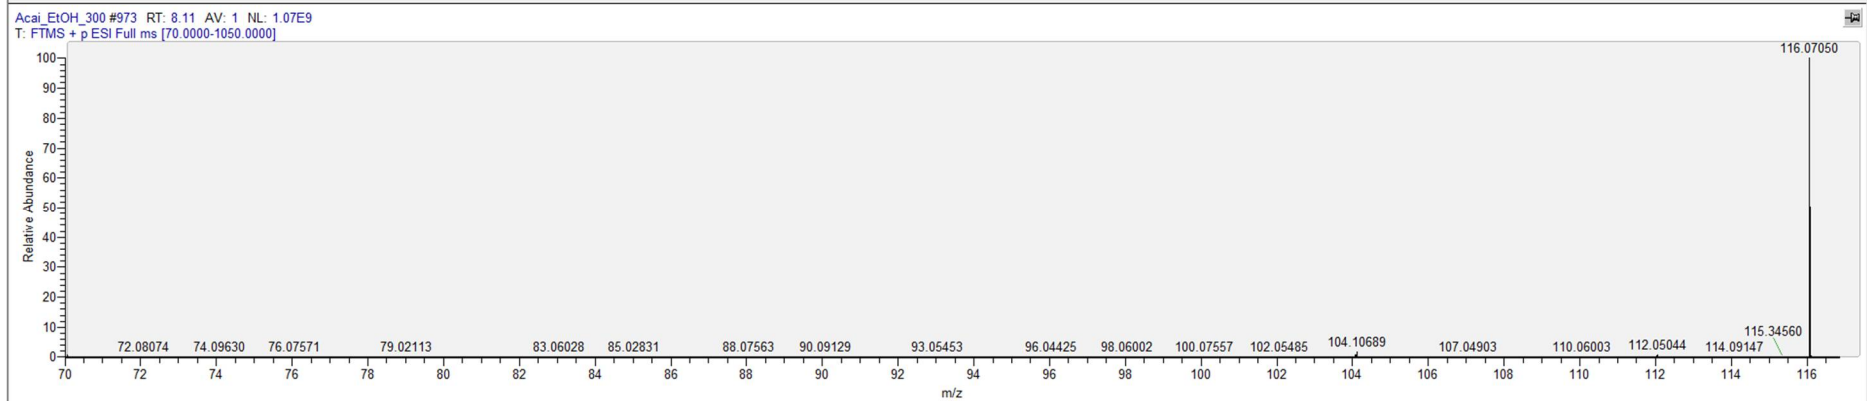

Glutamic acid

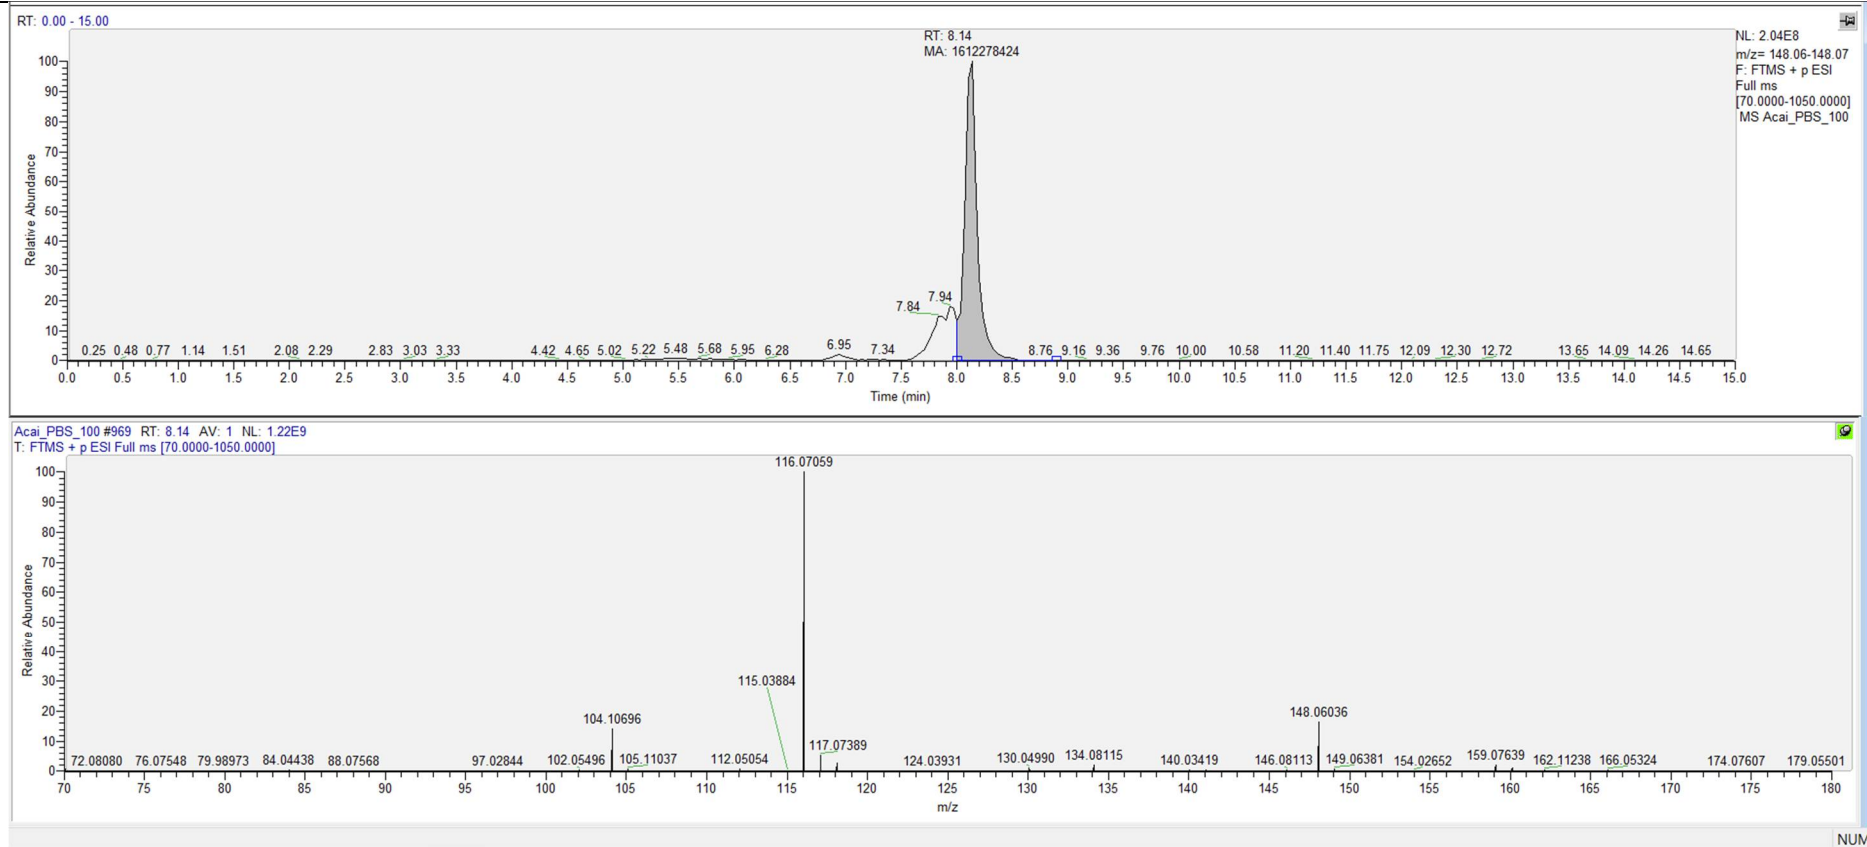

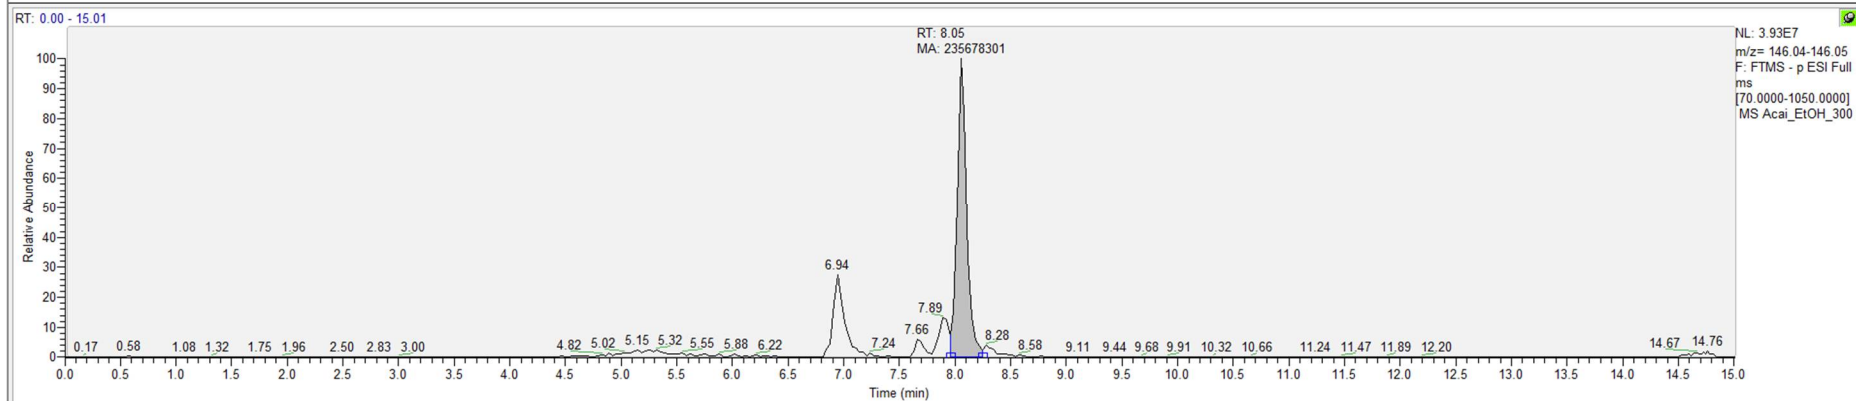

Acai\_EtOH\_300 #966 RT: 8.05 AV: 1 NL: 7.79E7  
T: FTMS - p ESI Full ms [70.0000-1050.0000]

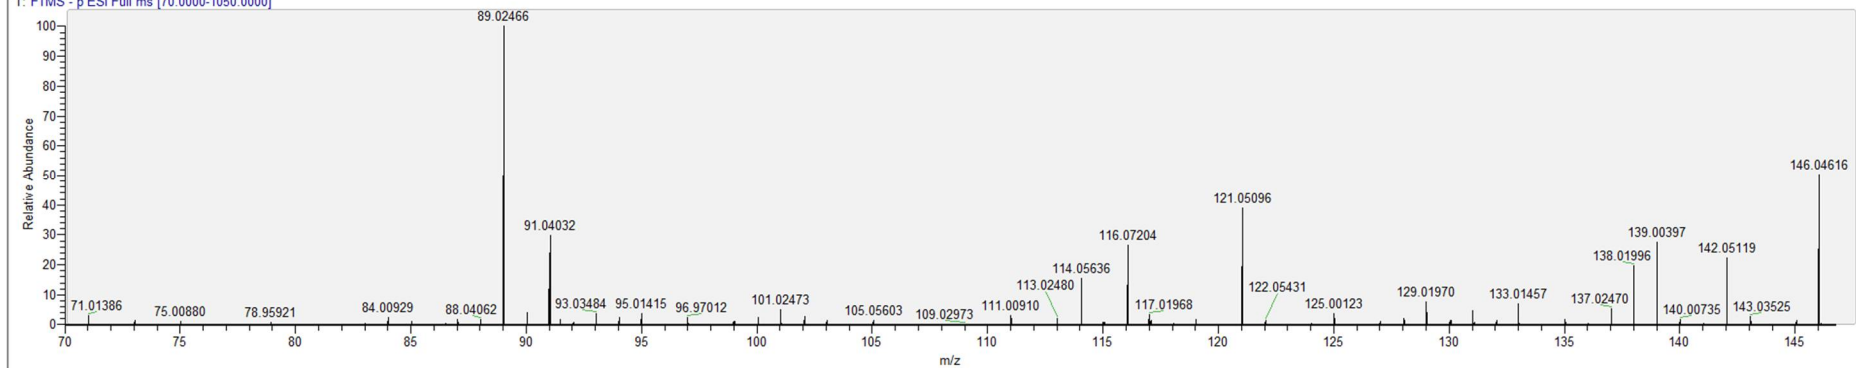

Serine

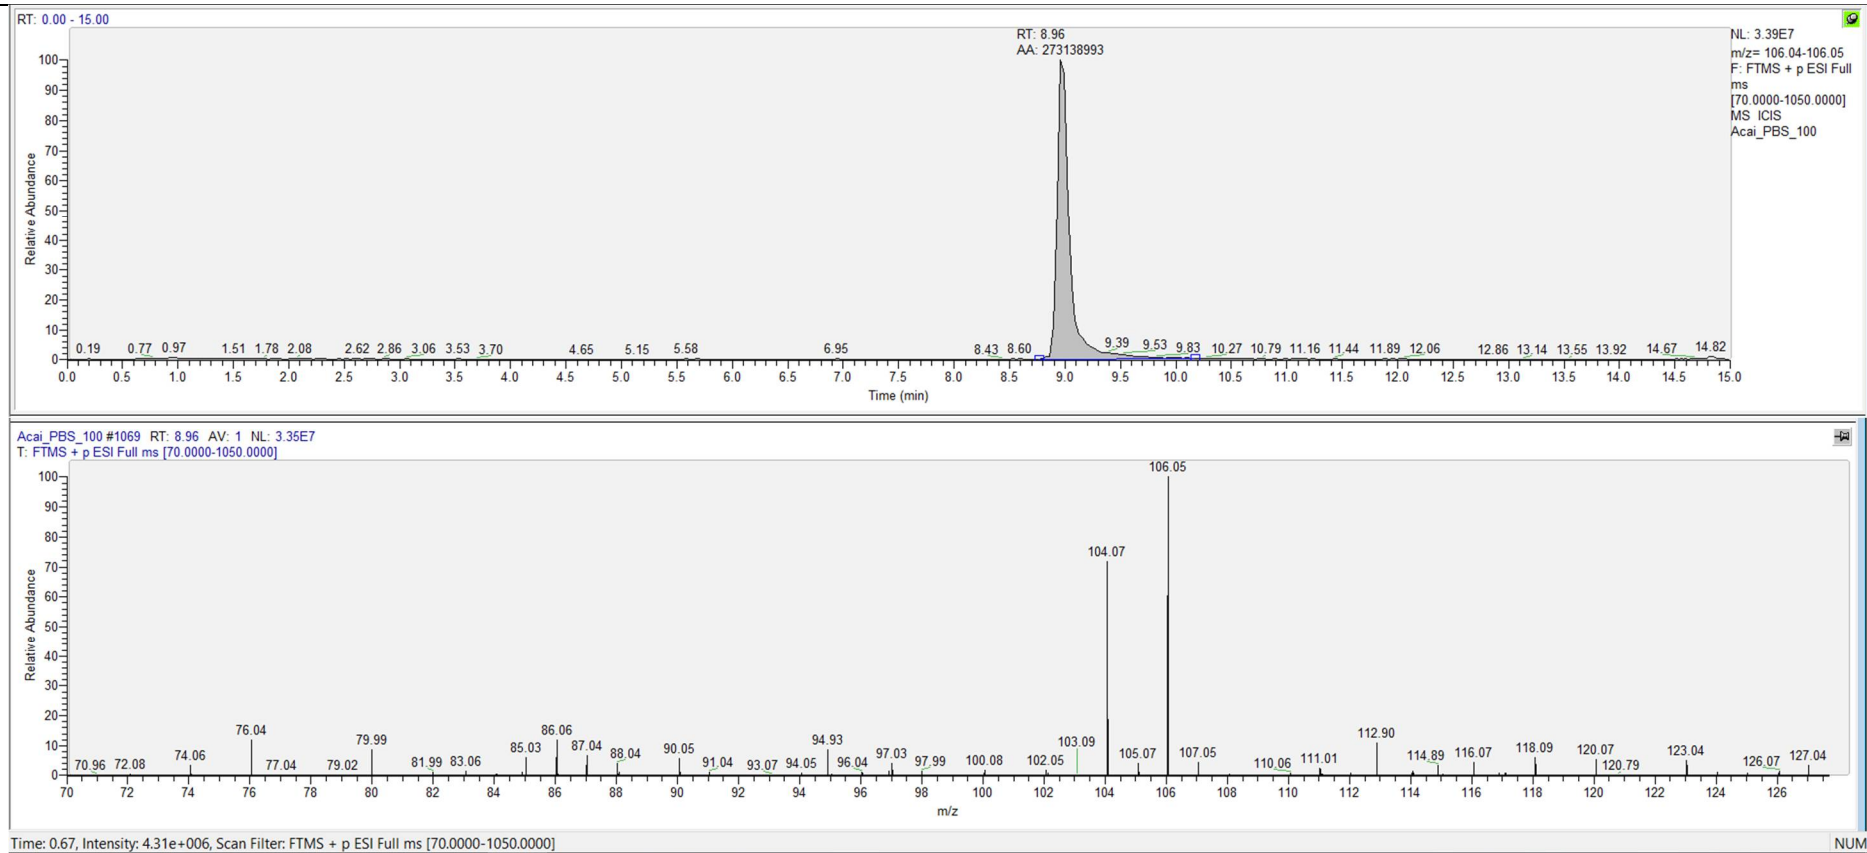

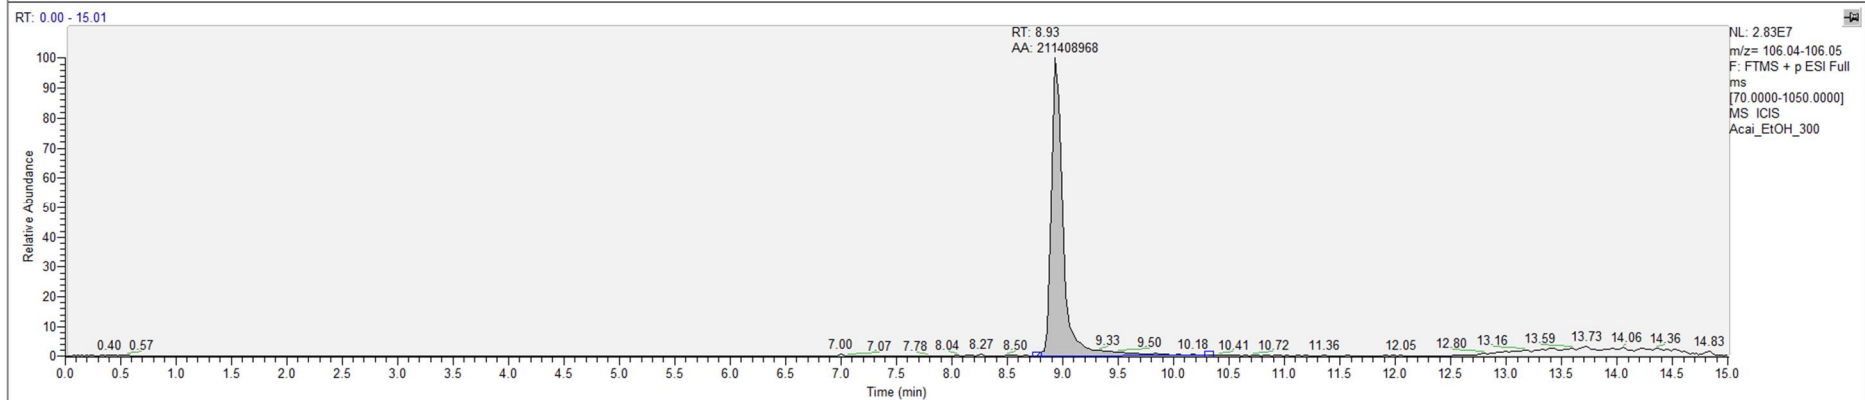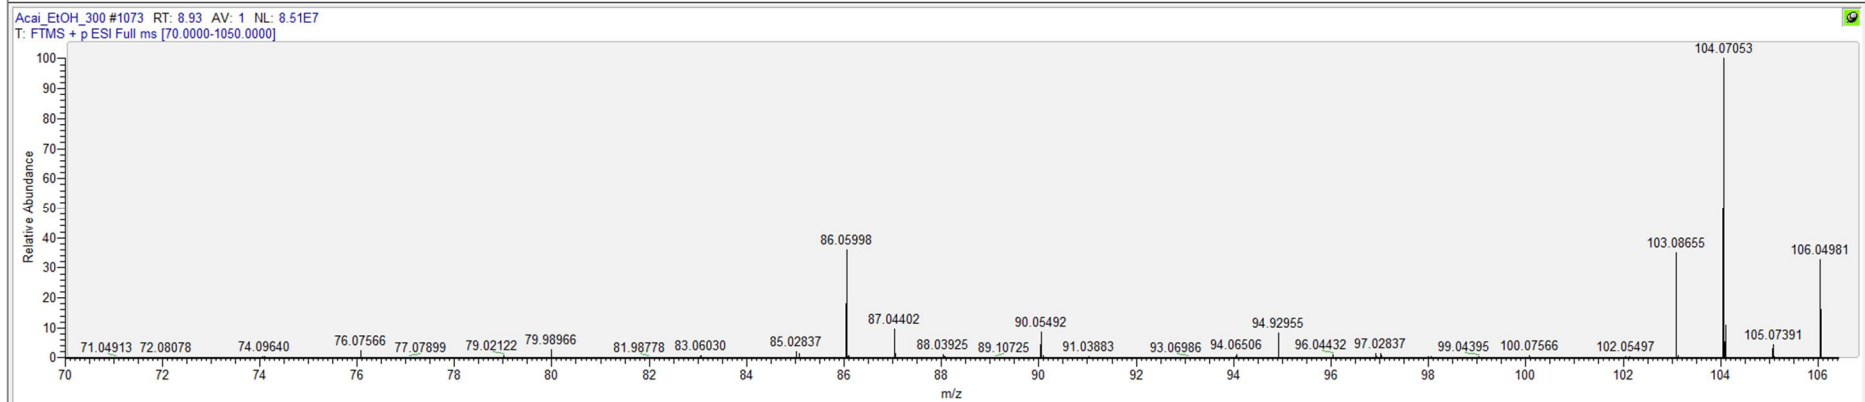



Glycine

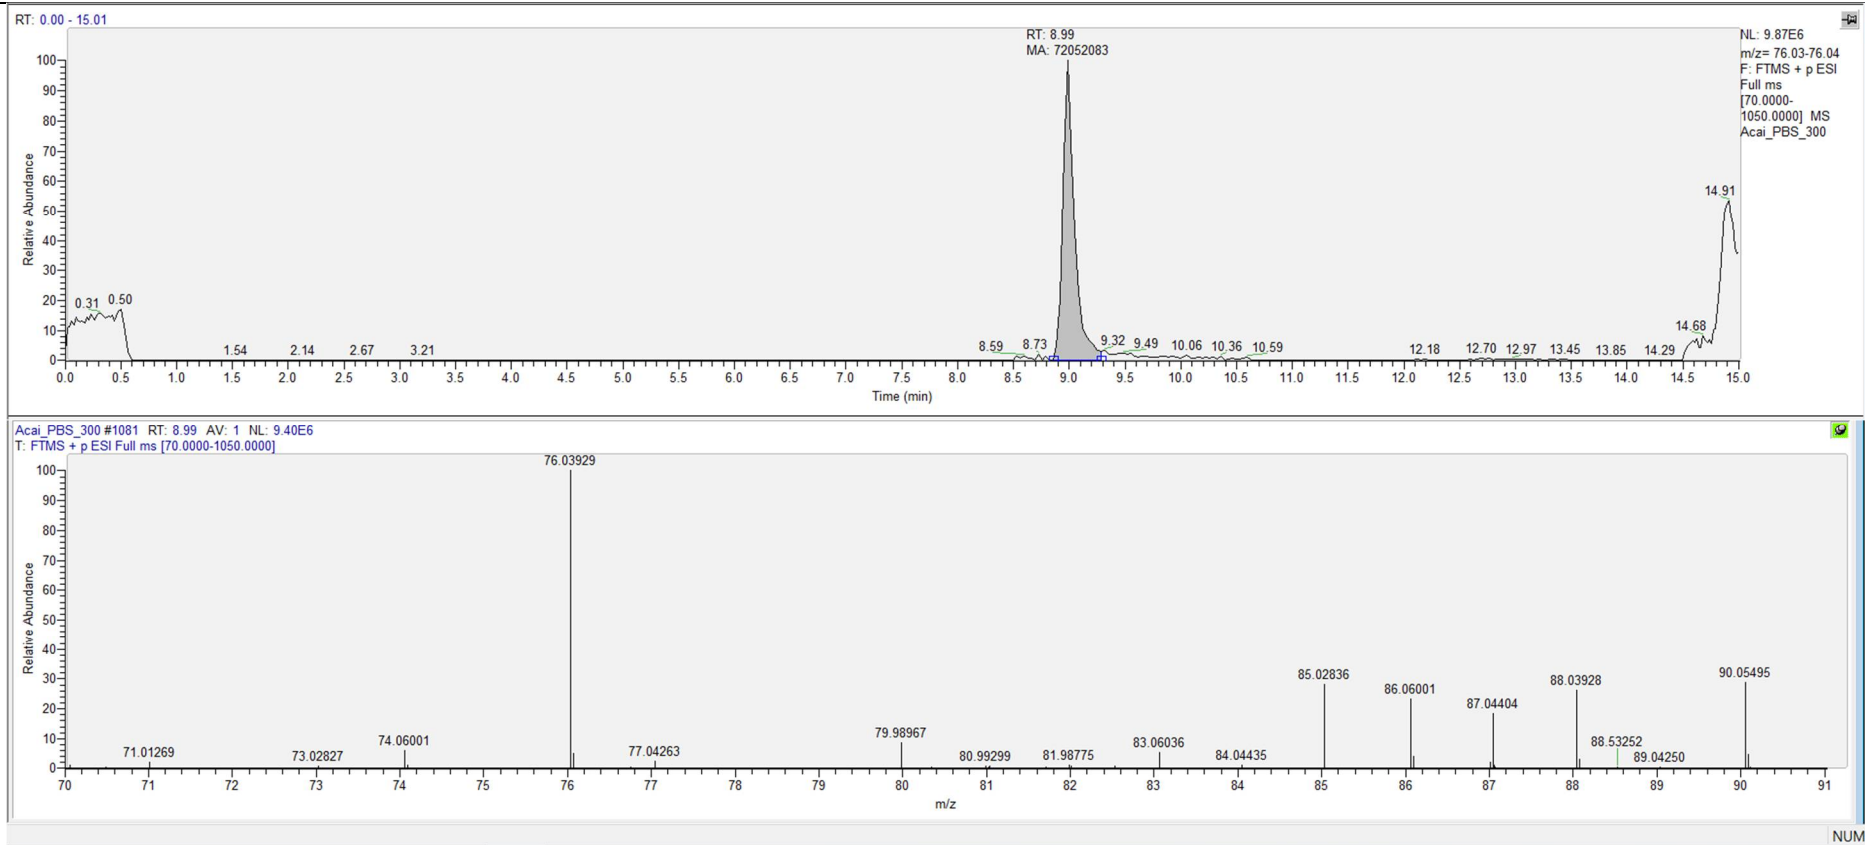

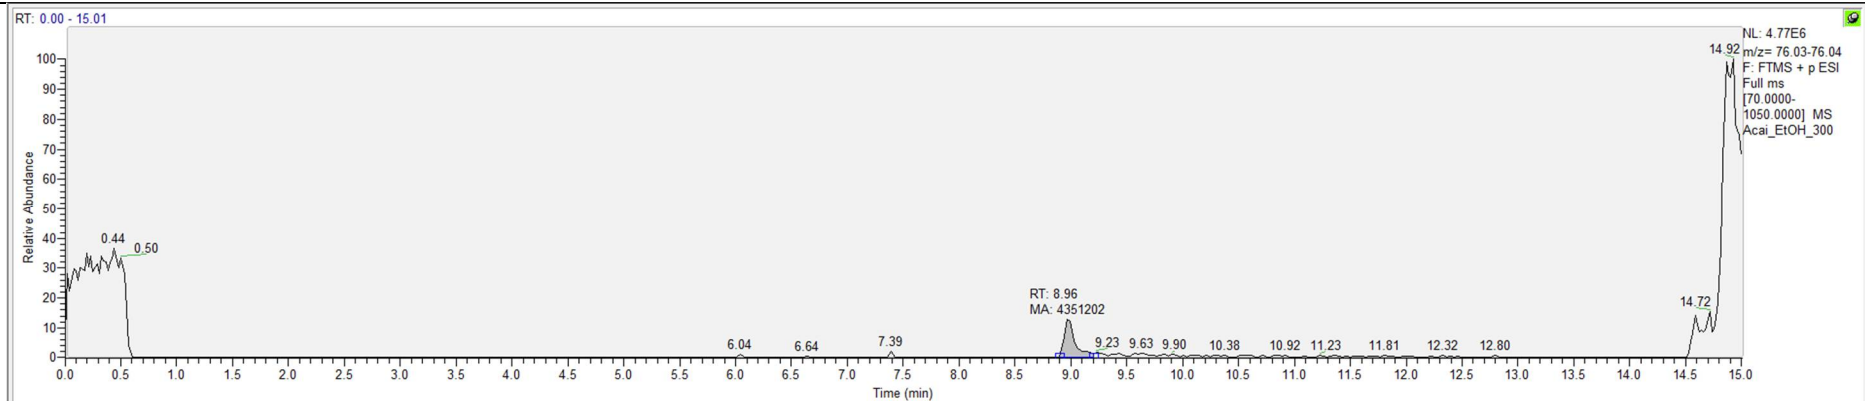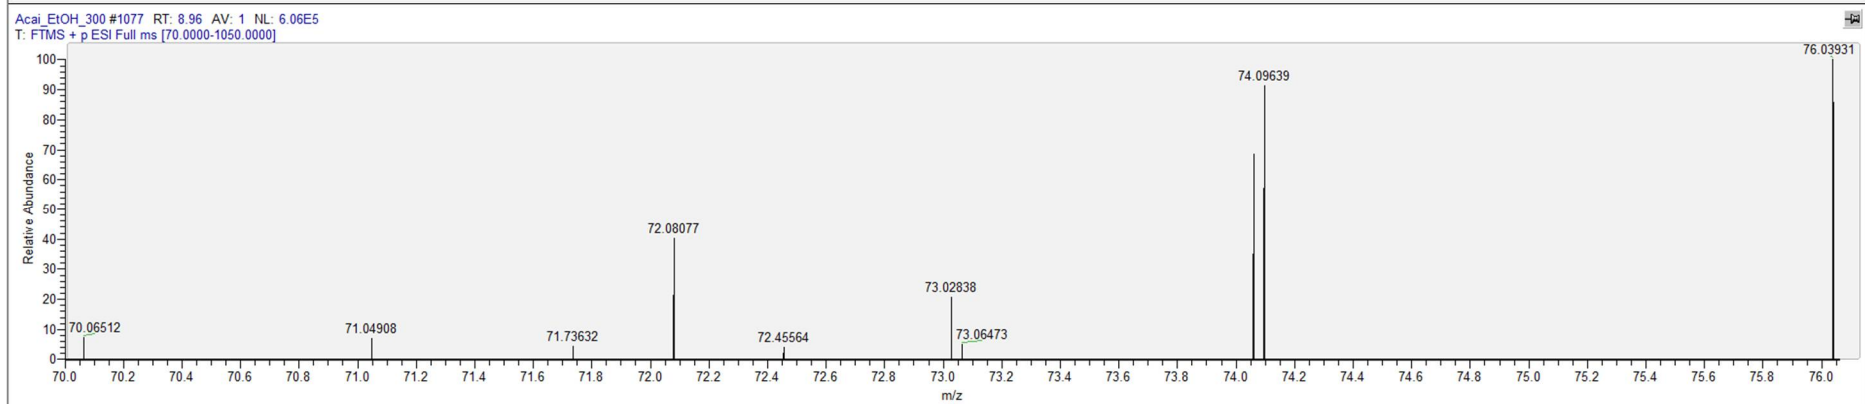

# Threonine

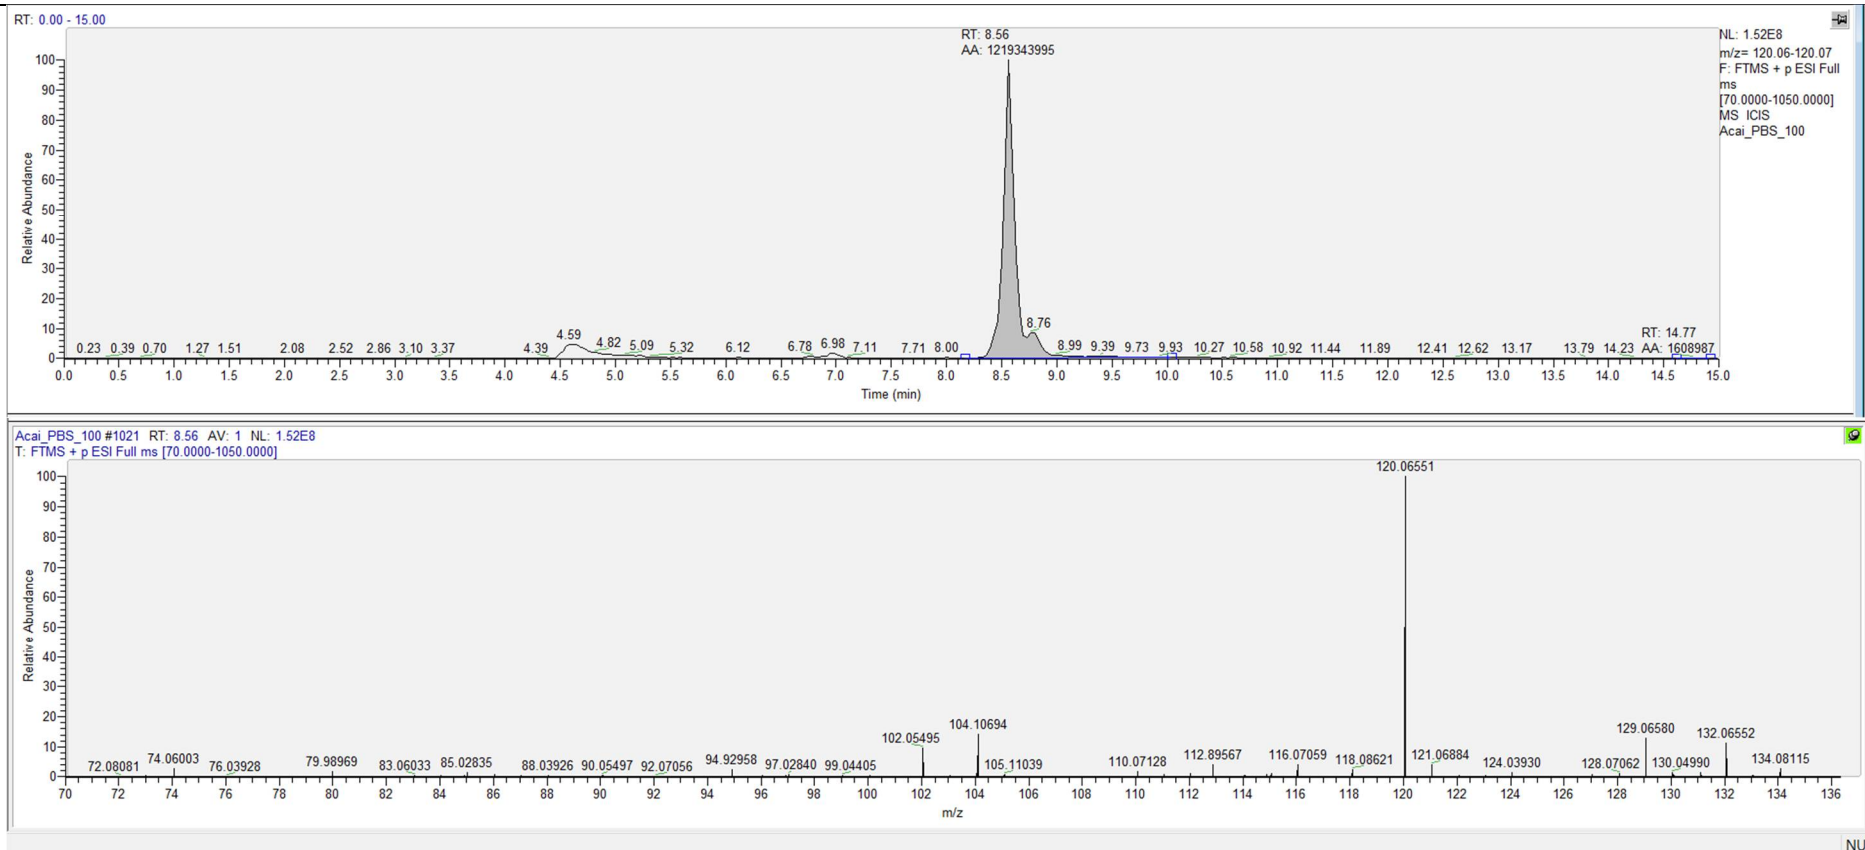

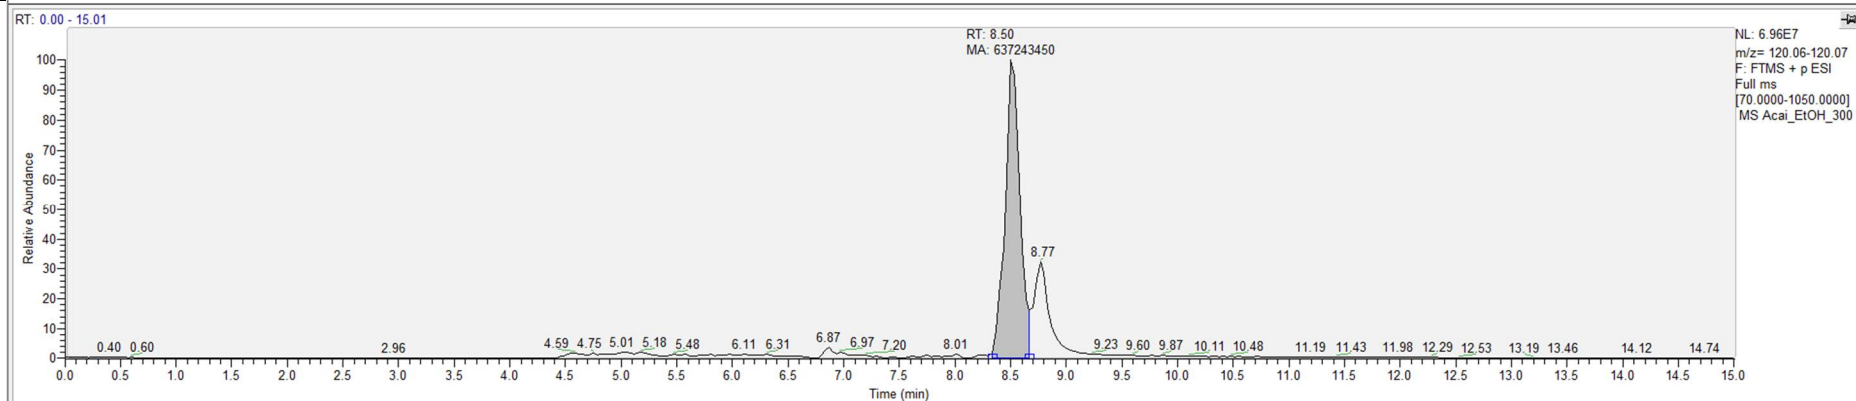

Acai\_EtOH\_300 #1021 RT: 8.50 AV: 1 NL: 6.92E7  
T: FTMS + p ESI Full ms [70.0000-1050.0000]

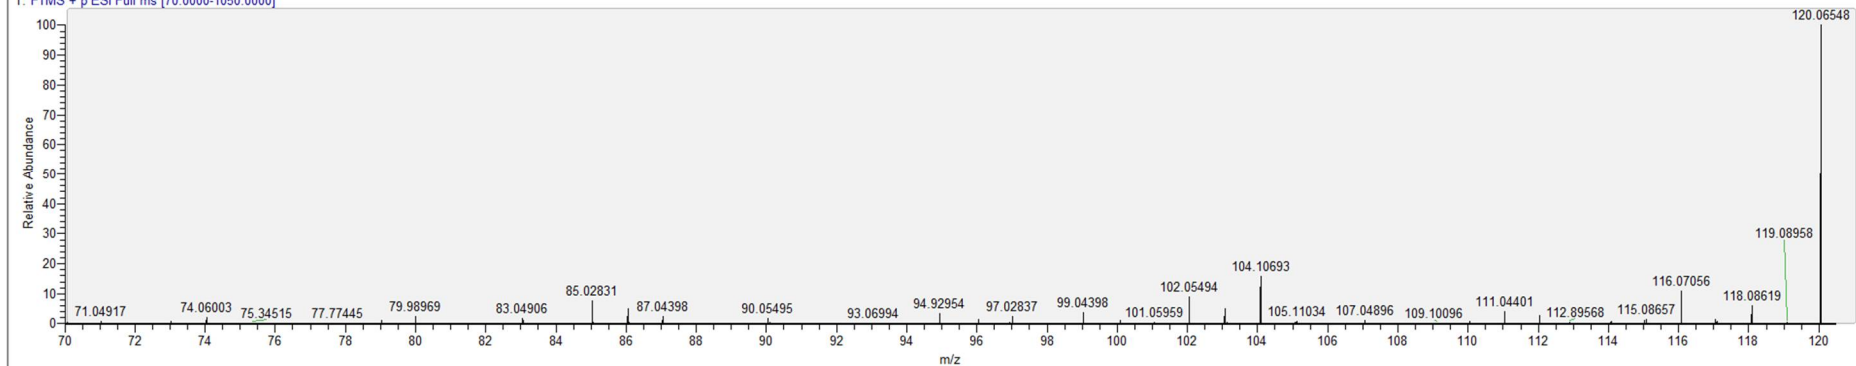

Histidine

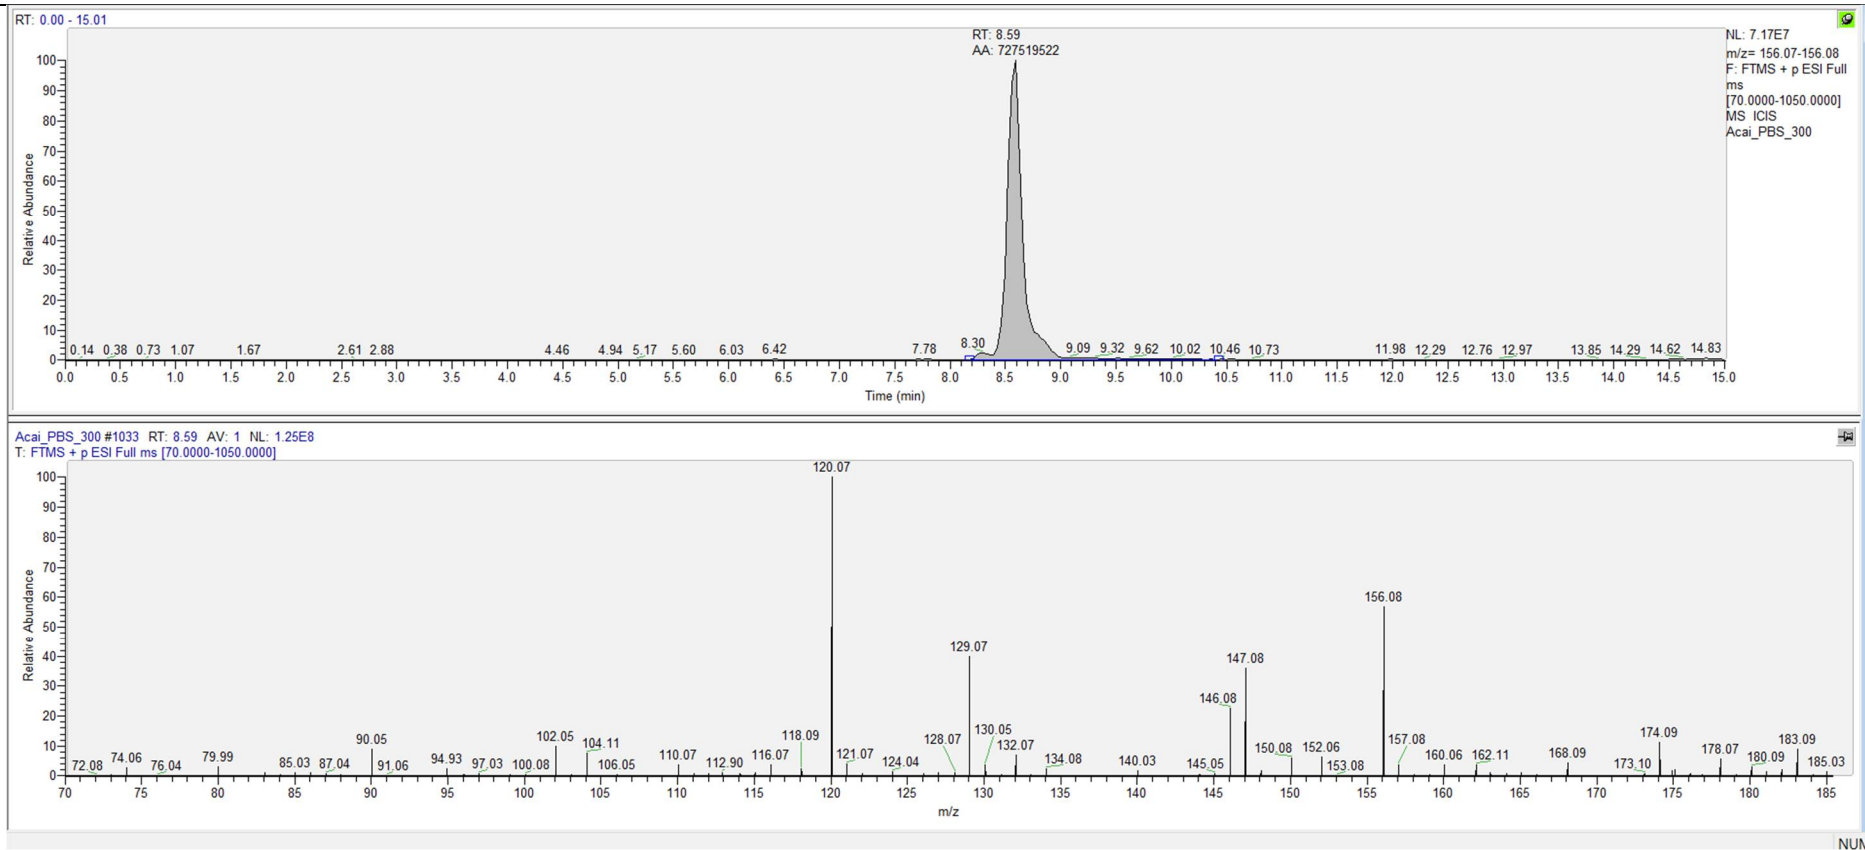

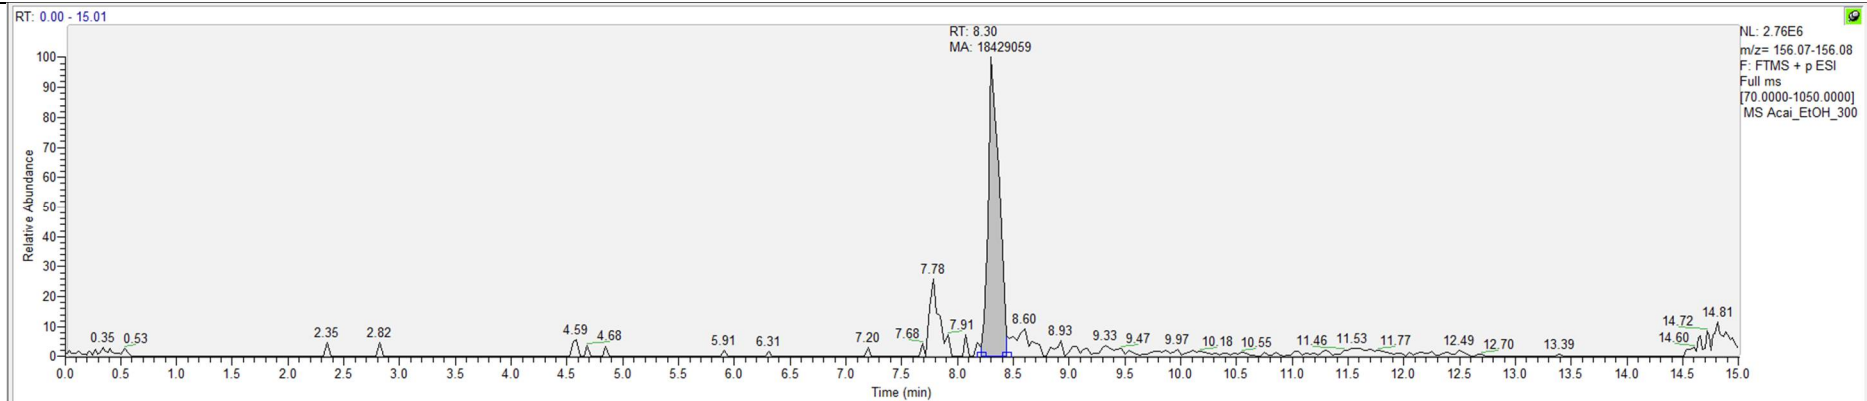

Acai\_EtOH\_300 #997 RT: 8.30 AV: 1 NL: 5.21E7  
T: FTMS + p ESI Full ms [70.0000-1050.0000]

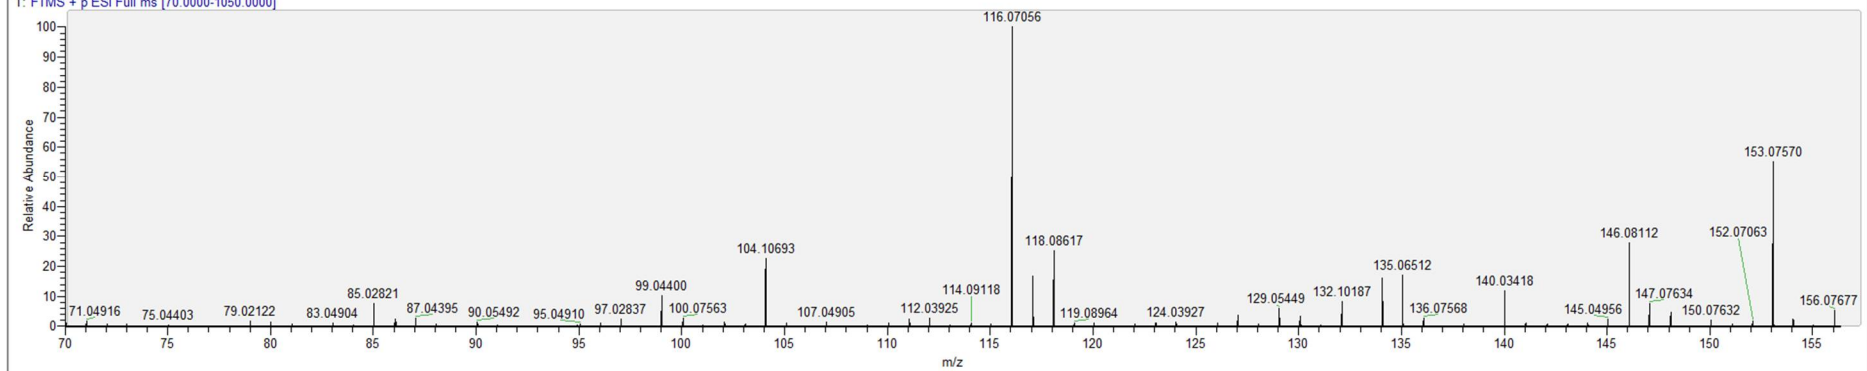

# Tryptophan

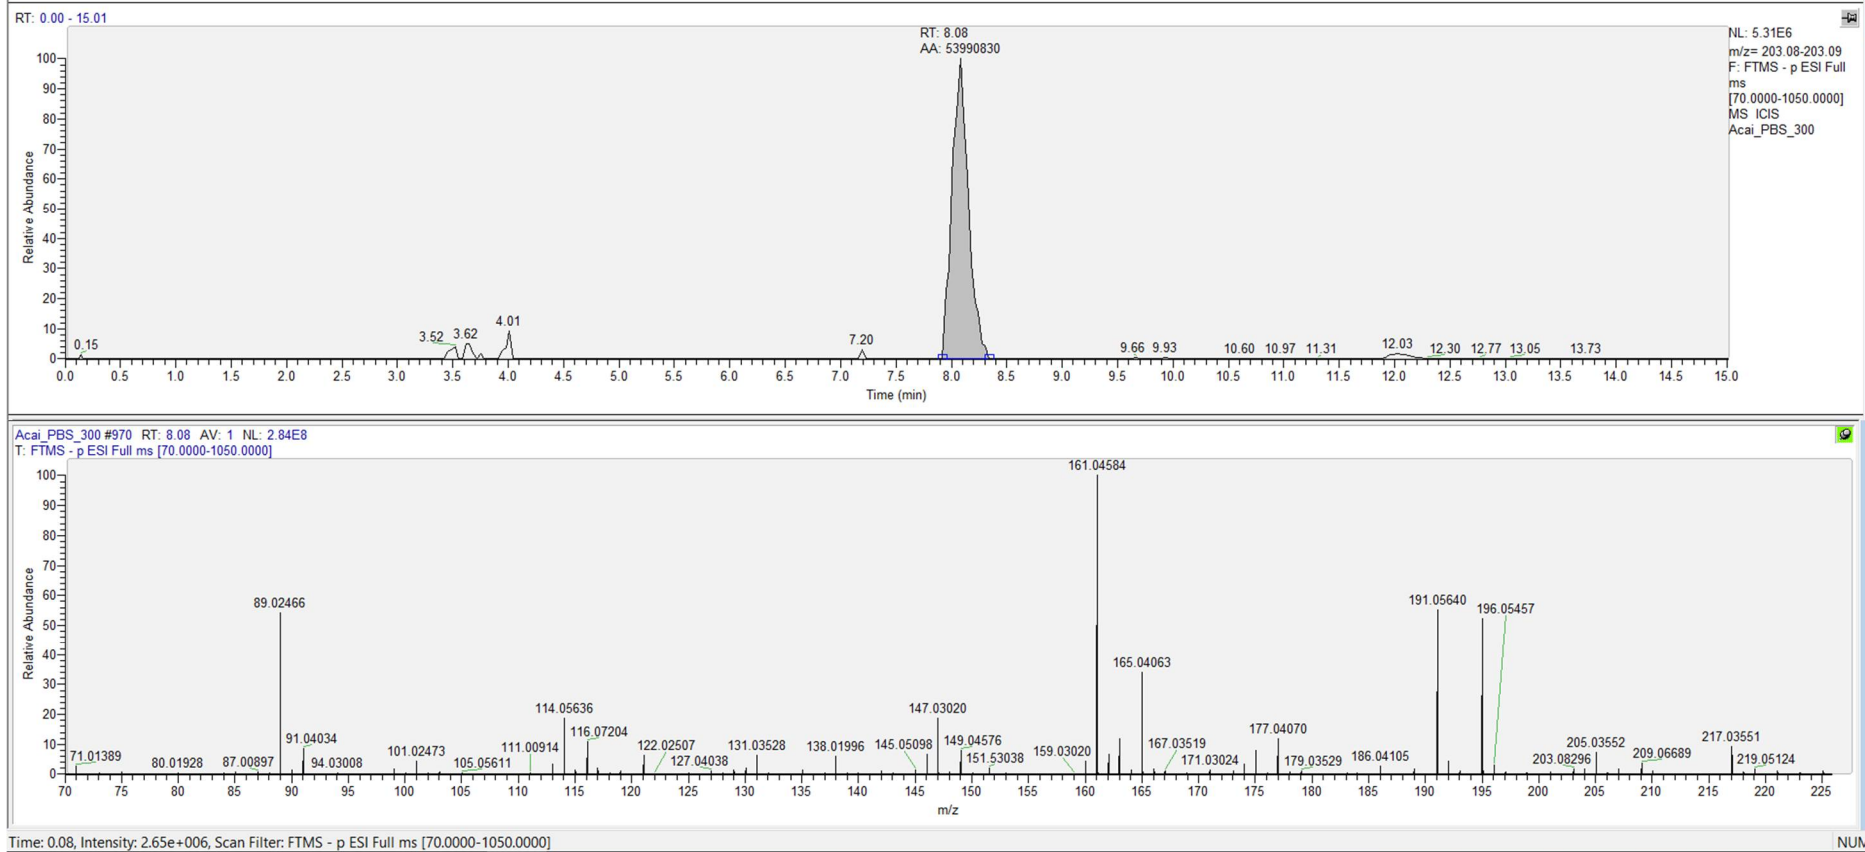

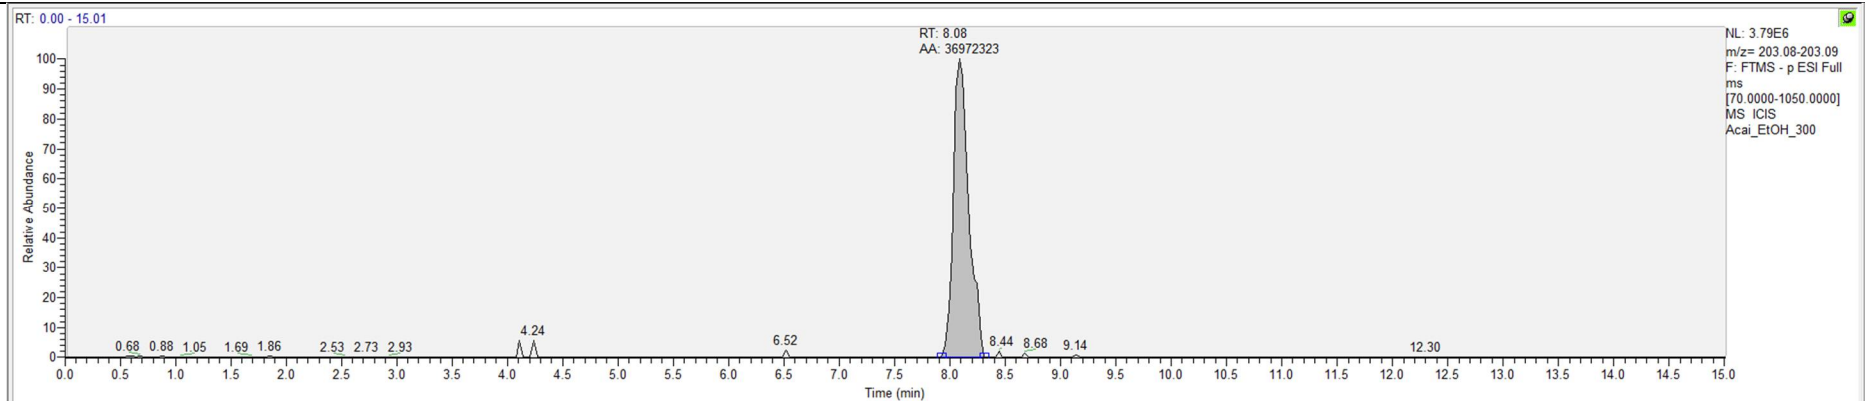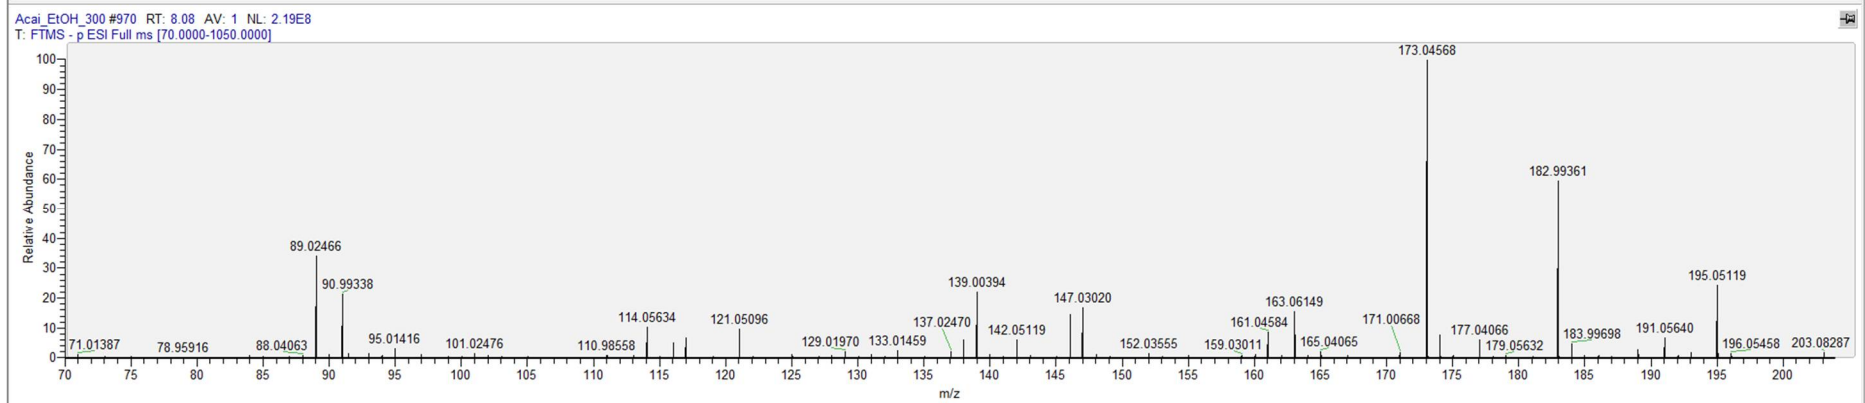



Tyrosine

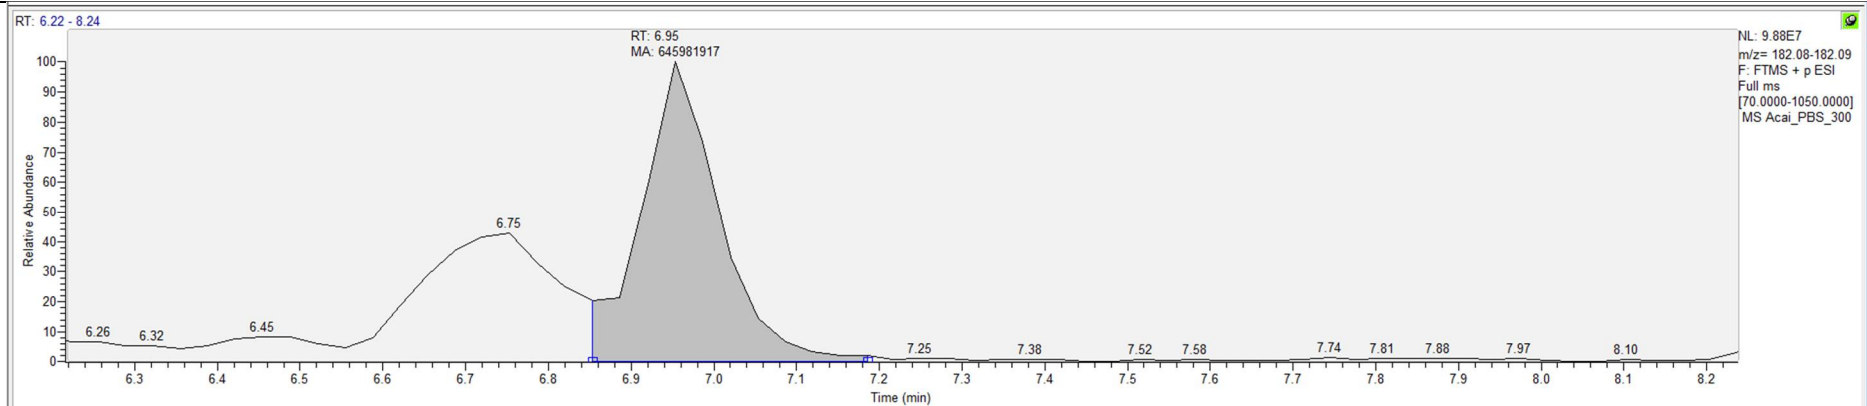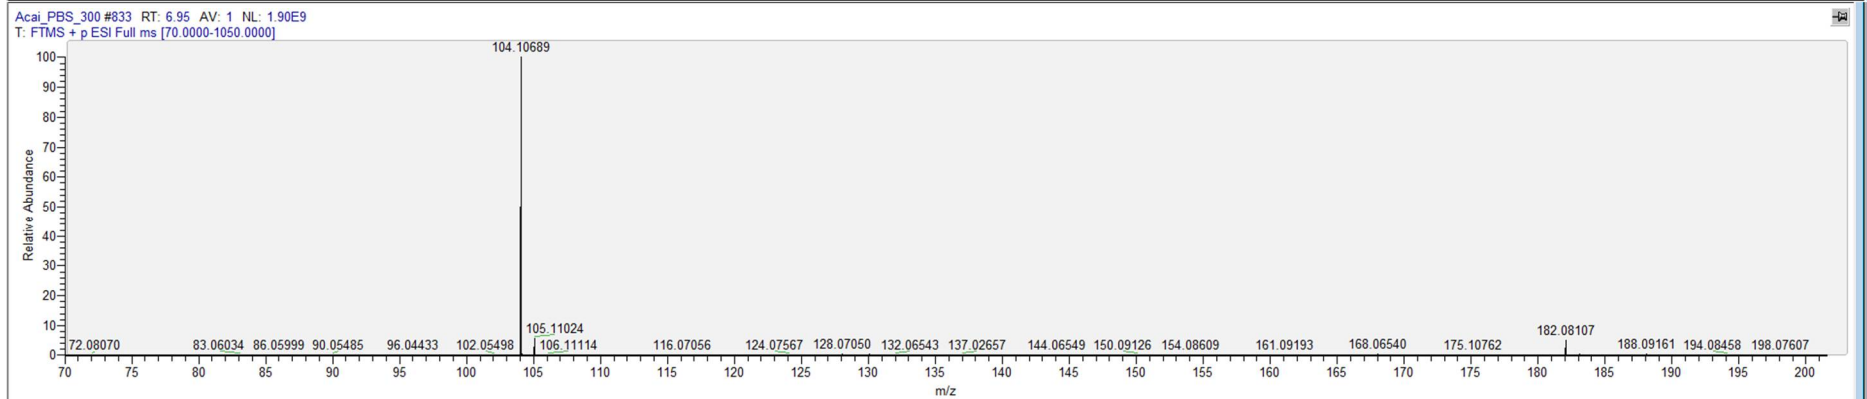

NUM

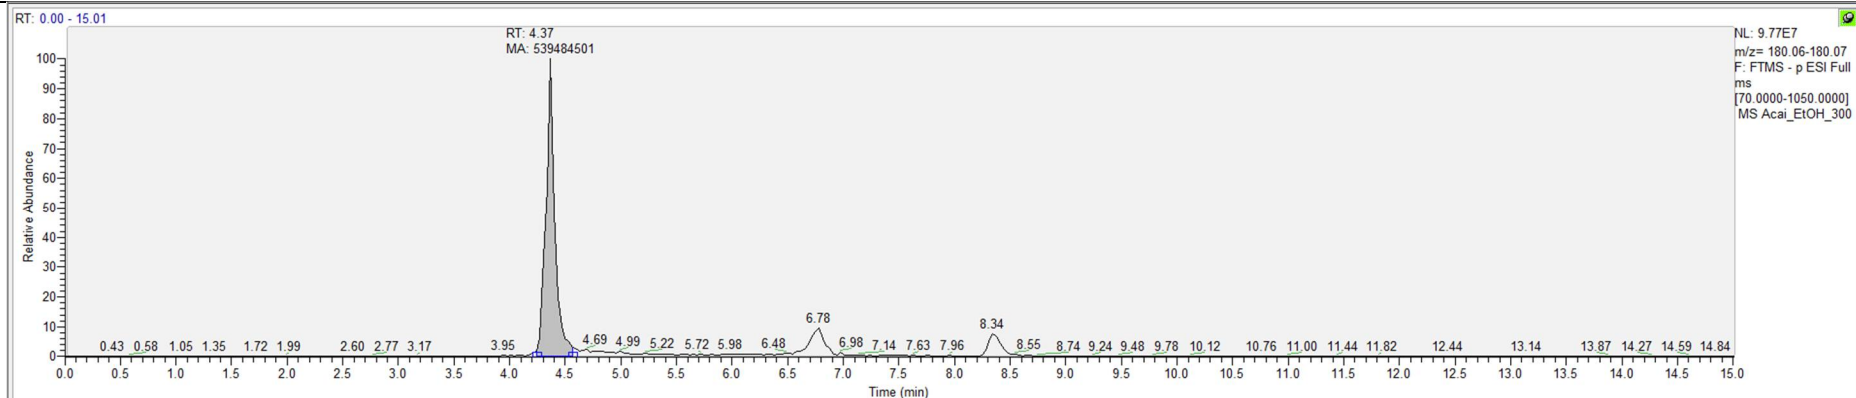

Acai\_EtOH\_300 #518 RT: 4.37 AV: 1 NL: 4.04E8  
T: FTMS - p ESI Full ms [70.0000-1050.0000]

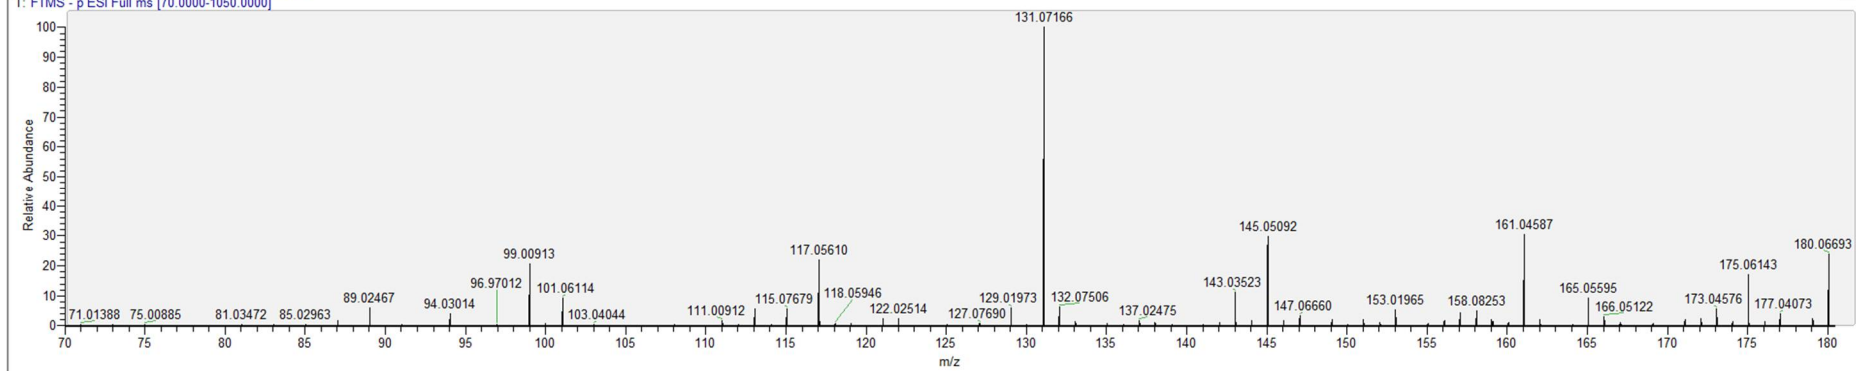

NUM

Isoleucine

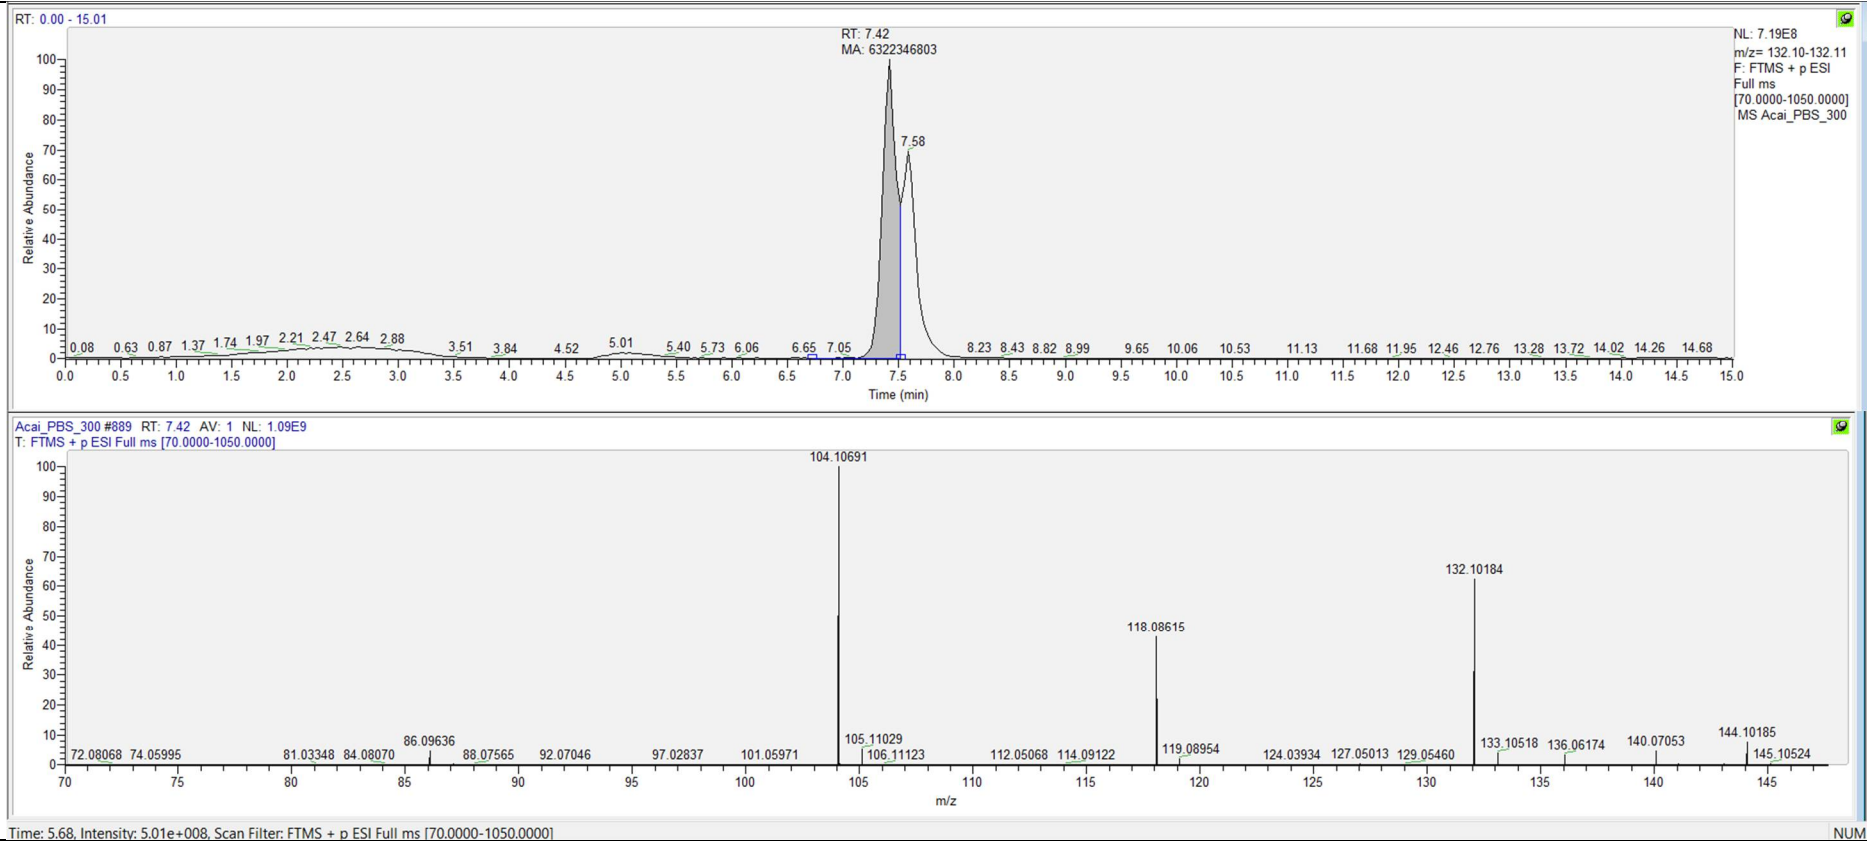

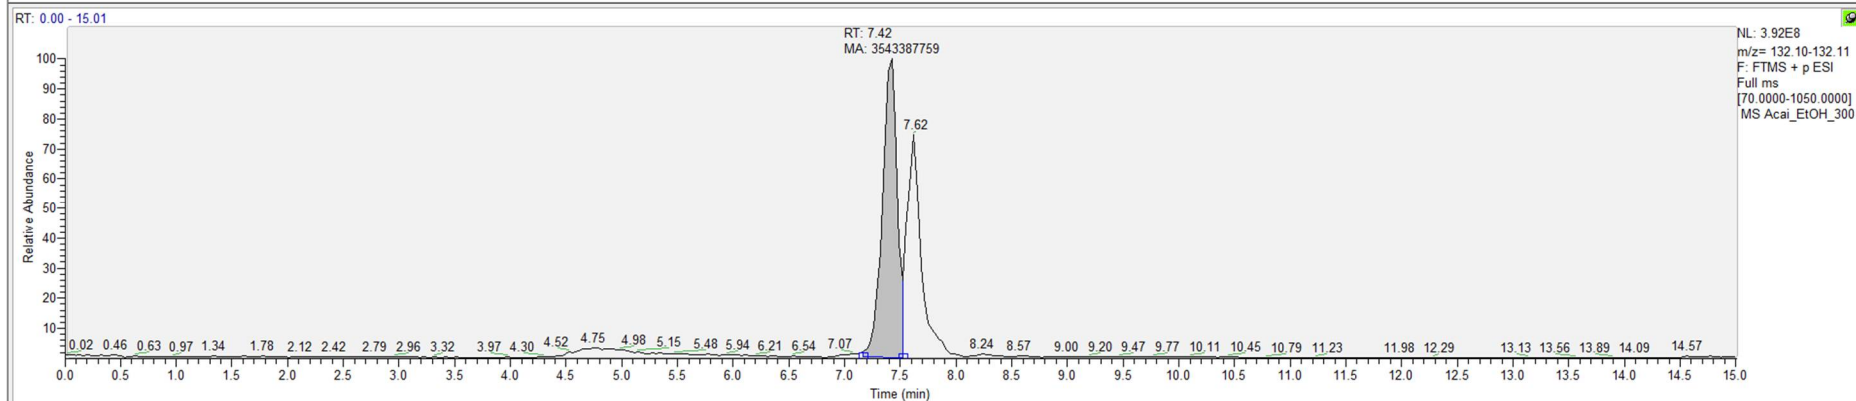

Acai\_EtOH\_300 #889 RT: 7.42 AV: 1 NL: 3.79E8  
T: FTMS + p ESI Full ms [70.0000-1050.0000]

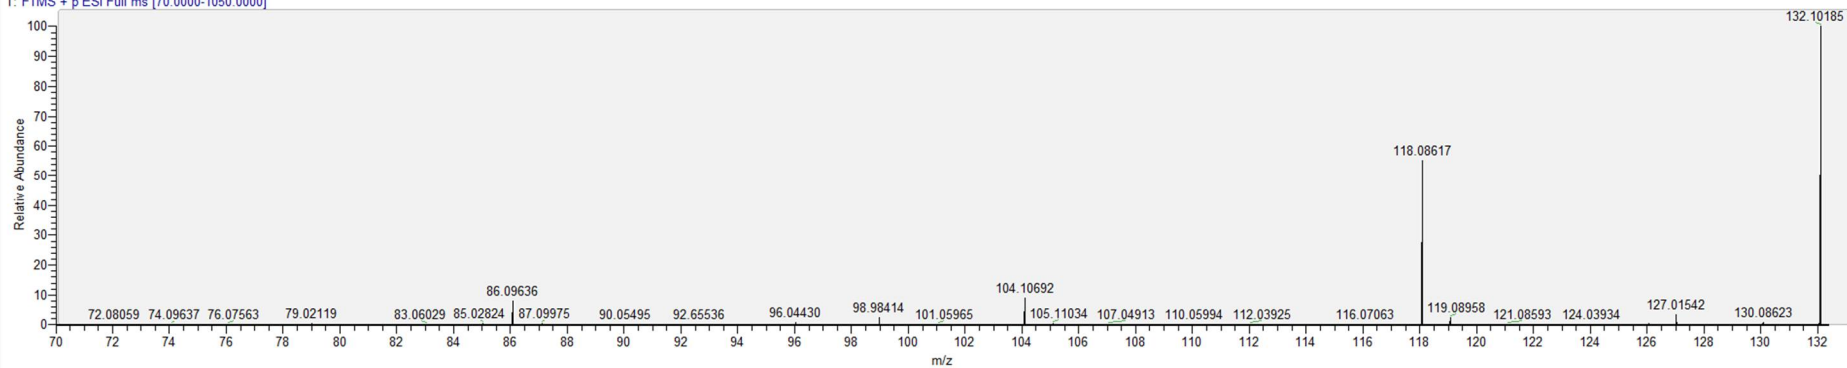

Valine

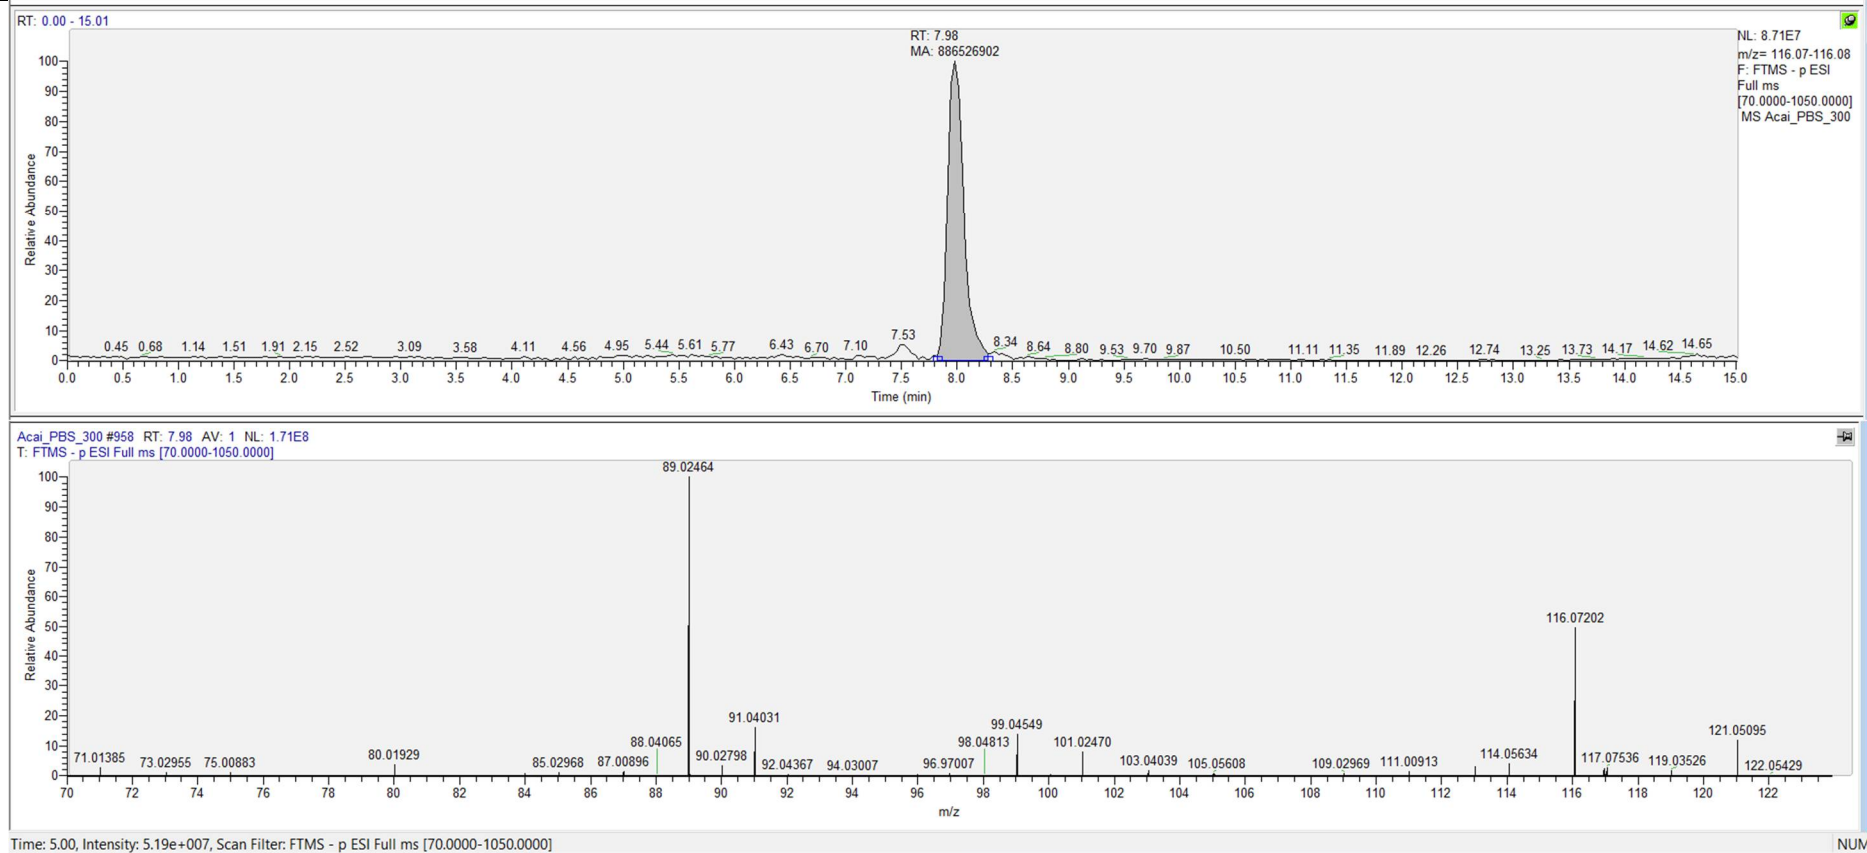

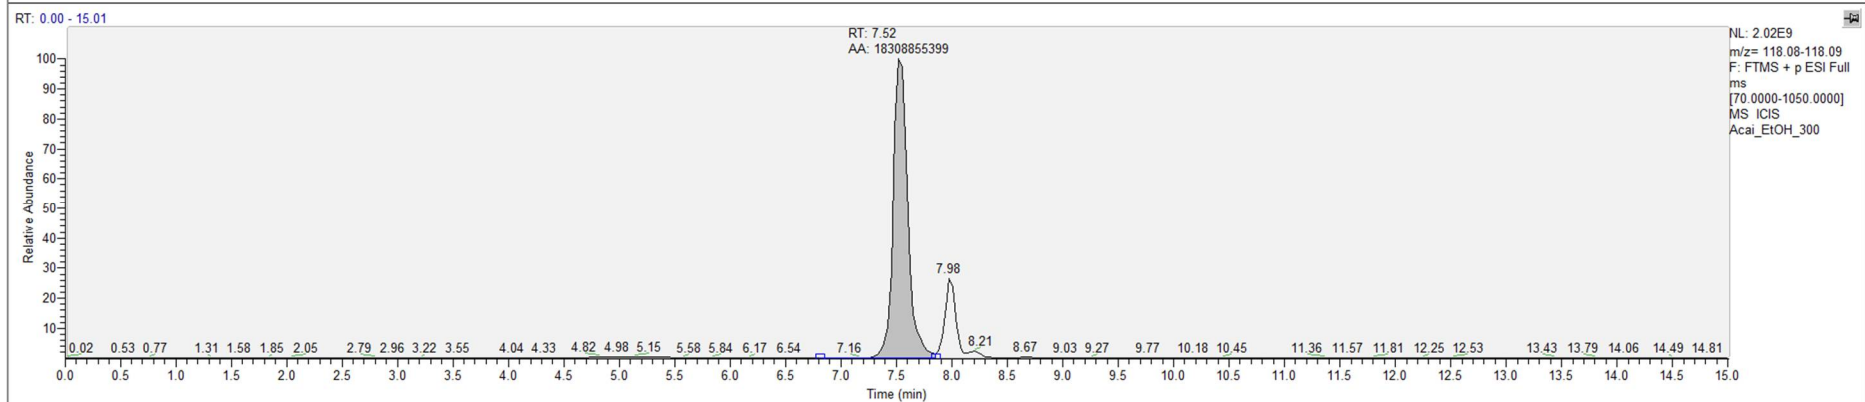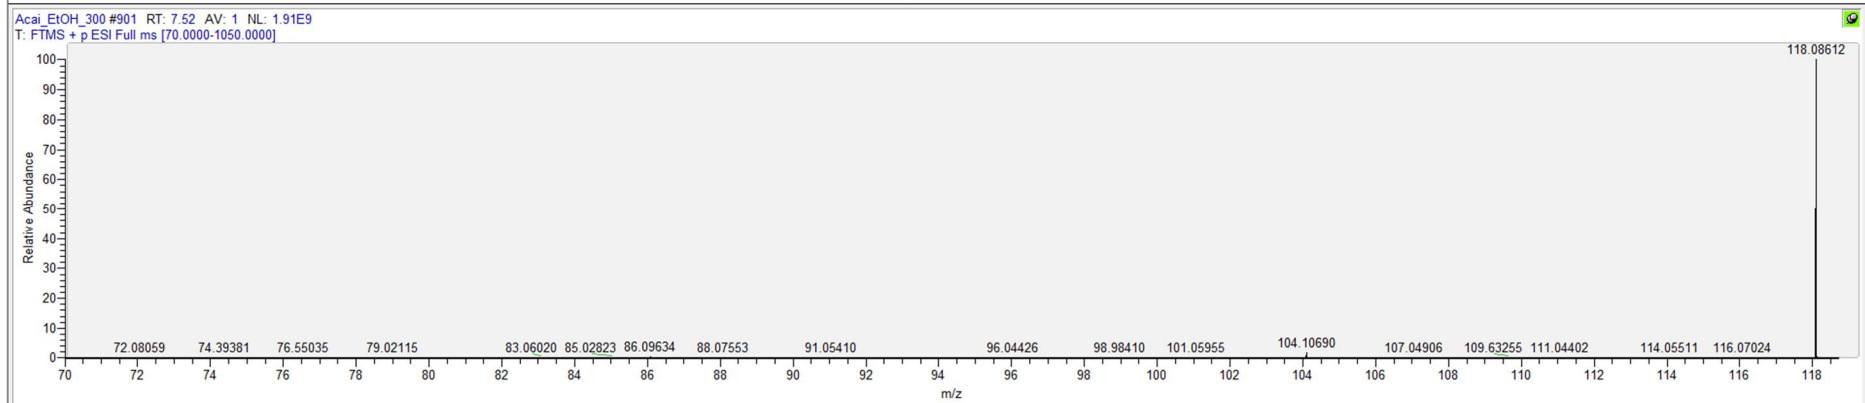

Leucine

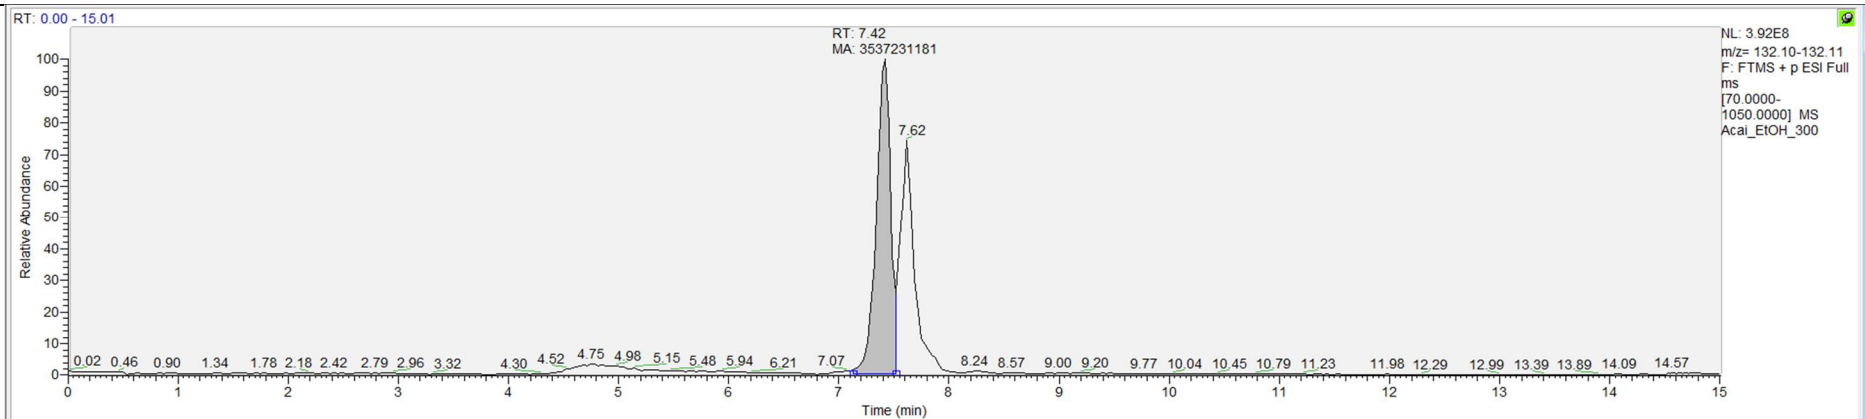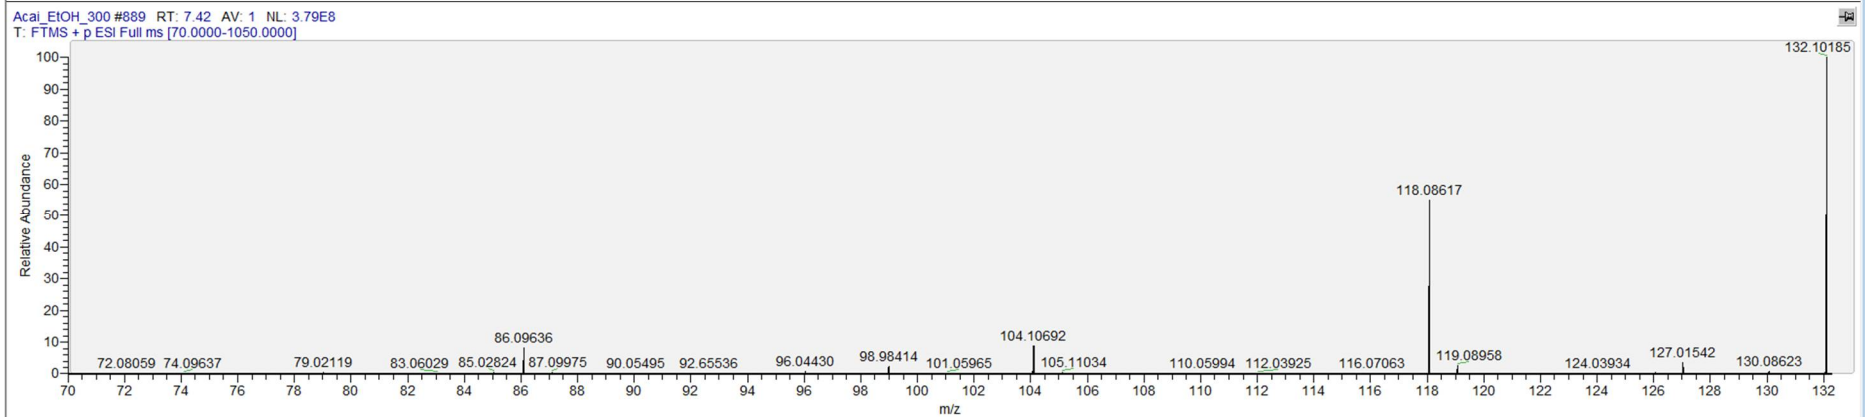

Cellotetraose

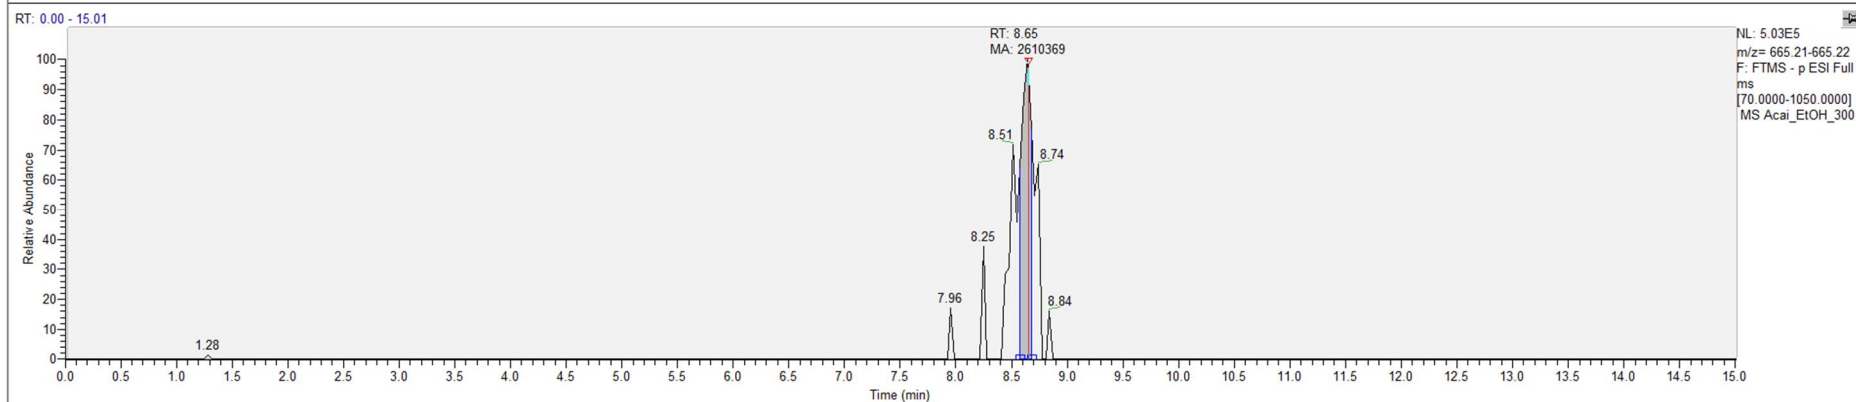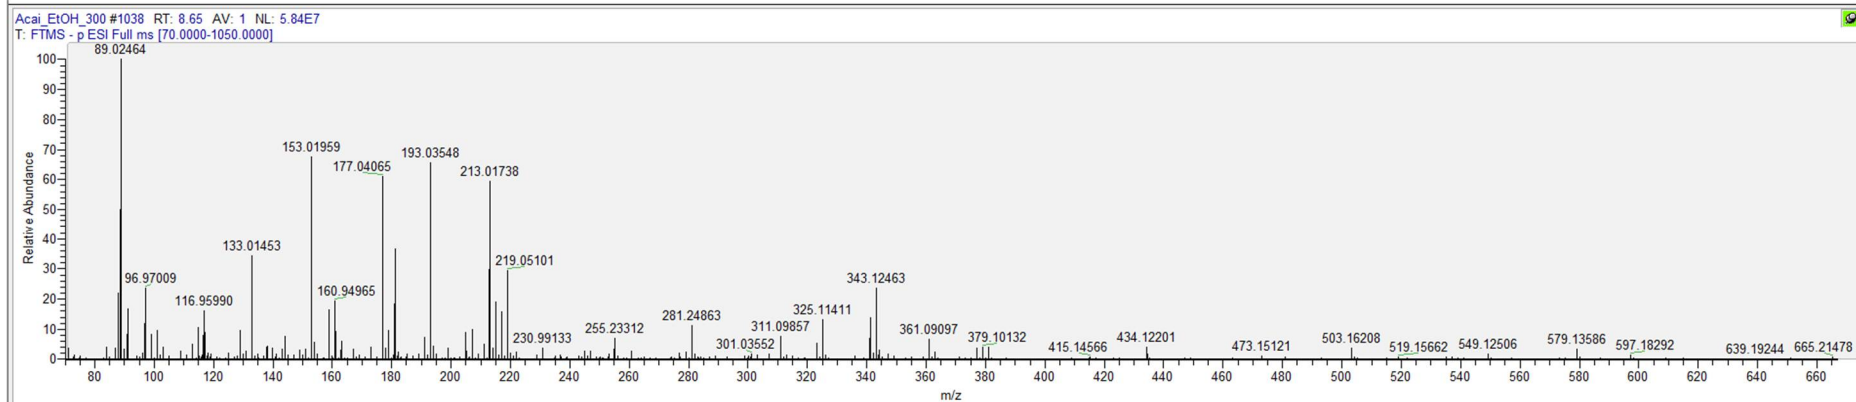



Sucrose

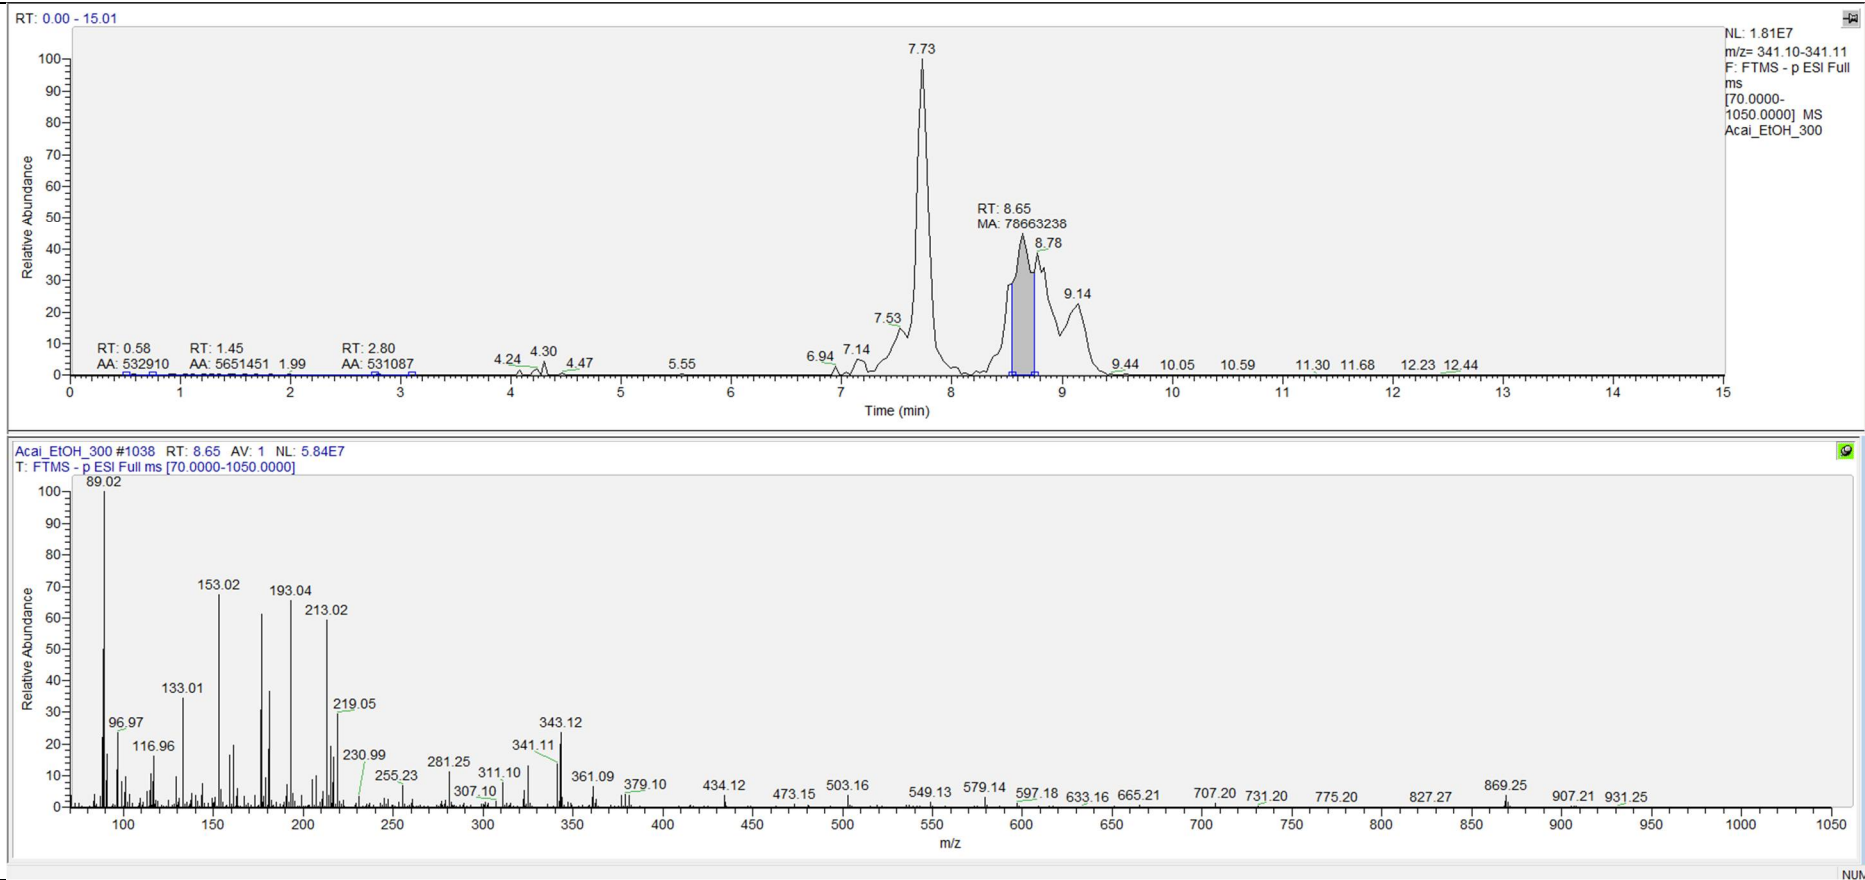

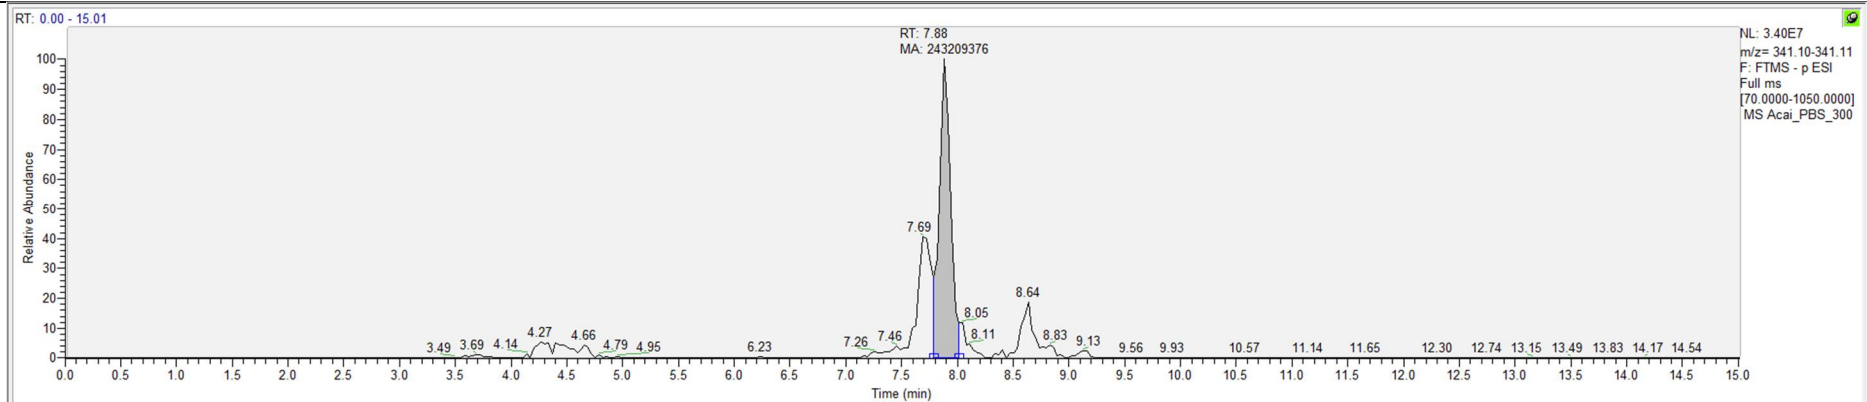

Acai\_PBS\_300 #946 RT: 7.88 AV: 1 NL: 2.90E9  
T: FTMS - p ESI Full ms [70.0000-1050.0000]

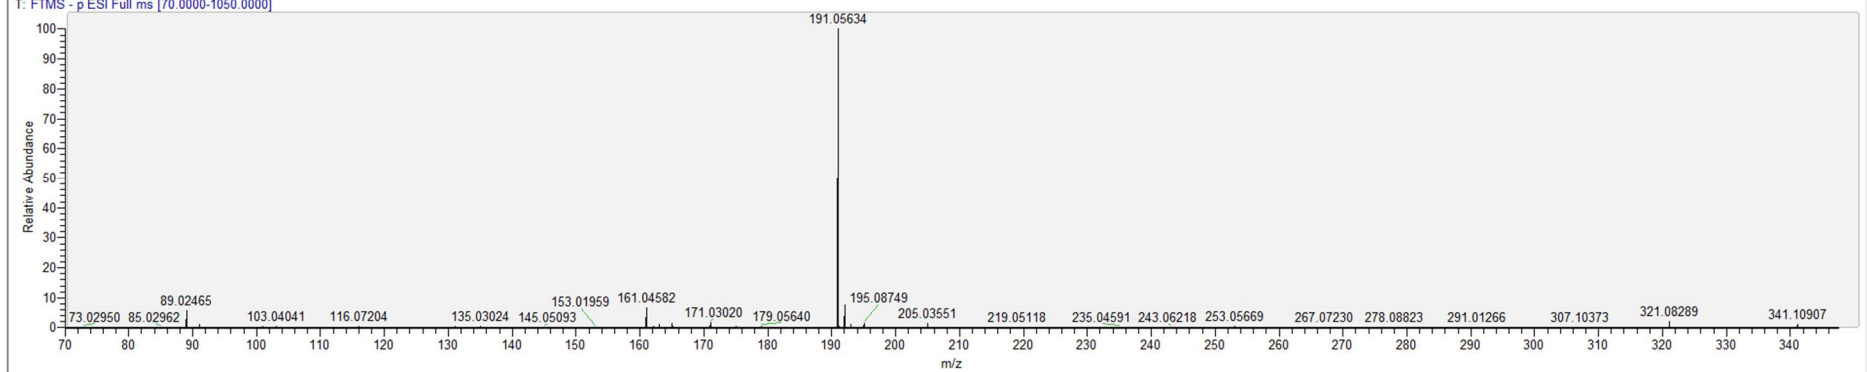

Quinic acid isomer  
1

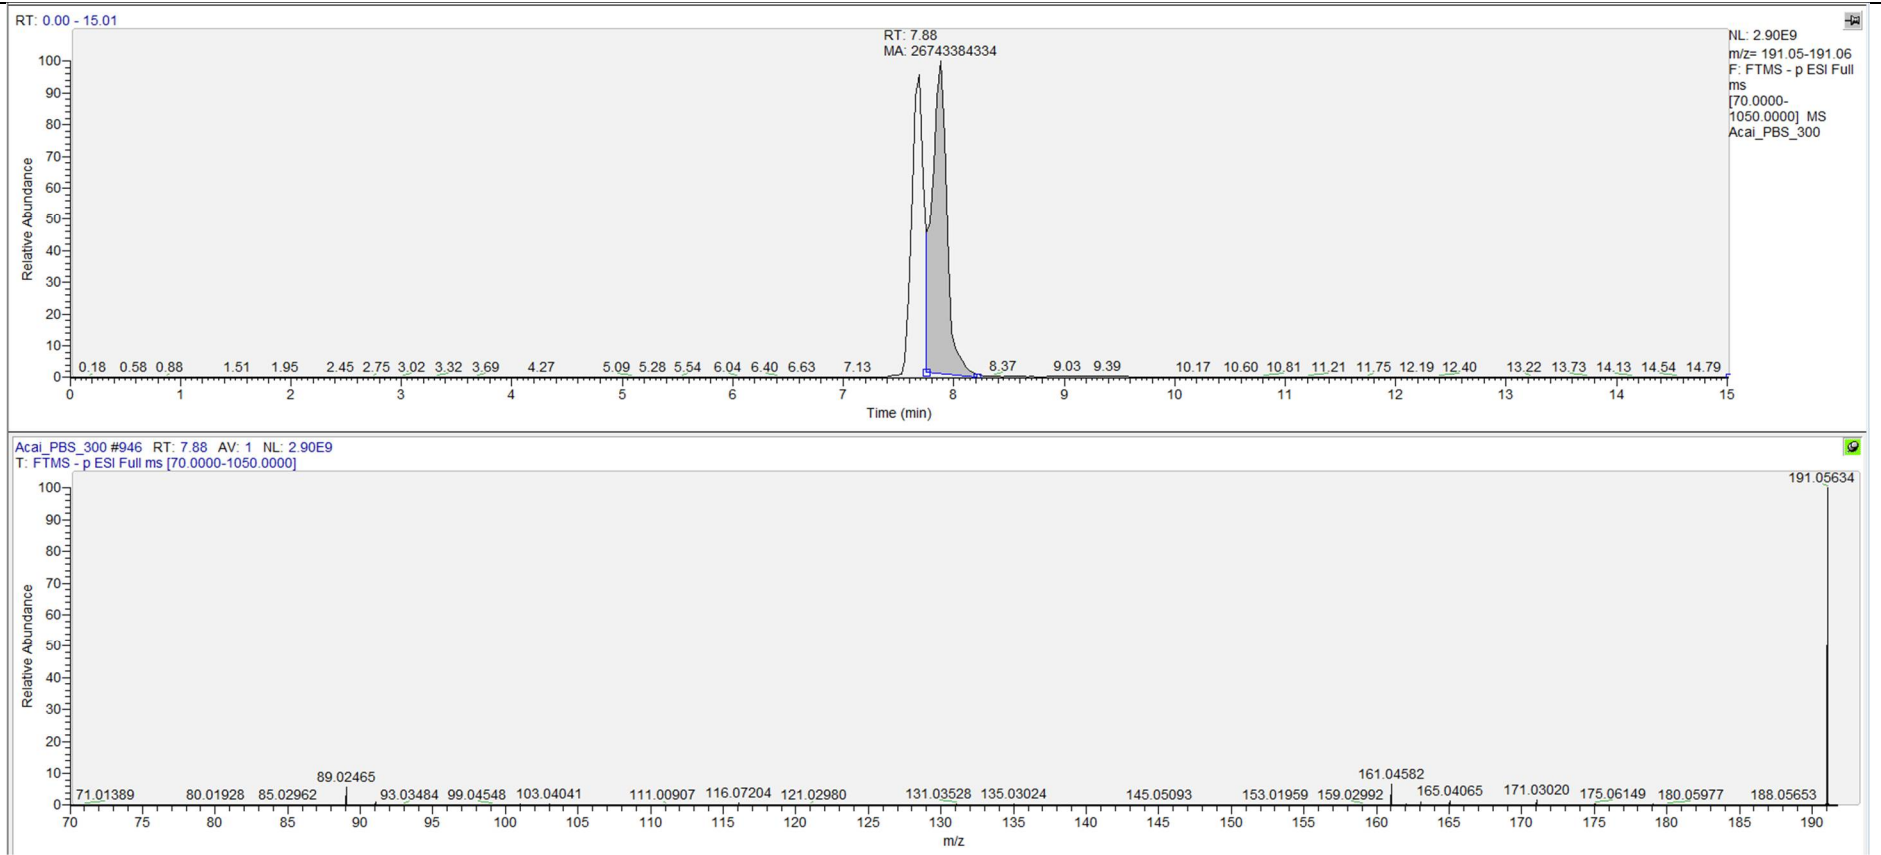

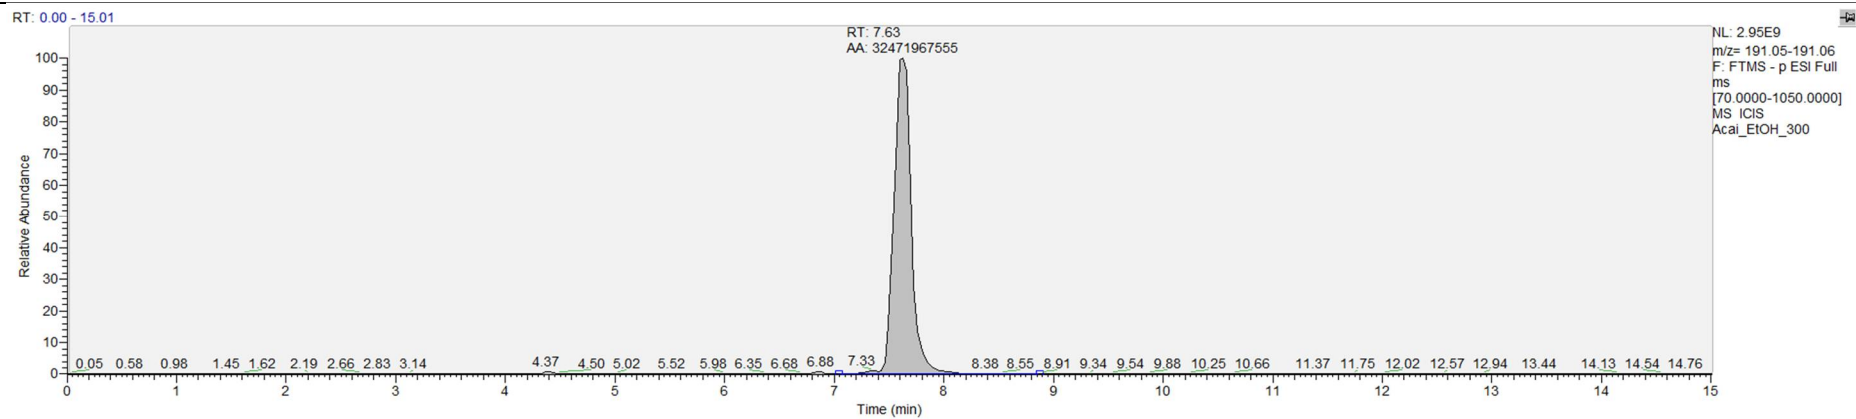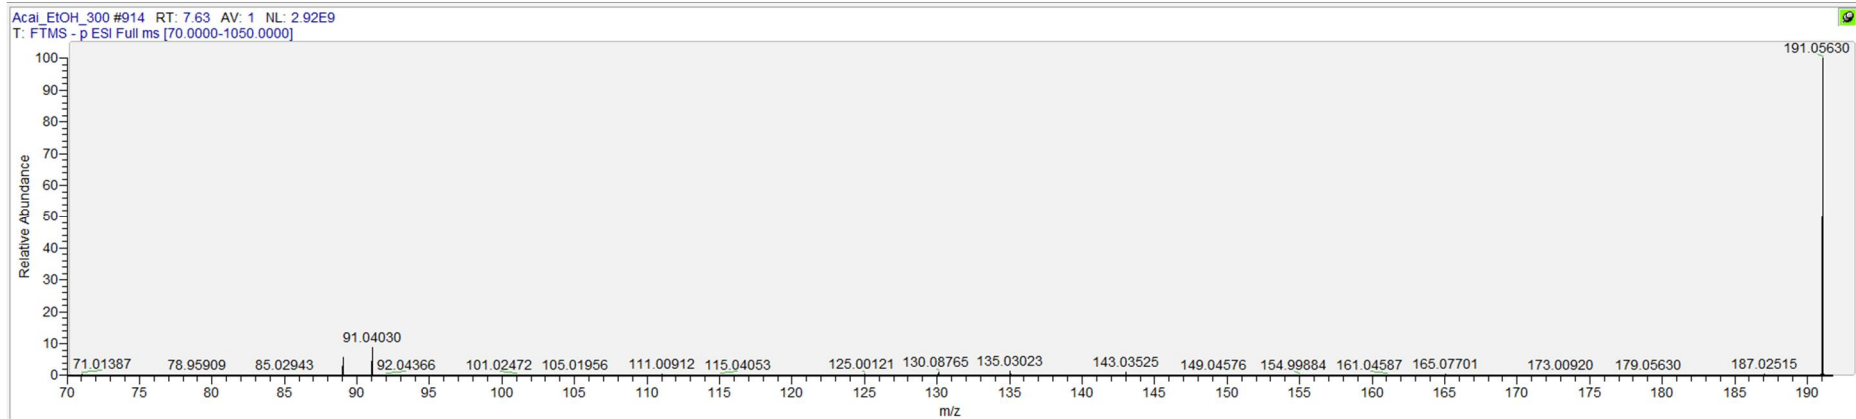

Ascorbic acid  
(Vitamin C)

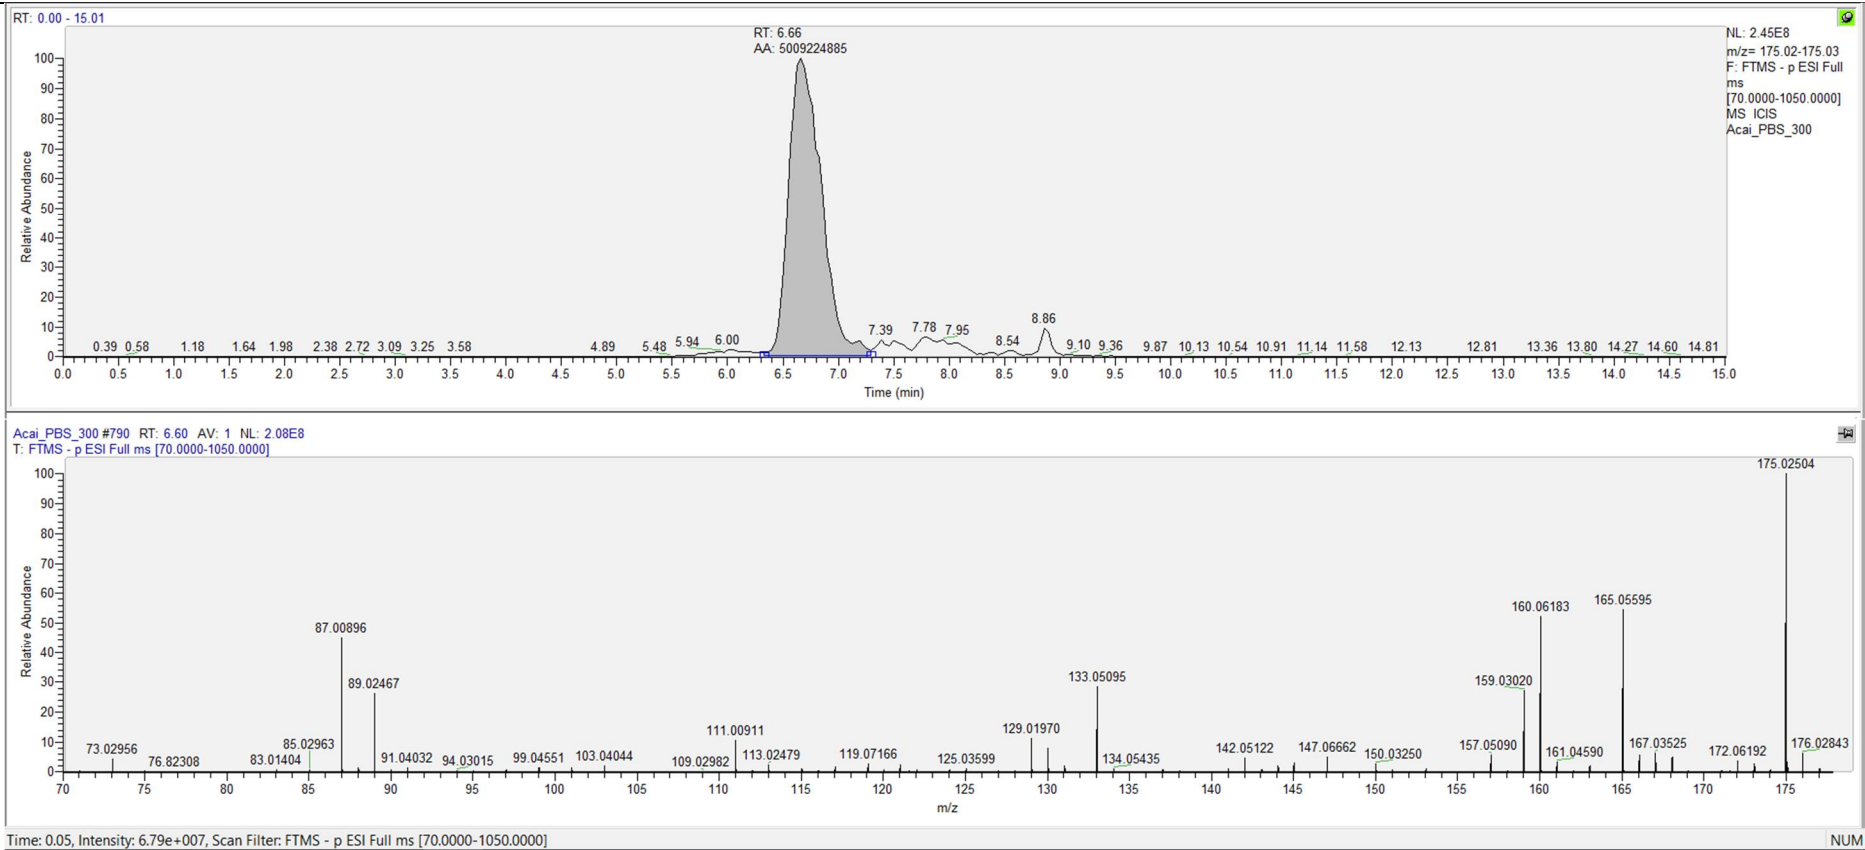

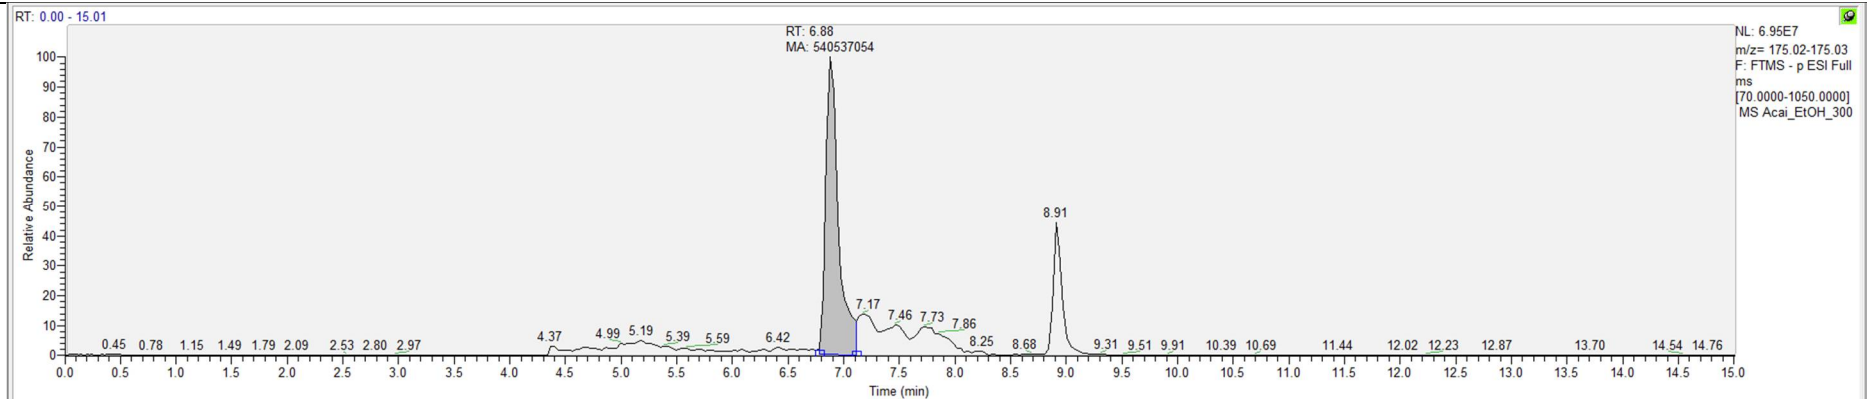

Acai\_EtOH\_300 #822 RT: 6.88 AV: 1 NL: 1.14E8  
T: FTMS - p ESI Full ms [70.0000-1050.0000]

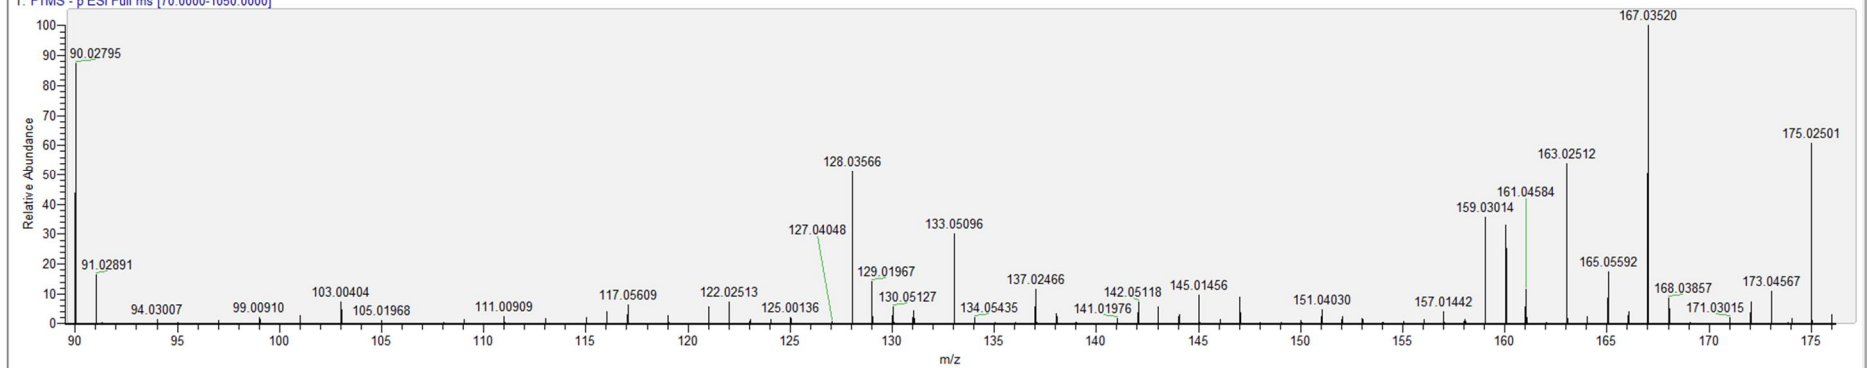

Supplement: s1 [file s1]
