# Supplementary material for: Acai Berry (Euterpe sp.) Extracts Are Neuroprotective against L-Glutamate-Induced Toxicity by Limiting Mitochondrial Dysfunction and Cellular Redox Stress
Source: Life (Basel). 2023 Apr 15;13(4):1019. doi: 10.3390/life13041019 (PMC10144606; doi:10.3390/life13041019)
Supplement: Supplementary file 1 [file life-13-01019-s001.zip › Supplementary Table S1.xlsx]

## Sheet: Table S1 Identification
	Supplementary Table S1: Identificaition of major phytochemicals from acai berry aqueous and ethanolic extracts.
	Acai berry aqueous and ethanolic extractions were resolved by high performance liquid chromatography coupled to mass spectrometer (LC-MS). Compounds were identified by comparing the retention time, parent ion, and mass fragments with authentic standards and MS2 fragmentation patterns.
	Name	Synonym	Formula	Molecular Weight	Retention Time (RT) [min]	Method of identification	Area (Max.)	# mzCloud Results	Acai berry 100 mg/ml Ethanol	Acai berry 300 mg/ml Ethanol	Acai berry 100 mg/ml PBS	Acai berry 300 mg/ml PBS	Ratio: (F12) / (F5)	Ratio: (F14) / (F7)	Log2 Fold Change: (F12) / (F5)	Log2 Fold Change: (F14) / (F7)
	Protocatechuic acid		C7 H6 O4	154.027	6.93	m/z	5.17499e+08	0	2.46396e+08	5.17499e+08	1.42062e+08	2.85976e+08	0.577	0.553	-0.79	-0.86
	Syringic acid		C9 H10 O5	198.053	4.563	m/z, MS/MS	7.49818e+08	5	2.08146e+08	3.60515e+08	7.49818e+08	6.32926e+07	3.602	0.176	1.85	-2.51
	Vanillic acid		C8 H8 O4	168.043	6.632	m/z, MS/MS	4.65241e+09	35	1.3426e+09	4.65241e+09	1.58073e+08	1.23389e+08	0.118	0.027	-3.09	-5.24
	Gallic acid		C7 H6 O5	170.022	6.92	m/z, MS/MS	8.9542e+09	2	5.56386e+08	7.12523e+08	1.1879e+09	1.47073e+09	2.135	2.064	1.09	1.05
	4-Hydroxybenzoic acid		C7 H6 O3	138.032	7.58	m/z, MS/MS	1.61593e+09	6	9.21301e+06	1.33828e+09	8.56287e+06	1.61593e+09	0.929	1.207	-0.11	0.27
	Benzoic acid		C7 H6 O2	122.037	5.005	m/z, MS/MS	5.18539e+09	6	7.62158e+07	2.22144e+08	8.0624e+08	5.18539e+09	10.578	23.342	3.4	4.54
	2,5-Dihydroxybenzoic acid		C7 H6 O4	154.027	8.982	m/z, MS/MS	1.18327e+10	25	6.60746e+09	1.18327e+10	2.37854e+09	1.44158e+09	0.36	0.122	-1.47	-3.04
	Chlorogenic acid	3-Caffeoylquinic acid	C16 H18 O9	354.095	7.054	m/z, MS/MS	1.98786e+10	2	1.97191e+07	5.52088e+07	4.12547e+07	1.75006e+07	2.092	0.317	1.06	-1.66
	Dihydrokaempferol		C15 H12 O6	288.063	6.893	m/z	4.29663e+09	0	2.80593e+09	4.29663e+09	3.56393e+09	8.61071e+06	1.27	0.002	0.34	-8.96
	Luteolin		C15 H10 O6	286.048	6.836	m/z, MS/MS	8.63099e+08	1	6.37975e+08	8.63099e+08	7.43011e+07	3.45944e+06	0.116	0.004	-3.1	-7.96
	Quercetin		C15 H10 O7	302.043	6.969	m/z, MS/MS	3.22859e+09	3	1.93188e+09	3.22859e+09	8.80146e+06	9.52598e+06	0.005	0.003	-7.78	-8.4
	Taxifolin deoxyhexose or Taxifolin		C15 H12 O7	304.058	8.237	m/z	3.62862e+08	0	2.0806e+08	3.62862e+08	5.19009e+07	5.6611e+07	0.249	0.156	-2	-2.68
	Quercetin-3-O-rutinoside	Rutin	C27 H30 O16	610.152	7.395	m/z, MS/MS	2.09134e+08	1	1.0843e+08	1.20401e+08	6.21684e+06	7.09162e+06	0.057	0.059	-4.12	-4.09
	Quercetin 3-O-glucoside	Isoquercitrin; Quercetin-3β-D-glucoside	C21 H20 O12	464.095	7.433	m/z, MS/MS	1.14681e+10	1	6.89787e+07	1.07778e+08	1.45809e+07	1.63761e+07	0.211	0.152	-2.24	-2.72
	Kaempferol rhamnoside		C21 H20 O10	432.105	6.892	m/z	5.27546e+08	0	8.7161e+07	1.6595e+08	9.42446e+07	1.14745e+08	1.081	0.691	0.11	-0.53
	Isoorientin		C21 H20 O11	448.1	7.908	m/z	8.84507e+08	0	5.86613e+08	8.84507e+08	1.80885e+08	1.84793e+08	0.308	0.209	-1.7	-2.26
	(+)-lariciresinol		C20 H24 O6	360.158	4.388	m/z	1.05773e+10	0	1.77613e+09	3.99753e+09	3.04005e+09	1.05773e+10	1.712	2.646	0.78	1.4
	Dihydroconiferyl alcohol		C10 H14 O3	182.095	4.473	m/z	1.64465e+09	0	2.67567e+08	3.0932e+08	4.74006e+08	1.64465e+09	1.772	5.317	0.83	2.41
	(+)-Catechin		C15 H14 O6	290.079	9.394	m/z	1.19515e+07	0	6.24407e+06	1.19515e+07	442005	618038	0.071	0.052	-3.82	-4.27
	(+)-menthiafolic acid		C10 H16 O3	184.11	6.824	m/z	1.6657e+08	0	2.65819e+07	1.6657e+08	5.05664e+07	2.06988e+07	1.902	0.124	0.93	-3.01
	(E,Z)-2,6-dimethyl-2,6-octadiene-1,8-diol		C10 H18 O2	170.131	4.226	m/z	1.32107e+08	0	2.98113e+07	8.59133e+07	6.29698e+07	1.32107e+08	2.112	1.538	1.08	0.62
	(-)-loliolide		C11 H16 O3	196.11	4.218	m/z	7.68234e+09	0	6.89111e+08	1.19688e+09	2.51553e+08	4.05351e+08	0.365	0.339	-1.45	-1.56
	Oleic acid		C18 H34 O2	282.256	3.43	m/z	2.32756e+11	0	1.74306e+11	2.32756e+11	9.6144e+06	3.8631e+07	0	0	-14.15	-12.56
	Palmitoleic acid		C16 H30 O2	254.225	3.516	m/z, MS/MS	5.90466e+09	5	1.5354e+09	1.75553e+09	2.04726e+06	1.77157e+06	0.001	0.001	-9.55	-9.95
	Linoleic acid		C18 H32 O2	280.24	3.434	m/z, MS/MS	6.36574e+10	1	3.70183e+10	6.36574e+10	4.18188e+07	9.52584e+07	0.001	0.001	-9.79	-9.38
	Linolenic acid		C18 H30 O2	278.225	3.459	m/z	1.23431e+11	0	9.15706e+09	9.64031e+09	1.2785e+07	6.29437e+07	0.001	0.007	-9.48	-7.26
	Palmitic acid		C16 H32 O2	256.24	3.488	m/z, MS/MS	6.99148e+10	2	6.99148e+10	6.97813e+10	3.41768e+08	2.17752e+08	0.005	0.003	-7.68	-8.32
	Stearic acid		C18 H36 O2	284.271	3.397	m/z	6.14774e+09	3	5.23051e+09	3.74577e+09	2.38366e+08	4.15745e+07	0.046	0.011	-4.46	-6.49
	Alanine		C3 H7 N O2	89.0477	8.719	m/z, MS/MS, RT	3.31573e+09	2	9.42337e+08	1.58511e+09	1.20425e+09	1.71019e+09	1.278	1.079	0.35	0.11
	Lysine		C6 H14 N2 O2	146.106	12.12	m/z, MS/MS	5.42193e+09	6	8.17731e+06	6.91787e+06	8.62219e+08	1.42717e+09	105.44	206.302	6.72	7.69
	Arginine		C6 H14 N4 O2	174.112	7.939	m/z, MS/MS	8.77114e+09	2	1.1923e+09	4.68976e+09	1.15874e+07	1.62447e+07	0.01	0.003	-6.69	-8.17
	Methionine		C5 H11 N O2 S	149.051	7.731	m/z, MS/MS, RT	1.16218e+09	6	3.05238e+06	6.07314e+06	3.42882e+07	4.49477e+07	11.233	7.401	3.49	2.89
	Phenylalanine		C9 H11 N O2	165.079	7.118	m/z, MS/MS	2.16316e+10	4	9.03228e+08	1.70381e+09	4.34806e+09	4.4072e+09	4.814	2.587	2.27	1.37
	Proline		C5 H9 N O2	115.063	8.129	m/z, MS/MS, RT	3.15385e+10	2	8.0027e+09	9.45077e+09	1.49519e+10	1.37771e+10	1.868	1.458	0.9	0.54
	Glutamic acid		C5 H9 N O4	147.053	8.094	m/z, MS/MS, RT	4.23956e+09	3	4.62904e+08	7.59394e+08	2.65664e+09	3.52079e+08	5.739	0.464	2.52	-1.11
	Serine		C3 H7 N O3	105.043	8.998	m/z, MS/MS, RT	1.44817e+09	3	1.15778e+08	2.54196e+08	3.17495e+08	7.97823e+08	2.742	3.139	1.46	1.65
	Glycine		C2 H5 N O2	75.032	8.995	m/z, MS/MS, RT	1.66006e+08	0	2.4147e+06	5.10606e+06	3.64555e+07	6.77008e+07	15.097	13.259	3.92	3.73
	Threonine		C4 H9 N O3	119.058	8.576	m/z, MS/MS, RT	2.19581e+09	12	4.35342e+08	8.00456e+08	1.52043e+09	1.49546e+09	3.492	1.868	1.8	0.9
	Histidine		C6 H9 N3 O2	155.069	8.605	m/z, MS/MS, RT	1.30216e+09	2	2.53702e+06	2.56648e+06	4.31822e+08	7.03732e+08	170.208	274.201	7.41	8.1
	Tryptophan		C11 H12 N2 O2	204.09	8.115	m/z, MS/MS, RT	2.44533e+09	9	1.46363e+08	2.41581e+08	1.94891e+08	2.60634e+08	1.332	1.079	0.41	0.11
	Tyrosine		C9 H11 N O3	181.074	8.399	m/z, MS/MS, RT	2.58613e+09	12	2.53308e+08	3.86242e+08	6.71882e+08	7.06592e+08	2.652	1.829	1.41	0.87
	Isoleucine		C6 H13 N O2	131.095	7.634	m/z, MS/MS, RT	10689110289	4	2.1318e+09	3.06284e+09	3.02932e+09	1.06891e+10	1.421	3.49	0.51	1.8
	Valine		C5 H11 N O2	117.079	7.566	m/z, MS/MS, RT	2.00992e+10	4	1.68449e+10	2.00992e+10	1.39805e+10	1.70157e+10	0.83	0.847	-0.27	-0.24
	Leucine		C6 H13 N O2	131.095	7.462	m/z, MS/MS, RT	4.46393e+10	4	3.54735e+09	5.00282e+09	6.96141e+09	1.39863e+10	1.962	2.796	0.97	1.48
	Cellotetraose	beta-D-Glucopyranosyl-(1->4)-beta-D-glucopyranosyl-(1->4)-beta-D-glucopyranosyl-(1->4)-beta-D-glucopyranose	C24 H42 O21	666.223	8.82	m/z, MS/MS *	1.46342e+07	0	3.73752e+06	6.9212e+06	1.46992e+06	3.11731e+06	0.393	0.45	-1.35	-1.15
	Sucrose		C12 H22 O11	342.116	8.652	m/z, MS/MS, RT	2.97671e+10	4	4.23948e+08	7.44189e+08	2.06117e+08	2.57794e+08	0.486	0.346	-1.04	-1.53
	Quinic acid		C7 H12 O6	192.064	7.658	m/z, MS/MS	3.99075e+10	1	2.3463e+10	3.99075e+10	3.92344e+10	2.45294e+10	1.672	0.615	0.74	-0.7
	Ascorbic acid	Vitamin C	C6 H8 O6	176.032	6.765	m/z, MS/MS	5.47991e+09	2	6.70492e+08	5.83323e+08	1.12266e+09	5.47991e+09	1.674	9.394	0.74	3.23
						*MS/MS match is to mass spectrum reported in Yong-Bing Xu, Gui-Lin Chen and Ming-Quan Guo, Antioxidants, 2019, 8, 296; doi:10.3390/antiox8080296
